# Supplementary material for: A high level of liver-specific expression of oncogenic KrasV12 drives robust liver tumorigenesis in transgenic zebrafish
Source: PubMed Central journal article supplement — Dis Model Mech. 2011 Jul 4;4(6):801–13. doi: 10.1242/dmm.007831 (PMC3209649; doi:10.1242/dmm.007831), 2011-07-04
Supplement: supp_007831_DMM007831FigS1.pdf [file supp_007831_DMM007831FigS1.pdf]

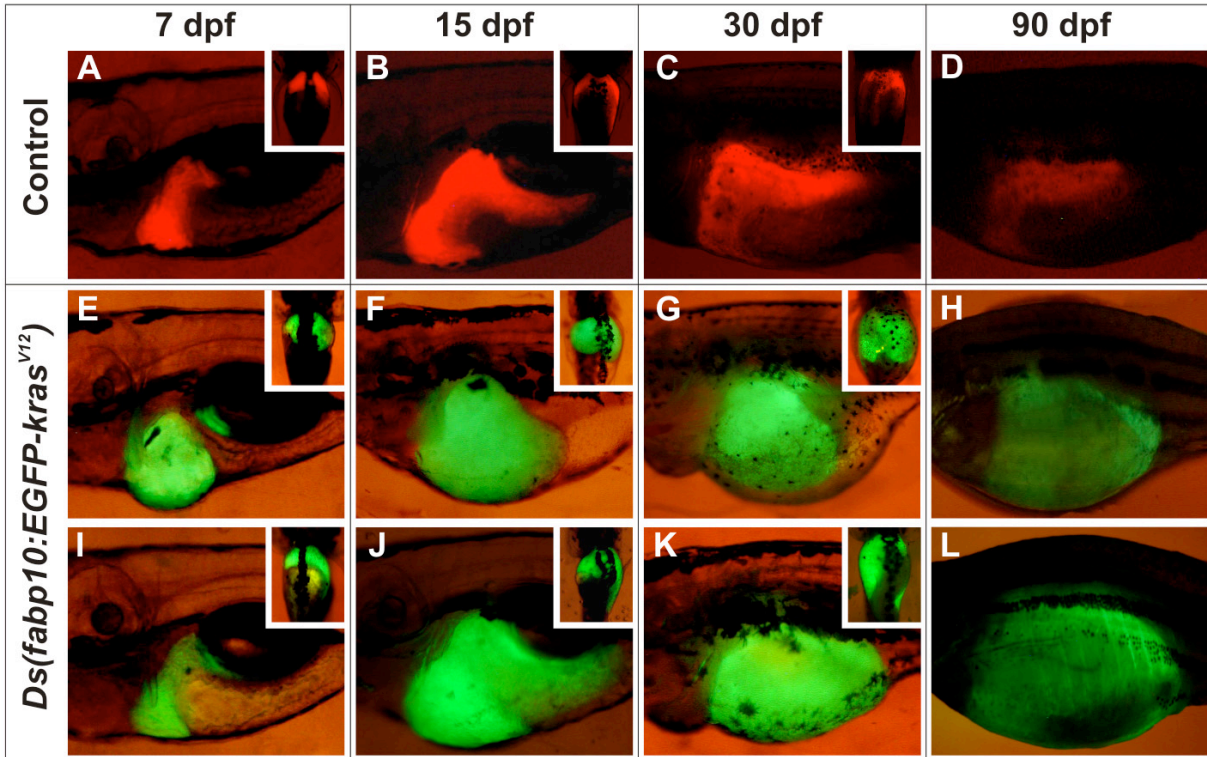

**Fig. S1. Morphological development of liver in transgenic fish expressing *EGFP-kras<sup>V12</sup>*.** Comparison of liver morphogenesis between LiPan control [*Tg(fabp10:dsRFP; elaA:EGFP)*] zebrafish (A-D) and two representative cases of abnormal liver morphology distinguished by different degrees of liver enlargement/hyperplasia at the early stages (E-H and I-L) observed in the F<sub>1</sub>/I *Tg(fabp10:EGFP-kras<sup>V12</sup>)* zebrafish. Note that there were no obvious differences between these two cases at the later stages. (A,E,I) 7 dpf (day post-fertilization); (B,F,J) 15 dpf; (C,G,K) 30 dpf; (D,H,L) 90 dpf. All big images are lateral view whereas all insets are ventral view.
