# Supplementary material for: A high level of liver-specific expression of oncogenic KrasV12 drives robust liver tumorigenesis in transgenic zebrafish
Source: PubMed Central journal article supplement — Dis Model Mech. 2011 Jul 4;4(6):801–13. doi: 10.1242/dmm.007831 (PMC3209649; doi:10.1242/dmm.007831), 2011-07-04
Supplement: supp_007831_DMM007831FigS2.pdf [file supp_007831_DMM007831FigS2.pdf]

## $F_1/I$ *kras*<sup>V12</sup> transgenic zebrafish

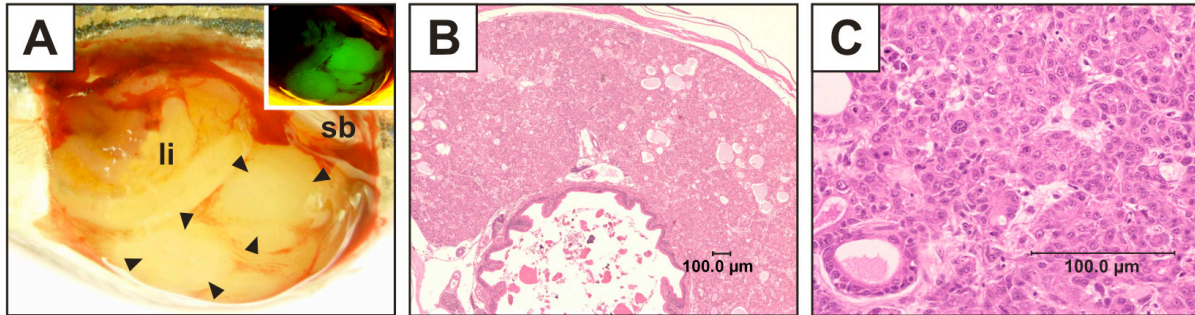

**Fig. S2. Morphological and histological examination of liver tumor of  $F_1/I$  transgenic fish.** (A) Liver from transgenic male fish of line  $F_1/I$  (84 dpf) displaying macroscopic tanned nodules. (B,C) Histological observations confirmed mixed carcinoma with hepatocellular component grade III.
