# Supplementary material for: A high level of liver-specific expression of oncogenic KrasV12 drives robust liver tumorigenesis in transgenic zebrafish
Source: PubMed Central journal article supplement — Dis Model Mech. 2011 Jul 4;4(6):801–13. doi: 10.1242/dmm.007831 (PMC3209649; doi:10.1242/dmm.007831), 2011-07-04
Supplement: supp_007831_DMM007831TableS1.pdf [file supp_007831_DMM007831TableS1.pdf]

**Table S1. Differentially expressed genes having human homologues in *kras*<sup>V12</sup> transgenic zebrafish in liver hyperplasia and carcinoma (log<sub>2</sub> fold-change ≥1.5; FDR-adjusted p-value ≤0.01).** Data represent the mean log<sub>2</sub> fold-change differences of genes differentially expressed in HL (H, 3 months) and HCC (C, 9 months) when compared with age-matched wild-type normal livers. Genes whose average expression level differed by ≥1.5-fold in each age group after Student's t-test (FDR-adjusted p-value ≤0.01) and having human homologues were filtered. The GenBank accession number, gene name and gene symbols (zebrafish and human) of each gene are shown. The mean fold-changes indicating up- or down-regulation in gene expression at hyperplasia and carcinoma are also indicated.

| GenBank  | Gene name                                                                                                                                                                                                                                                            | Gene symbol        |           | Fold-change |       |
|----------|----------------------------------------------------------------------------------------------------------------------------------------------------------------------------------------------------------------------------------------------------------------------|--------------------|-----------|-------------|-------|
|          |                                                                                                                                                                                                                                                                      | Zebrafish          | Human     | H           | C     |
| BI326782 | Sim to alpha-2-macroglobulin                                                                                                                                                                                                                                         | LOC100006925       | A2M       | 4.23        | 2.84  |
| AI957415 | Weak sim to alpha-2-macroglobulin-like 1                                                                                                                                                                                                                             | sb.cb37            | A2ML1     | 2.72        | 2.45  |
| BM103155 | Acetoacetyl-CoA synthetase                                                                                                                                                                                                                                           | aacs               | AACS      | 3.86        | 6.39  |
| BC097202 | LOC619247 sim to aminoadipate-semialdehyde dehydrogenase-phosphopantetheinyl transferase                                                                                                                                                                             | zgc:114148         | AASDHPPPT | 0.90        | 1.94  |
| AW076835 | ATP-binding cassette, sub-family A (ABC1), member 12                                                                                                                                                                                                                 | abca12             | ABCA12    | -2.35       | -1.92 |
| BI891029 | Sim to ABCA3   ATP-binding cassette, sub-family A (ABC1), member 3                                                                                                                                                                                                   | BI891029           | ABCA3     | -1.77       | -0.73 |
| AW344325 | Sim to ATP-binding cassette, sub-family B (MDR/TAP), member 1<br>3' end of LOC571189: sim to sister of P-glycoprotein (ATP-binding cassette, sub-family B (MDR/TAP), member 11) and 3' to LOC571214: sim to Microtubule-associated serine/threonine-protein kinase 3 | im:7158730         | ABCB1     | -2.56       | -2.24 |
| AW019239 | AW019239                                                                                                                                                                                                                                                             | AW019239           | ABCB11    | 3.96        | 3.46  |
| AW279805 | ATP-binding cassette, sub-family C (CFTR/MRP), member 2                                                                                                                                                                                                              | abcc2              | ABCC2     | 1.41        | 3.15  |
| BI672727 | ATP-binding cassette, sub-family C (CFTR/MRP), member 4                                                                                                                                                                                                              | abcc4              | ABCC4     | -3.49       | -0.50 |
| AW019127 | ATP-binding cassette, sub-family D (ALD), member 3a                                                                                                                                                                                                                  | abcd3a             | ABCD3     | 4.18        | 3.40  |
| BC047181 | ATP-binding cassette, sub-family F (GCN20), member 2                                                                                                                                                                                                                 | abcf2              | ABCF2     | 2.74        | -2.39 |
| BI671305 | Abi1-interactor 1                                                                                                                                                                                                                                                    | abi1a              | ABI1      | -1.24       | 2.44  |
| BM072329 | Amiloride binding protein 1 (amine oxidase (copper-containing))                                                                                                                                                                                                      | abp1               | ABP1      | -2.00       | -4.13 |
| BC080266 | LOC445477 sim to actin-binding Rho activating protein                                                                                                                                                                                                                | zgc:92005          | ABRA      | -1.69       | -0.86 |
| AW466674 | LOC553674 sim to acyl-Coenzyme A binding domain containing 5                                                                                                                                                                                                         | zgc:112043         | ACBD5     | 2.07        | 0.76  |
| BM154186 | 3' end of aclyb   ATP citrate lyase b and 5' to klh11   kelch-like 11<br>3' end of acct11: acyl-CoA thioesterase 11 and 3' to CH211-215B16.4 sim to FAM151A   family with sequence similarity 151, member A                                                          | BM154186           | ACLY      | 1.71        | -1.27 |
| AI584333 | Acid phosphatase 5, tartrate resistant                                                                                                                                                                                                                               | wu:fb92e04         | ACOT11    | 1.50        | 1.53  |
| AI882824 | Acyl-CoA synthetase long-chain family member 1                                                                                                                                                                                                                       | acp5               | ACPS      | -4.20       | -6.73 |
| AI884128 | 3' end of sidkeyp-109h9.2: acyl-CoA synthetase long-chain family member 3 and 5' to sidkeyp-109h9.3: potassium voltage-gated channel, Isk-related family, member 4                                                                                                   | acs11              | ACSL1     | -1.42       | -3.06 |
| AI558294 | Acyl-CoA synthetase long-chain family member 4                                                                                                                                                                                                                       | wu:fb78e09         | ACSL3     | -3.25       | -0.90 |
| AI721419 | LOC447860 sim to acyl-CoA synthetase long-chain family member 5                                                                                                                                                                                                      | acsl4              | ACSL4     | -1.61       | 2.36  |
| BC081587 | Actin, alpha 1, skeletal muscle                                                                                                                                                                                                                                      | zgc:92083          | ACSL5     | 2.03        | -4.91 |
| BC071401 | LOC415164 sim to actin, alpha, cardiac muscle 1                                                                                                                                                                                                                      | acta1              | ACTC1     | -2.03       | 0.73  |
| AI588265 | 3' end of acvr1b   activin A receptor, type 1B and 3' to dh1 desert hedgehog                                                                                                                                                                                         | zgc:86725          | ACTC1     | -4.35       | -1.86 |
| BC045399 | Aminoacylase 1                                                                                                                                                                                                                                                       | wu:fb98e08         | ACVR1B    | 3.45        | -1.88 |
| BC076532 | Adenosine deaminase                                                                                                                                                                                                                                                  | zgc:55605          | ACY1      | -1.24       | -1.54 |
| BM083001 | Adenosine deaminase-like                                                                                                                                                                                                                                             | ada                | ADA       | -0.20       | -2.36 |
| BI851021 | A disintegrin and metalloprotease domain 10b                                                                                                                                                                                                                         | adal               | ADAL      | -1.79       | -0.80 |
| BC057428 | A disintegrin and metalloprotease domain 8a                                                                                                                                                                                                                          | adam10b            | ADAM10    | 1.43        | 1.62  |
| AF329730 | Adenylylase activating polypeptide 1b                                                                                                                                                                                                                                | adam8a             | ADAM8     | 0.28        | -2.04 |
| AF399909 | Alcohol dehydrogenase 5                                                                                                                                                                                                                                              | adcyap1b           | ADCYAP1   | -2.88       | -1.11 |
| BC055142 | LOC395427 sim to ADH5: alcohol dehydrogenase 5 (class III), chi polypeptide                                                                                                                                                                                          | adh5               | ADH5      | -2.15       | 1.77  |
| AI331606 | 3' end of adipolq12   adiponectin, C1Q and collagen domain containing, like 2                                                                                                                                                                                        | zgc:63568          | ADH5      | -0.47       | -2.33 |
| AI657574 | Adenosine kinase a                                                                                                                                                                                                                                                   | LOC794315          | ADIPOQ    | 1.04        | -2.07 |
| AW421018 | 3' end of adm2 adrenomedullin 2                                                                                                                                                                                                                                      | adka               | ADK       | 0.34        | 3.64  |
| BC078399 | LOC445059 sim to ADP-ribosylarginine hydrolase                                                                                                                                                                                                                       | AW421018           | ADM2      | 0.55        | 1.89  |
| AY048971 | Adrenergic, alpha-2A-, receptor                                                                                                                                                                                                                                      | zgc:91926          | ADPRH     | 3.46        | 2.16  |
| BC092877 | LOC550502 sim to adenylosuccinate synthase                                                                                                                                                                                                                           | adra2a             | ADRA2A    | 1.61        | 2.09  |
| BC070009 | Adenylosuccinate synthase like 1                                                                                                                                                                                                                                     | zgc:110327         | ADSS      | -1.60       | -2.25 |
| BM081849 | Sim to AE binding protein 1                                                                                                                                                                                                                                          | adssl1             | ADSSL1    | 1.86        | 0.69  |
| AW422593 | AE binding protein 2                                                                                                                                                                                                                                                 | si:ch1073-459j12.1 | AEBP1     | -2.41       | -1.09 |
| AF085218 | Chico (sim to amino-terminal enhancer of split)                                                                                                                                                                                                                      | aebp2              | AEBP2     | 1.87        | 1.16  |
| AW281869 | Amylo-1, 6-glucosidase, 4-alpha-glucanotransferase                                                                                                                                                                                                                   | chico              | AES       | 2.72        | 0.51  |
| AW019740 | 1-acylglycerol-3-phosphate O-acyltransferase 2 (lysophosphatidic acid acyltransferase, beta)                                                                                                                                                                         | agl                | AGL       | -1.52       | -1.60 |
| BI884206 | 3' end of agpat3   1-acylglycerol-3-phosphate O-acyltransferase 3 and 5' to LOC564635                                                                                                                                                                                | agpat2             | AGPAT1    | -1.07       | -1.83 |
| AW019737 | 1-acylglycerol-3-phosphate O-acyltransferase 9                                                                                                                                                                                                                       | BI884206           | AGPAT3    | -1.01       | 3.99  |
| AW233227 | Anterior gradient homolog 2                                                                                                                                                                                                                                          | agpat9             | AGPAT9    | -1.77       | 0.53  |
| BG727310 | Angiotensinogen                                                                                                                                                                                                                                                      | agr2               | AGR2      | -4.47       | -3.29 |
| AW019124 | Alanine-glyoxylate aminotransferase                                                                                                                                                                                                                                  | agt                | AGT       | 0.95        | 6.48  |
| BF717714 | Alanine-glyoxylate aminotransferase, like                                                                                                                                                                                                                            | agxt               | AGXT      | 0.49        | 6.18  |
| BI671185 | S-adenosylhomocysteine hydrolase-like 1                                                                                                                                                                                                                              | agxtl              | AGXT      | 2.13        | 5.42  |
| CD283124 | Adenosylhomocysteinease                                                                                                                                                                                                                                              | ahcy11             | AHCYL1    | -2.41       | 3.58  |
| Y08433   | Aryl hydrocarbon receptor 1a                                                                                                                                                                                                                                         | zgc:158222         | AHCYL2    | 2.87        | -1.81 |
| AF063446 | Aryl hydrocarbon receptor 2                                                                                                                                                                                                                                          | ahr1a              | AHR       | 0.91        | 2.47  |
| AI496863 | Alpha-2-HS-glycoprotein                                                                                                                                                                                                                                              | ahr2               | AHR       | 0.06        | 2.62  |
| BG305622 | Programmed cell death 8 (apoptosis-inducing factor, mitochondrion-associated, 1)                                                                                                                                                                                     | ahsg               | AHSG      | 4.03        | 5.06  |
|          |                                                                                                                                                                                                                                                                      | pdcd8              | AIFM1     | -0.42       | -1.77 |

|           |                                                                                                                                                         |                   |          |       |       |
|-----------|---------------------------------------------------------------------------------------------------------------------------------------------------------|-------------------|----------|-------|-------|
| BC075979  | LOC436885 weak sim to AIFM3: apoptosis-inducing factor, mitochondrion-associated, 3                                                                     | zgc:92275         | AIFM3    | 2.37  | 2.24  |
| AF274877  | Aryl hydrocarbon receptor interacting protein                                                                                                           | aip               | AIP      | -1.75 | 1.82  |
| AW116492  | Sim to A kinase (PKA) anchor protein 13                                                                                                                 | LOC798734         | AKAP13   | 4.20  | 1.31  |
| BI982810  | Weak sim to A kinase (PKA) anchor protein 2                                                                                                             | uo:ion006         | AKAP2    | 2.14  | 2.80  |
| BG302955  | V-akt murine thymoma viral oncogene homolog 2, like                                                                                                     | akt2l             | AKT2     | 1.06  | 2.91  |
| AF095747  | Aminolevulinic acid, delta-, synthetase 2                                                                                                               | alas2             | ALAS2    | -2.70 | -0.08 |
| L25273    | Activated leukocyte cell adhesion molecule 4                                                                                                            | alcama            | ALCAM    | -1.76 | 1.51  |
| AF339837  | Aldehyde dehydrogenase 1 family, member A2                                                                                                              | aldh1a2           | ALDH1A2  | -1.65 | -2.25 |
| AW344274  | Sim to aldehyde dehydrogenase 2 family (mitochondrial)                                                                                                  | wu:fb14d09        | ALDH2    | 0.28  | -2.42 |
| AF254955  | Aldehyde dehydrogenase 3 family, member D1                                                                                                              | aldh3d1           | ALDH3B1  | 0.16  | -3.22 |
| BI879264  | Aldehyde dehydrogenase 7 family, member A1                                                                                                              | aldh7a1           | ALDH7A1  | -2.39 | -2.14 |
| AF544950  | Aldehyde dehydrogenase 9 family, member A1b                                                                                                             | aldh9a1b          | ALDH9A1  | 0.84  | -4.07 |
| AW116838  | Aldolase a, fructose-bisphosphate, a                                                                                                                    | aldoaa            | ALDOA    | -4.07 | -0.86 |
| BM071225  | Aldolase a, fructose-bisphosphate, b                                                                                                                    | aldoab            | ALDOA    | -3.61 | -0.38 |
| BG304331  | Asparagine-linked glycosylation 9 homolog (S. cerevisiae, alpha- 1,2-mannosyltransferase)                                                               | alg9              | ALG9     | 2.35  | 0.92  |
| AW232270  | Intergenic 3' to alk   anaplastic lymphoma kinase (Ki-1) and 3' to LOC100148741                                                                         | AW232270          | ALK      | 1.81  | -1.18 |
| BK865157  | Intestinal alkaline phosphatase                                                                                                                         | zgc:110409        | ALPI     | -1.32 | -1.95 |
| QQ481034  | Sim to alkaline phosphatase, liver/bone/kidney                                                                                                          | LOC564254         | ALPL     | 1.64  | 1.35  |
| BG303733  | Amotrophic lateral sclerosis 2 (juvenile) chromosome region, candidate 8                                                                                | als2cr8           | ALS2CR8  | -1.71 | 0.19  |
| AJ477606  | Alpha-1-microglobulin/bikunin precursor, like                                                                                                           | ambp1             | AMB      | 3.23  | 2.40  |
| BM005224  | Adenosylmethionine decarboxylase 1                                                                                                                      | amd1              | AMD1     | -2.23 | 2.40  |
| BC063996  | Adenosine monophosphate deaminase 1 (isoform M)                                                                                                         | ampd1             | AMPD1    | 2.30  | 1.33  |
| BM103972  | Amylase, alpha 2A; pancreatic                                                                                                                           | amy2a             | AMY2A    | 1.61  | -5.75 |
| BC075900  | LOC445049 sim to amylase, alpha 2A (pancreatic)                                                                                                         | zgc:92137         | AMY2A    | 2.73  | 2.95  |
| AW280158  | Sim to anaphase promoting complex subunit 1                                                                                                             | AW280158          | ANAPC1   | -1.83 | -1.20 |
| BI878018  | LOC558814 sim to anaphase promoting complex subunit 10                                                                                                  | zgc:153242        | ANAPC10  | -4.67 | -4.59 |
| BM183990  | Anaphase promoting complex subunit 5                                                                                                                    | anapc5            | ANAPC5   | -0.87 | -2.14 |
| AF379602  | Angiopoietin 1                                                                                                                                          | angpt1            | ANGPT1   | 0.12  | 2.54  |
| AB199647  | Angiopoietin-like 1                                                                                                                                     | angptl1           | ANGPTL1  | 0.76  | 1.72  |
| AB199648  | Angiopoietin-like 2                                                                                                                                     | angptl2           | ANGPTL2  | 1.07  | 4.67  |
| BQ169332  | Angiopoietin-like 6                                                                                                                                     | angptl6           | ANGPTL2  | 1.14  | 2.51  |
| BE201957  | Angiopoietin-like 2b                                                                                                                                    | zgc:194138        | ANGPTL2  | 0.16  | 2.89  |
| AF379604  | Angiopoietin-like 3                                                                                                                                     | angptl3           | ANGPTL3  | 1.39  | 4.59  |
| BE202096  | LOC450053 sim to angiopoietin-like 7                                                                                                                    | zgc:101687        | ANGPTL7  | -2.83 | -3.11 |
| BI886030  | Similar to Ankyrin repeat domain-containing protein 11 (Ankyrin repeat-containing cofactor 1)                                                           | LOC793422         | ANKRD11  | -1.60 | 0.86  |
| BI673416  | Acidic (leucine-rich) nuclear phosphoprotein 32 family, member B                                                                                        | anp32b            | ANP32B   | -0.54 | -2.19 |
| AI545611  | Sim to ANPEP   alanyl (membrane) aminopeptidase                                                                                                         | LOC100006595      | ANPEP    | 1.23  | -2.21 |
| AW128428  | Annexin A1a                                                                                                                                             | anxa1a            | ANXA1    | -3.68 | 1.21  |
| AJ3131515 | Annexin A1b                                                                                                                                             | anxa1b            | ANXA1    | -5.29 | -4.21 |
| BI889370  | Annexin A1c                                                                                                                                             | anxa1c            | ANXA1    | -4.12 | -1.96 |
| BI889313  | Annexin A11a                                                                                                                                            | anxa11a           | ANXA11   | 0.27  | 1.95  |
| AI957567  | Annexin A11b                                                                                                                                            | anxa11b           | ANXA11   | 0.67  | 2.21  |
| BI885541  | Annexin A13                                                                                                                                             | anxa13            | ANXA13   | 1.03  | 2.49  |
| BI707699  | LOC554118 sim to annexin A13                                                                                                                            | zgc:112421        | ANXA13   | -2.27 | -1.78 |
| AI883512  | Annexin A2a                                                                                                                                             | anxa2a            | ANXA2    | 0.26  | 2.10  |
| AW077600  | LOC100000433 no homol 3' end of zgc:101785:LOC450032 sim to ANXA2: annexin A2                                                                           | LOC100000433      | ANXA2    | -2.52 | -4.05 |
| BE557263  | Annexin A4                                                                                                                                              | anxa4             | ANXA4    | 3.33  | 3.54  |
| BC046873  | Annexin A5                                                                                                                                              | anxa5             | ANXA5    | 2.53  | -0.70 |
| BI891593  | Annexin A6                                                                                                                                              | anxa6             | ANXA6    | 2.48  | -0.88 |
| BM172690  | Adaptor-related protein complex 2, beta 1 subunit                                                                                                       | ap2b1             | AP2B1    | 2.67  | -0.52 |
| BI473992  | Sim to AP3B1   adaptor-related protein complex 3, beta 1 subunit                                                                                        | LOC569016         | AP3B1    | -0.30 | 2.15  |
| BI866388  | Apoptotic protease activating factor 1                                                                                                                  | apaf1             | APAF1    | 0.96  | -2.16 |
| AI793772  | Apoptosis-inducing, TAF9-like domain 1                                                                                                                  | zgc:194319        | APITD1   | 3.97  | 1.18  |
| AJ245491  | Weak sim to apolipoprotein A-I                                                                                                                          | xx:sd49           | APOA1    | 3.86  | 3.68  |
| Y13653    | Apolipoprotein A-I (weak sim to APOA4)                                                                                                                  | apoa1             | APOA4    | -2.89 | -5.72 |
| AI477980  | Apolipoprotein A-IV                                                                                                                                     | apoa4             | APOA4    | 1.94  | -1.33 |
| AW019803  | Vitellogenin 6                                                                                                                                          | vgl1              | APOB     | -4.32 | -2.74 |
| BM101644  | LOC100148022 sim to apolipoprotein D                                                                                                                    | LOC100148022      | APOD     | -3.81 | -4.95 |
| AJ236882  | Apolipoprotein Eb                                                                                                                                       | apoeb             | APOE     | 4.61  | 2.32  |
| BI867505  | Apolipoprotein M                                                                                                                                        | apom              | APOM     | 4.65  | 4.99  |
| AW422269  | Aquaporin 3                                                                                                                                             | aqp3              | AQP3     | -6.34 | -3.47 |
| BG305916  | 3' end of LOC570191 sim to AQP9   aquaporin 9 and 5' to lipc   lipase, hepatic                                                                          | BG305916          | AQP9     | 3.03  | 3.04  |
| BI473712  | Archain 1 like                                                                                                                                          | arcn11            | ARCN1    | 2.14  | 2.45  |
| BM005100  | ADP-ribosylation factor 1 like                                                                                                                          | arf11             | ARF1     | 0.45  | -2.05 |
| BC075924  | ADP-ribosylation factor 3a                                                                                                                              | arf3a             | ARF3     | -0.70 | -2.70 |
| BM036098  | ADP-ribosylation factor GTPase activating protein 3                                                                                                     | arfgap3           | ARFGAP3  | -3.16 | -0.24 |
| BG985689  | ADP-ribosylation factor interacting protein 1 (arfapin 1)                                                                                               | arfip1            | ARFIP1   | -0.08 | -2.60 |
| AI641593  | 3' end of arfp2b   ADP-ribosylation factor interacting protein 2b and 5' to zgc:153126 sim to FHDC1   FH2 domain containing 1                           | wu:fc17e06        | ARFIP2   | -0.53 | -1.63 |
| AW018735  | Arginase, type II                                                                                                                                       | arg2              | ARG2     | 0.57  | 5.42  |
| BI879861  | Rho GTPase activating protein 12                                                                                                                        | arhgap12          | ARHGAP12 | 1.87  | 3.84  |
| AW826580  | Rho GTPase activating protein 20                                                                                                                        | arhgap20          | ARHGAP20 | 3.43  | -1.16 |
| CV576369  | Intergenic 3' to DKEY-13N15.5 sim to ARHGAP25   Rho GTPase activating protein 25 and 5' to si:dkey-13n15.5 sim to BMP10   bone morphogenetic protein 10 | CV576369          | ARHGAP25 | 4.02  | -0.20 |
| BI671403  | Rho GTPase activating protein 29a; wu:fi83g02                                                                                                           | arhgap29a         | ARHGAP29 | 1.59  | 1.39  |
| BM187499  | LOC557983 sim to Rho guanine nucleotide exchange factor (GEF) 1                                                                                         | zgc:136551        | ARHGEF1  | 0.49  | -1.68 |
| BG883520  | Rho guanine nucleotide exchange factor (GEF) 1                                                                                                          | arhgef1           | ARHGEF2  | 0.62  | 2.02  |
| BE202058  | Sim to Rho guanine nucleotide exchange factor (GEF) 4                                                                                                   | LOC559017         | ARHGEF4  | -2.30 | -1.11 |
| BM571146  | Intron of wu:fd16d01 weak sim to Rho guanine nucleotide exchange factor (GEF) 5                                                                         | BM571146          | ARHGEF5  | 4.55  | 0.34  |
| BG305579  | ADP-ribosylation factor-like 3, like 1                                                                                                                  | arl3l1            | ARL3     | 0.63  | -1.78 |
| AW232572  | ADP-ribosylation factor-like protein 3                                                                                                                  | sl:ch211-208d15.4 | ARL3     | 1.77  | -0.30 |
| BG308473  | ADP-ribosylation factor-like 4, like                                                                                                                    | arl4l             | ARL4A    | -1.29 | -1.69 |
| AJ286835  | ADP-ribosylation factor-like 4Cb                                                                                                                        | arl4cb            | ARL4C    | -2.65 | -1.60 |
| BC052766  | ADP-ribosylation factor-like 8                                                                                                                          | arl8              | ARLSB    | -1.29 | -2.18 |
| BM035598  | LOC767691 sim to arginine-rich, mutated in early stage tumors                                                                                           | zgc:153327        | ARMET    | 4.19  | 1.30  |
| AY707650  | Aryl hydrocarbon receptor nuclear translocator                                                                                                          | arnt              | ARNT     | 1.78  | 0.90  |
| AF144689  | Aryl hydrocarbon receptor nuclear translocator-like 1a                                                                                                  | arntl1a           | ARNTL    | 2.81  | 1.60  |
| AW173877  | Actin related protein 2/3 complex, subunit 1A                                                                                                           | arpc1a            | ARPC1A   | 1.96  | 0.81  |
| BE557608  | LOC415190 sim to actin related protein 2/3 complex, subunit 1A, 41kDa                                                                                   | zgc:86896         | ARPC1A   | -2.33 | -1.36 |
| BI891122  | Actin related protein 2/3 complex, subunit 2                                                                                                            | arpc2             | ARPC2    | 1.01  | 1.64  |
| AW203061  | Actin related protein 2/3 complex, subunit 5A                                                                                                           | arpc5a            | ARPC5    | 1.55  | 1.70  |
| BI879038  | CAMP-regulated phosphoprotein 19a                                                                                                                       | arpp19a           | ARPP19   | 0.08  | 3.27  |
| BI879707  | Arrestin 3, retinal (X-arrestin), like                                                                                                                  | arr3l             | ARR3     | -2.11 | -1.01 |
| BI892004  | Arrestin, beta 2                                                                                                                                        | arrb2             | ARRB2    | 1.09  | 3.26  |
| BI876503  | Arsenate resistance protein 2                                                                                                                           | ars2              | ARS2     | 2.96  | -0.27 |
| BC083231  | N-acylsphingosine amidohydrolase (acid ceramidase) 1                                                                                                    | asah1             | ASAH1    | -0.21 | -3.77 |
| AB194413  | N-acylsphingosine amidohydrolase 2                                                                                                                      | asah2             | ASAH2    | -2.03 | -2.02 |
| BM181758  | Sim to ankyrin repeat and SOCS box-containing 3                                                                                                         | BM181758          | ASB3     | 0.01  | -3.45 |
| BM096034  | Ankyrin repeat and SOCS box-containing 8                                                                                                                | asb8              | ASB8     | 0.33  | -2.59 |
| BC055218  | Acetylserotonin O-methyltransferase-like                                                                                                                | asmtl             | ASMTL    | -3.51 | 2.57  |
| BE201971  | Asparagine synthetase                                                                                                                                   | asns              | ASNS     | 0.96  | 2.55  |
| BI672407  | Weak sim to asparaginase homolog (S. cerevisiae)                                                                                                        | LOC100006732      | ASPG     | -1.25 | -1.59 |
| AI877570  | LOC100124594 sim to ASPG: asparaginase homolog                                                                                                          | zgc:171644        | ASPG     | 1.94  | 1.37  |
| BI864195  | Intron of asph: aspartate beta-hydroxylase                                                                                                              | BI864195          | ASPH     | -2.73 | -1.58 |
| AW778181  | Asp (abnormal spindle)-like, microcephaly associated (Drosophila)                                                                                       | aspm              | ASPM     | 0.95  | -4.15 |
| BC081578  | Argininosuccinate synthetase                                                                                                                            | ass               | ASS1     | -4.11 | -1.72 |
| BM184227  | Ankyrin repeat, SAM and basic leucine zipper domain containing 1                                                                                        | asz1              | ASZ1     | -4.12 | -4.16 |
| BC081379  | ATPase family, AAA domain containing 1a                                                                                                                 | atad1a            | ATAD1    | 0.05  | -2.05 |
| BI534295  | LOC565827 sim to ataxia, cerebellar, Cayman type homolog                                                                                                | si:dkey-49m19.1   | ATCAY    | 2.19  | -0.22 |
| AW422298  | Activating transcription factor 3                                                                                                                       | atf3              | ATF3     | 1.33  | 2.01  |

|           |                                                                                                                                                       |                 |          |       |       |
|-----------|-------------------------------------------------------------------------------------------------------------------------------------------------------|-----------------|----------|-------|-------|
| AW420576  | Sim to activating transcription factor 5                                                                                                              | wu:fc14a10      | ATF5     | 3.76  | 3.73  |
| BM036484  | 3' end of atg4c   autophagy-related 4C                                                                                                                | BM036484        | ATG4C    | -1.26 | -2.15 |
| BM183879  | 5-aminoimidazole-4-carboxamide ribonucleotide formyltransferase/IMP cyclohydrolase                                                                    | atic            | ATIC     | 0.83  | -3.92 |
| AF286374  | ATPase, Na <sup>+</sup> /K <sup>+</sup> transporting, alpha 1a.2 polypeptide                                                                          | atp1a1a.2       | ATP1A1   | 0.37  | -1.66 |
| AY094620  | ATPase, Na <sup>+</sup> /K <sup>+</sup> transporting, alpha 1a.5 polypeptide                                                                          | atp1a1a.5       | ATP1A1   | -0.74 | -1.60 |
| AY008375  | ATPase, Na <sup>+</sup> /K <sup>+</sup> transporting, alpha 1b polypeptide                                                                            | atp1a1b         | ATP1A1   | -2.97 | -1.05 |
| BM172666  | ATPase, Na <sup>+</sup> /K <sup>+</sup> transporting, beta 1a polypeptide                                                                             | atp1b1a         | ATP1B1   | -3.41 | 1.54  |
| AF293369  | ATPase, Na <sup>+</sup> /K <sup>+</sup> transporting, beta 3b polypeptide                                                                             | atp1b3b         | ATP1B3   | -1.21 | -4.46 |
| BM185985  | ATPase, Ca <sup>++</sup> transporting, cardiac muscle, fast twitch 1 like                                                                             | atp2a11         | ATP2A1   | -4.33 | 1.39  |
| BI896301  | Sim to ATPase, Ca <sup>++</sup> transporting, cardiac muscle, fast twitch 1                                                                           | wu:cegs655      | ATP2A1   | -1.05 | -3.26 |
| BI891329  | ATPase, Ca <sup>++</sup> transporting, cardiac muscle, slow twitch 2b                                                                                 | atp2a2b         | ATP2A2   | 3.15  | 3.40  |
| BI864494  | ATPase, Ca <sup>++</sup> transporting, plasma membrane 2                                                                                              | atp2b2          | ATP2B2   | -2.01 | -1.32 |
| BI980991  | 3' end of atp2b4: ATPase, Ca <sup>++</sup> transporting, plasma membrane 4 and 3' to zgc:174320                                                       | BI980991        | ATP2B4   | -1.83 | -0.81 |
| AW342634  | ATPase, H <sup>+</sup> transporting, lysosomal 70kDa, V1 subunit A, like                                                                              | atp6v1al        | ATP6V1A  | -0.89 | 2.78  |
| BC045370  | ATPase, H <sup>+</sup> transporting, V1 subunit D                                                                                                     | atp6v1d         | ATP6V1D  | 2.45  | 1.23  |
| BG883692  | Sim to ATRX   alpha thalassemia/mental retardation syndrome X-linked                                                                                  | LOC568580       | ATRX     | 1.76  | 1.15  |
| AJ957736  | Aurora kinase B                                                                                                                                       | aurkb           | AURKB    | -1.53 | -0.99 |
| BC067695  | Serine/threonine kinase a (aurora kinase B)                                                                                                           | stka            | AURKB    | -2.05 | -5.45 |
| AW076951  | Oxytocin-like                                                                                                                                         | oxtl            | AVP      | 2.20  | 0.46  |
| AB032263  | Axin 2 (conductin, axil)                                                                                                                              | axin2           | AXIN2    | -0.12 | -1.99 |
| BF717552  | Beta-2 microglobulin                                                                                                                                  | zgc:64161       | B2M      | -3.71 | -1.07 |
| AF321830  | UDP-GlcNAc:betaGal beta-1,3-N-acetylglucosaminyltransferase 3-like                                                                                    | zgc:86586       | B3GNT3   | 1.07  | 1.57  |
| AF321829  | Beta-3-galactosyltransferase (sim to UDP-GlcNAc:betaGal beta-1,3-N-acetylglucosaminyltransferase 7)                                                   | zgc:91787       | B3GNT7   | -2.93 | -1.95 |
| AW154318  | Sim to BACE2   beta-site APP-cleaving enzyme 2                                                                                                        | wu:fi26d02      | BACE2    | 1.63  | 0.54  |
| BI867065  | BCL2-antagonist of cell death                                                                                                                         | bad             | BAD      | -1.10 | -1.77 |
| AJ721437  | BCL2-associated athanogene 2                                                                                                                          | bag2            | BAG2     | -0.17 | 2.22  |
| BM317353  | Sim to BCL2-associated athanogene 2                                                                                                                   | BM317353        | BAG2     | -2.22 | -1.15 |
| AF239925  | BMP and activin membrane-bound inhibitor (Xenopus laevis) homolog                                                                                     | bambi           | BAMBI    | 1.05  | 2.23  |
| BI891654  | Bcl2-associated X protein, a                                                                                                                          | baxa            | BAX      | 0.97  | -2.32 |
| BC049014  | B-cell receptor-associated protein 31                                                                                                                 | bcap31          | BCAP31   | 2.55  | 1.29  |
| BE201801  | Weak sim to breast cancer anti-estrogen resistance 3                                                                                                  | LOC795201       | BCAR3    | 1.35  | 1.68  |
| BG308582  | Branched chain aminotransferase 1, cytosolic                                                                                                          | bcatl           | BCAT1    | -0.08 | -2.36 |
| BG305296  | BRCA2 and CDKN1A interacting protein                                                                                                                  | bccip           | BCCIP    | 0.28  | -2.30 |
| AF160641  | Sim to B-cell CLL/lymphoma 11B (zinc finger protein)                                                                                                  | si:dkcy-7112.1  | BCL11B   | 3.28  | 1.53  |
| AY695820  | B-cell leukemia/lymphoma 2                                                                                                                            | bcl2            | BCL2     | 1.49  | 2.34  |
| AF317837  | Bcl2-like                                                                                                                                             | bcl2l           | BCL2L1   | -1.84 | 2.42  |
| BI984364  | BCL2-like 13 (apoptosis facilitator)                                                                                                                  | bcl2l13         | BCL2L13  | -1.87 | -2.19 |
| BM081091  | Intergenic 3' to bcl6: B-cell CLL/lymphoma 6 (zinc finger protein 51) and 5' to LOC100150110: sim to polyprotein                                      | BM081091        | BCL6     | -1.37 | -2.51 |
| AJ290391  | Beta-carotene 15, 15-dioxygenase 2, like                                                                                                              | bcdo2l          | BCO2     | 0.10  | 2.00  |
| BI670989  | LOC560226 sim to breakpoint cluster region                                                                                                            | DKEY-91M11.5    | BCR      | 2.46  | 1.61  |
| AJ878399  | 3' end of LOC100002003 weak similar to B double prime 1, subunit of RNA polymerase III transcription initiation factor IIIB and 5' to zgc:101635      | wu:fc57d05      | BDP1     | -1.53 | 0.73  |
| AJ497232  | Betaine-homocysteine methyltransferase                                                                                                                | bhmt            | BHMT     | -3.69 | -3.51 |
| AF442500  | Baculoviral IAP repeat-containing 2                                                                                                                   | birc2           | BIRC2    | -0.62 | 2.64  |
| AY057057  | Baculoviral IAP repeat-containing 5a                                                                                                                  | birc5a          | BIRC5    | -1.15 | 3.11  |
| AY057058  | Baculoviral IAP repeat-containing 5B                                                                                                                  | birc5b          | BIRC5    | -0.73 | 1.89  |
| BC095221  | LOC553608 sim to transducin (beta)-like 1 X-linked receptor 1                                                                                         | zgc:110312      | BLXR1    | 2.98  | 1.29  |
| AB038320  | Bladder cancer associated protein                                                                                                                     | blcap           | BLCAP    | 1.51  | -2.43 |
| BM104315  | Basic leucine zipper nuclear factor 1                                                                                                                 | blzf1           | BLZF1    | -1.14 | -2.36 |
| AW059234  | Bone morphogenetic protein 1a                                                                                                                         | bmp1a           | BMP1     | 1.54  | -1.44 |
| NM_131342 | Bone morphogenetic protein 4                                                                                                                          | bmp4            | BMP4     | -2.50 | -0.98 |
| BC054647  | Bone morphogenetic protein 5                                                                                                                          | bmp5            | BMP5     | -2.88 | -0.36 |
| BG302761  | Bone morphogenetic protein 8                                                                                                                          | bmp8            | BMP8B    | -1.80 | -1.21 |
| BC081626  | Bone morphogenetic protein receptor, type IA, b                                                                                                       | bmpr1ab         | BMPRIA   | -1.15 | -2.25 |
| AJ878495  | Sim to bone morphogenetic protein receptor, type IB                                                                                                   | AJ878495        | BMPRIB   | -0.93 | -4.42 |
| AF793560  | Sim to basoonin 1                                                                                                                                     | LOC568786       | BNC1     | -1.69 | -1.85 |
| NM_201218 | BCL2adenovirus E1B interacting protein 2                                                                                                              | bnip2           | BNIP2    | -2.62 | 1.97  |
| AJ477329  | 3' end of bnip3l2   BCL2adenovirus E1B interacting protein 3-like, 2 and 5' to LOC798555 sim to DPYSL2   dihydropyrimidinase-like 2                   | AJ477329        | BNIP3L   | 1.01  | 2.46  |
| AW420488  | BCL2adenovirus E1B interacting protein 3-like                                                                                                         | bnip3l          | BNIP3L   | -0.59 | 2.24  |
| BC078217  | BCL2-related ovarian killer a                                                                                                                         | boka            | BOK      | 0.36  | -2.06 |
| BC075949  | LOC436903 sim to 2,3-bisphosphoglycerate mutase                                                                                                       | zgc:92230       | BPGM     | -1.72 | -3.19 |
| BM156875  | 3'(2), 5'-bisphosphate nucleotidase 1                                                                                                                 | bpnt1           | BPNT1    | -2.19 | 1.55  |
| AW128614  | Bromodomain containing 7                                                                                                                              | brd7            | BRD7     | 1.48  | 1.53  |
| BI710320  | Intron of LOC564701   similar to BR serine/threonine-protein kinase 2                                                                                 | BI710320        | BRSK2    | 2.65  | 0.29  |
| AW343700  | 3' end of brunol5; bruno-like 5, RNA binding protein and 3' end of zgc:66326 sim to RGMb; RGM domain family, member B                                 | wu:fi48e05      | BRUNOL5  | -1.70 | -1.74 |
| BI878208  | Basigin                                                                                                                                               | bsg             | BSG      | 0.43  | 2.05  |
| BG306459  | Basic transcription factor 3                                                                                                                          | btf3            | BTF3     | 0.53  | 3.06  |
| BC056691  | B-cell translocation gene 1                                                                                                                           | btg1            | BTG1     | -2.63 | -3.94 |
| BM071805  | B-cell translocation gene 4                                                                                                                           | btg4            | BTG4     | -5.02 | -5.85 |
| BE605308  | Basic leucine zipper and W2 domains 1b                                                                                                                | bzw1b           | BZW2     | -1.80 | -3.11 |
| BI983582  | Sim to chromosome 11 open reading frame 9                                                                                                             | BI983582        | C11orf9  | 2.65  | 1.74  |
| BI888368  | LOC431737 sim to response gene to complement 32                                                                                                       | zgc:91870       | C13orf15 | -2.22 | -0.45 |
| BI889079  | LOC436755 sim to chromosome 19 open reading frame 10                                                                                                  | zgc:92871       | C19orf10 | 5.35  | 2.15  |
| BI705710  | Sim to core 1 synthase, glycoprotein-N-acetylgalactosamine 3-beta-galactosyltransferase, 1                                                            | BI705710        | C1GALT1  | 0.92  | 2.89  |
| BM777196  | 3' end of zgc:165409; LOC797807: weak sim to C1orf25: chromosome 1 open reading frame 25 and 3' to LOC100002264: sim to BBS9: Bardet-Biedl syndrome 9 | BM777196        | C1orf25  | 1.97  | 0.76  |
| BC096887  | LOC560927 sim to complement component 1, s subcomponent                                                                                               | zgc:112309      | C1S      | 3.35  | 1.90  |
| BI705186  | GC-rich sequence DNA-binding factor candidate                                                                                                         | zgc:158234      | C21orf66 | -1.10 | 3.25  |
| AJ588354  | 3' end of DKEY-75L1.5 sim to C3   complement component 3                                                                                              | AJ588354        | C3       | 1.80  | 2.87  |
| AF222510  | Complement component c3b                                                                                                                              | c3b             | C3       | 0.95  | 4.95  |
| AF047415  | Complement component c3c                                                                                                                              | c3c             | C3       | 5.65  | 6.12  |
| AF047413  | Complement component c3a                                                                                                                              | si:dkcy-76b14.4 | C3       | 1.30  | 1.92  |
| BI708361  | LOC641323 sim to chromosome 3 open reading frame 31                                                                                                   | zgc:123195      | C3orf31  | 3.43  | 0.79  |
| BF717375  | Complement component 8, gamma polypeptide                                                                                                             | c8g             | CRG      | 1.83  | 5.23  |
| AW281891  | Sim to chromosome 8 open reading frame 4                                                                                                              | wu:fj58g06      | C8orf4   | 2.23  | 1.25  |
| CF594673  | Complement component 9                                                                                                                                | c9              | C9       | 2.66  | 4.21  |
| AJ723264  | 3' end of LOC557314 sim to C9orf89 and 3' to LOC100150223 similar to ninjurin 1                                                                       | AJ723264        | C9orf89  | 1.70  | 0.64  |
| BC095649  | Adenylate kinase-like                                                                                                                                 | zgc:112030      | C9orf98  | -1.52 | -0.75 |
| US5177    | Carbonic anhydrase                                                                                                                                    | cahz            | CA2      | -1.47 | 2.55  |
| BF938524  | Carbonic anhydrase VII                                                                                                                                | ca7             | CA7      | -0.82 | -5.26 |
| AW171091  | Calcium binding protein 39, like 1                                                                                                                    | cab39l          | CAB39    | 1.68  | 0.68  |
| BC085674  | LOC492361 sim to calcium binding protein 39-like                                                                                                      | zgc:92575       | CAB39L   | 3.61  | 0.81  |
| BI865668  | Intron of caena1ab   calcium channel, voltage-dependent, P/Q type, alpha 1A subunit, b                                                                | BI865668        | CACNA1A  | 2.36  | 1.35  |
| BI879509  | Intron of LOC100151242 sim to CACNA1D   calcium channel, voltage-dependent, L type, alpha 1D subunit                                                  | BI879509        | CACNA1D  | 0.70  | 2.46  |
| AY528224  | Calcium channel, voltage-dependent, L type, alpha 1D subunit                                                                                          | caena1d         | CACNA1D  | 0.65  | 2.49  |
| AY495698  | Calcium channel, voltage-dependent, L type, alpha 1S subunit                                                                                          | caena1s         | CACNA1S  | -3.17 | -1.66 |
| BC057439  | Calcium channel, voltage-dependent, gamma subunit 2                                                                                                   | caeng2          | CACNG2   | -0.26 | -2.74 |
| AJ721634  | Carbamoyl-phosphate synthetase 2, aspartate transcarbamylase, and dihydroorotase                                                                      | cad             | CAD      | -0.79 | -2.25 |
| BC076343  | Calcitonin/calcitonin-related polypeptide, alpha                                                                                                      | calca           | CALCB    | 6.51  | 0.71  |
| BI670912  | Calmodulin 1b                                                                                                                                         | calml1b         | CALM2    | 1.42  | 2.60  |
| AW128363  | Calmodulin 2a (phosphorylase kinase, delta)                                                                                                           | calm2a          | CALM2    | 0.45  | 1.58  |
| AJ331854  | Calmodulin 2b, (phosphorylase kinase, delta)                                                                                                          | calm2b          | CALM2    | -0.74 | -2.23 |
| AF195882  | Calreticulin                                                                                                                                          | calr            | CALR     | 3.47  | 2.60  |
| NM_201465 | Calreticulin like                                                                                                                                     | calrl           | CALR     | 3.64  | 3.80  |
| BG302583  | Calreticulin, like 2: sim to epidermal growth factor receptor pathway substrate 15                                                                    | calrl2          | CALR     | 3.07  | 3.53  |
| BC093372  | Calcium/calmodulin-dependent protein kinase (CaM kinase) II alpha                                                                                     | camk2a          | CAMK2A   | 4.76  | -1.91 |

|          |                                                                                                                                                          |                  |          |       |       |
|----------|----------------------------------------------------------------------------------------------------------------------------------------------------------|------------------|----------|-------|-------|
| BM070854 | Calcium/calmodulin-dependent protein kinase (CaM kinase) II delta 2                                                                                      | camk2d2          | CAMK2D   | 2.22  | 2.17  |
| AW232670 | Calmegin                                                                                                                                                 | clgn             | CANX     | -1.45 | 1.63  |
| BG727337 | 3' end of LOC570311 similar to calpain 10 and 5' to zgc:110542(sim to EIF4E2)                                                                            | casc3            | CAPN10   | 3.89  | -1.12 |
| BC095045 | Calpain 2, (m/II) large subunit b                                                                                                                        | capn2b           | CAPN2    | -2.69 | -3.02 |
| AI396726 | Calpain 2, (m/II) large subunit, like                                                                                                                    | capn2l           | CAPN2    | -2.71 | -1.86 |
| AW281444 | Calpain, small subunit 1                                                                                                                                 | capns1           | CAPNS1   | -3.00 | -2.34 |
| BM181708 | Caprin family member 2                                                                                                                                   | caprin2          | CAPRN2   | -3.02 | -5.04 |
| AI722206 | Capping protein (actin filament) muscle Z-line, beta                                                                                                     | capzb            | CAPZB    | 2.62  | 0.37  |
| BC056576 | Calcium regulated heat stable protein 1                                                                                                                  | carhsp1          | CARHSP1  | 0.12  | -1.95 |
| AW202784 | CysteinyI-RNA synthetase                                                                                                                                 | cars             | CARS     | 1.16  | 2.67  |
| AW115856 | Sim to cysteinyI-RNA synthetase 2, mitochondrial (putative)                                                                                              | st.ch211-198k9.5 | CARS2    | 3.21  | 3.84  |
| AW076882 | Cancer susceptibility candidate 3 (metastatic lymph node 51)                                                                                             | casc3            | CASC3    | -1.17 | 2.68  |
| AF252546 | Calcium/calmodulin-dependent serine protein kinase                                                                                                       | casck            | CASK     | 2.55  | 2.35  |
| AF233434 | Caspase a                                                                                                                                                | caspa            | CASP1    | -0.42 | -2.08 |
| AF327410 | Caspase b                                                                                                                                                | caspb            | CASP1    | -1.04 | -2.07 |
| AW466695 | Caspase 3, apoptosis-related cysteine protease a                                                                                                         | casps3a          | CASP3    | -1.43 | -2.33 |
| BC083437 | Caspase 6, apoptosis-related cysteine peptidase, like 1                                                                                                  | casps6l1         | CASP6    | -1.53 | -2.38 |
| AF273220 | Caspase 8, apoptosis-related cysteine peptidase                                                                                                          | casps8           | CASP8    | -1.90 | -2.47 |
| BI673444 | CASP8 associated protein 2                                                                                                                               | casps8ap2        | CASP8AP2 | 1.00  | -1.79 |
| AW116368 | Calsequestrin-like                                                                                                                                       | zgc:100957       | CASQ1    | -2.02 | -2.16 |
| BG308575 | LOC559053 sim to Castor zinc finger 1                                                                                                                    | casz1            | CASZ1    | -1.20 | -1.55 |
| AF170069 | Catalase                                                                                                                                                 | cat              | CAT      | -0.27 | 2.00  |
| AW595386 | Caveolin 1                                                                                                                                               | cav1             | CAV1     | -0.63 | 2.99  |
| AI666893 | Cas-Br-M (murine) ecotropic retroviral transforming sequence                                                                                             | cbl              | CBL      | 0.49  | 2.03  |
| BE201648 | Cas-Br-M (murine) ecotropic retroviral transforming sequence b                                                                                           | cb1b             | CBLB     | 1.21  | -1.54 |
| BC092758 | LOC550551 sim to chromobox homolog 7                                                                                                                     | zgc:110152       | CBX7     | 3.44  | 0.84  |
| BM102459 | LOC795788 sim to chemokine (C-C motif) ligand 21                                                                                                         | LOC795788        | CCL21    | -1.11 | 4.04  |
| BM155325 | Chemokine CCL-C10b (weak sim to chemokine (C-C motif) ligand 28/27/25)                                                                                   | LOC794616        | CCL28    | -2.21 | -0.96 |
| AF234784 | Cyclin A2                                                                                                                                                | ccna2            | CCNA2    | -0.77 | 5.68  |
| AB040435 | Cyclin B1                                                                                                                                                | ccnb1            | CCNB1    | 5.48  | 7.85  |
| AW422010 | Cyclin B2                                                                                                                                                | ccnb2            | CCNB2    | 1.61  | 4.85  |
| BI886477 | Cyclin B3                                                                                                                                                | zgc:153369       | CCNB3    | -2.94 | -1.07 |
| X87581   | Cyclin D1                                                                                                                                                | ccnd1            | CCND1    | 2.32  | 3.37  |
| X83594   | Cyclin E                                                                                                                                                 | ccne             | CCNE1    | 1.29  | 3.71  |
| BI672128 | Cyclin F                                                                                                                                                 | ccnf             | CCNF     | -0.87 | 2.31  |
| AI959372 | Cyclin G1                                                                                                                                                | ccng1            | CCNG1    | 0.54  | 2.52  |
| BE556826 | Cyclin G2                                                                                                                                                | ccng2            | CCNG2    | 1.88  | 1.97  |
| AW116346 | Chaperonin containing TCP1, subunit 2 (beta)                                                                                                             | ect2             | CCT2     | 0.54  | 3.29  |
| AI964352 | Chaperonin containing TCP1, subunit 3 (gamma)                                                                                                            | ect3             | CCT3     | -1.98 | 0.77  |
| BG303560 | Chaperonin containing TCP1, subunit 4 (delta)                                                                                                            | ect4             | CCT4     | -1.84 | 2.56  |
| AI964322 | Chaperonin containing TCP1, subunit 5 (epsilon)                                                                                                          | ect5             | CCT5     | 1.95  | 0.73  |
| BI888169 | Chaperonin containing TCP1, subunit 6A (zeta 1)                                                                                                          | ect6a            | CCT6A    | -0.44 | 1.55  |
| BE557308 | Chaperonin containing TCP1, subunit 7 (eta)                                                                                                              | ect7             | CCT7     | -0.65 | 1.78  |
| AW059098 | Chaperonin containing TCP1, subunit 8 (theta)                                                                                                            | ect8             | CCT8     | -1.33 | 1.57  |
| BC076048 | CD36 antigen                                                                                                                                             | cd36             | CD36     | -1.47 | -5.42 |
| AW344023 | Weak sim to CD44   CD44 molecule (Indian blood group)                                                                                                    | wu:fa99e04       | CD44     | -3.47 | -3.41 |
| AI436876 | Intron of LOC100003927 weak sim to CD58   CD58 molecule and 3' to of sidkey-19a16.7 weak sim to LY9   lymphocyte antigen 9                               | wu:fb34b02       | CD58     | -3.39 | -2.94 |
| AW019276 | Cd63 antigen                                                                                                                                             | cd63             | CD63     | -0.50 | 2.44  |
| AF114830 | Invariant chain-like protein 1                                                                                                                           | ic1p1            | CD74     | -2.68 | 3.40  |
| AF116539 | Invariant chain-like protein 2                                                                                                                           | ic1p2            | CD74     | -2.32 | 0.65  |
| AI353506 | CD9 antigen (p24)                                                                                                                                        | cd9              | CD9      | 2.70  | 4.61  |
| BI888934 | CD99 antigen-like 2                                                                                                                                      | cd99l2           | CD99L2   | 0.45  | 2.57  |
| AI721645 | Cell division cycle 2                                                                                                                                    | cdc2             | CDC2     | 0.97  | 2.34  |
| AW116246 | Cell division cycle 20 homolog                                                                                                                           | cdc20            | CDC20    | -0.51 | 5.55  |
| AW059106 | Intron of cdc23   CDC23 (cell division cycle 23, yeast, homolog)                                                                                         | AW059106         | CDC23    | 3.17  | 0.65  |
| AF212941 | Cdc25 (sim to cell division cycle 25 homolog A)                                                                                                          | cdc25            | CDC25A   | 1.54  | 3.56  |
| BM037003 | Cell division cycle 27                                                                                                                                   | cdc27            | CDC27    | 1.08  | 2.34  |
| AY398322 | Cell division cycle 42                                                                                                                                   | cdc42            | CDC42    | 1.28  | 1.56  |
| AI964255 | LOC558275 sim to CDC42 effector protein (Rho GTPase binding) 5                                                                                           | zgc:153966       | CDC42    | -0.74 | 2.35  |
| BM184190 | CD42 effector protein (Rho GTPase binding) 4                                                                                                             | cdc42ep4         | CDC42EP4 | 0.63  | 2.80  |
| BG303845 | CD42 small effector 1                                                                                                                                    | cdc42se1         | CDC42SE1 | -1.93 | -1.68 |
| BI891546 | Cell division cycle 45-like                                                                                                                              | cdc45l           | CDC45L   | 1.36  | 3.37  |
| AW171211 | CDCS cell division cycle 5-like (S. pombe)                                                                                                               | cdc5l            | CDC5L    | 0.44  | 2.20  |
| AW165153 | Cell division cycle 73, Paf1/RNA polymerase II complex component, homolog                                                                                | cdc73            | CDC73    | 0.57  | 2.05  |
| BI704246 | Cell division cycle associated 8-like                                                                                                                    | cdca8l           | CDCA8    | -0.15 | -2.04 |
| AW076614 | 3' end of LOC568392 sim to CDH1   cadherin 1, type 1, E-cadherin and intron of LOC100150592 sim TPase                                                    | AW076614         | CDH1     | 1.31  | 4.37  |
| U41419   | Cadherin 11, osteoblast                                                                                                                                  | cdh11            | CDH11    | -0.72 | -0.72 |
| AF428098 | Cadherin 17, LI cadherin (liver-intestine)                                                                                                               | cdh17            | CDH17    | 0.38  | -2.89 |
| X67648   | Cadherin 2, neuronal                                                                                                                                     | cdh2             | CDH2     | 2.90  | 5.35  |
| AY496430 | Cadherin 5 (vascular endothelium)                                                                                                                        | cdh5             | CDH5     | 3.18  | 2.29  |
| BI865765 | CDP-diacylglycerol--inositol 3-phosphatidylinositol synthase (phosphatidylinositol synthase)                                                             | cdipt            | CDIPT    | 0.61  | 2.11  |
| BC076283 | LOC346788 sim to cyclin-dependent kinase 5, regulatory subunit 1 (p35)                                                                                   | zgc:92814        | CDK5R1   | -2.14 | -1.95 |
| BI886693 | Cyclin-dependent kinase 8                                                                                                                                | cdk8             | CDK8     | 2.20  | 3.36  |
| AF398516 | Cyclin-dependent kinase inhibitor 1b (p27, kip1)                                                                                                         | cdkn1b           | CDKN1B   | -1.29 | -2.13 |
| BI884002 | Cyclin-dependent kinase inhibitor 1b, like (p27, Kip1)                                                                                                   | cdkn1bl          | CDKN1B   | -1.21 | -2.03 |
| AI957754 | Transcribed locus sim to cysteine dioxygenase, type I                                                                                                    | AI957754         | CDO1     | 4.09  | 0.66  |
| BC055505 | CDP-diacylglycerol synthase (phosphatidate cytidylyltransferase) 2                                                                                       | cds2             | CDS2     | 2.11  | 0.70  |
| BG307558 | Chromatin licensing and DNA replication factor 1                                                                                                         | wu:fi38h09       | CDT1     | -1.38 | -3.08 |
| BI983420 | CCAAT/enhancer binding protein (C/EBP), gamma                                                                                                            | cebpg            | CEBPG    | -1.21 | 2.06  |
| AF384217 | Cat eye syndrome chromosome region, candidate 1a                                                                                                         | ceer1a           | CECR1    | 1.29  | 2.26  |
| BC065350 | LOC402927 sim to cat eye syndrome chromosome region, candidate 5                                                                                         | zgc:77375        | CECR5    | 2.11  | 1.55  |
| BM154534 | Carboxyl ester lipase, tandem duplicate 1                                                                                                                | cel1             | CEL      | 2.41  | -0.66 |
| AF003943 | Carboxyl ester lipase, tandem duplicate 2                                                                                                                | cel2             | CEL      | -2.50 | -1.41 |
| AW115513 | LOC554144 sim to elastase 1, pancreatic                                                                                                                  | zgc:112266       | CELA1    | -3.30 | -2.97 |
| AW019487 | LOC445282 sim to elastase 1, pancreatic                                                                                                                  | zgc:92041        | CELA1    | -3.59 | -2.97 |
| BC085565 | LOC445032 sim to elastase 1, pancreatic                                                                                                                  | zgc:92745        | CELA1    | -3.37 | -2.65 |
| BI705588 | Elastase 2                                                                                                                                               | ela2             | CELA2A   | -3.20 | -0.11 |
| AI558632 | Elastase 3 like                                                                                                                                          | ela3l            | CELA2A   | -3.75 | -2.11 |
| BQ260752 | Sim to centromere protein F, 350/400ka (mitosin)                                                                                                         | BQ260752         | CENPF    | 2.91  | -1.04 |
| AB110416 | Charon weak sim to Cerberus                                                                                                                              | cha              | CER1     | 0.15  | 2.22  |
| AF047412 | Complement component b1b                                                                                                                                 | b1b              | CFB      | 1.82  | 4.28  |
| U34662   | Complement factor B                                                                                                                                      | cfb              | CFB      | 3.50  | 5.11  |
| BF717453 | LOC794927 weak sim to complement factor H                                                                                                                | ch               | CFH      | 4.00  | 4.32  |
| BC085367 | LOC492777 weak sim to complement factor H                                                                                                                | zgc:101554       | CFH      | 5.39  | 3.62  |
| BI887110 | Cholesterol 25-hydroxylase                                                                                                                               | st:dky-24111.8   | CH25H    | -1.74 | -1.70 |
| AW128293 | Chromatin assembly factor 1, subunit A (p150)                                                                                                            | chaf1a           | CHAF1A   | -2.62 | -4.35 |
| BC085514 | LOC492522 weak sim to coiled-coil-helix-coiled-coil domain containing 3                                                                                  | zgc:103414       | CHCHD3   | 2.59  | -0.86 |
| AI722567 | Sim to chromodomain helicase DNA binding protein 7                                                                                                       | LOC569471        | CHD7     | 2.71  | 1.17  |
| AW116064 | LOC406323 sim to chitinase, acidic                                                                                                                       | zgc:56053        | CHIA     | -2.86 | -6.47 |
| BC054696 | Chitinase domain containing 1                                                                                                                            | chid1            | CHID1    | 2.10  | 2.20  |
| AW019809 | Choline kinase alpha (chka)                                                                                                                              | chka             | CHKA     | 2.03  | 2.81  |
| AW567276 | 3' end of ch11: camel and 5' end to LOC564085: sim to Dynein heavy chain 5, axonemal (Ciliary dynein heavy chain 5) (Axonemal beta dynein heavy chain 5) | wu:fb36h04       | CHL1     | -2.20 | -1.71 |
| BM172681 | Putative breast adenocarcinoma marker                                                                                                                    | bc2              | CHMP2A   | -1.78 | 0.45  |
| BI702909 | Intron of chmp4c   chromatin modifying protein 4C                                                                                                        | BI702909         | CHMP4C   | 2.19  | -0.49 |
| AW420779 | 3' end of zgc:63904 sim to CHIP   calcium binding protein P22 and 5' to kbdrbs1a   KH domain containing, RNA binding, signal transduction associated 1a  | AW420779         | CHP      | 1.59  | 0.57  |
| BC054566 | LOC325361 sim to calcium binding protein P22                                                                                                             | zgc:63904        | CHP      | -1.04 | -1.51 |
| AI558830 | Choline phosphotransferase 1                                                                                                                             | chpt1            | CHPT1    | -0.57 | 2.24  |
| AI477959 | Intron of chpt1   choline phosphotransferase 1                                                                                                           | wu:fb49f01       | CHPT1    | 1.92  | -1.11 |

|          |                                                                                                                                                                              |                    |          |       |       |
|----------|------------------------------------------------------------------------------------------------------------------------------------------------------------------------------|--------------------|----------|-------|-------|
| AA497144 | Cholinergic receptor, nicotinic, delta polypeptide                                                                                                                           | chrnd              | CHRND    | -2.30 | -0.59 |
| AI667408 | Carbohydrate (chondroitin) synthase 1                                                                                                                                        | chys1              | CHSY1    | -2.76 | -0.67 |
| AI957909 | CILP protein                                                                                                                                                                 | CILP               | CILP     | -2.24 | -0.66 |
| BC049529 | Creatine kinase, brain                                                                                                                                                       | ekb                | CKB      | -3.82 | -0.51 |
| AY036972 | Creatine kinase, muscle a                                                                                                                                                    | ekma               | CKM      | -5.01 | -1.01 |
| BM005084 | Cytoplasmic linker associated protein 2                                                                                                                                      | clasp2             | CLASP2   | -2.64 | 0.11  |
| AA566843 | LOC565961 weak sim to chloride channel, calcium activated, family member 4                                                                                                   | LOC565961          | CLCA4    | -1.94 | -3.64 |
| AI793436 | Intron of wu:fb78c02.L sim to CLCN3: chloride channel 3                                                                                                                      | wu:fb78c02.L       | CLCN3    | 2.79  | 2.81  |
| AI667530 | LOC393353 sim to chloride channel Ka                                                                                                                                         | zgc:64141          | CLCNKA   | -2.68 | 1.49  |
| AF359427 | Claudin 10-like 1a                                                                                                                                                           | cldn101a           | CLDN10   | 1.39  | 3.22  |
| BC081634 | Claudin 2                                                                                                                                                                    | cldn2              | CLDN14   | 1.28  | 1.98  |
| BC054577 | Claudin 15 like                                                                                                                                                              | cldn15l            | CLDN15   | -1.01 | -1.93 |
| BE606011 | 3' end of LOC567620   similar to claudin 23 and 5' to LOC553515                                                                                                              | BE606011           | CLDN23   | 1.32  | -1.86 |
| BI888493 | Weak sim to claudin 23                                                                                                                                                       | LOC553515          | CLDN23   | -2.24 | -1.68 |
| AF359434 | Claudin h (sim to claudin 3)                                                                                                                                                 | cldnh              | CLDN3    | -2.58 | 0.41  |
| AF359428 | Claudin i                                                                                                                                                                    | eldni              | CLDN3    | -5.66 | -1.14 |
| AF359423 | Claudin a                                                                                                                                                                    | eldna              | CLDN4    | -4.34 | -1.15 |
| AF359426 | Claudin b                                                                                                                                                                    | eldnb              | CLDN4    | -4.14 | -0.48 |
| AJ011789 | Claudin d                                                                                                                                                                    | eldnd              | CLDN4    | -8.73 | -6.97 |
| AF359425 | Claudin e                                                                                                                                                                    | eldne              | CLDN4    | -2.15 | -0.20 |
| AF359424 | Claudin f                                                                                                                                                                    | eldnf              | CLDN4    | -3.46 | -0.88 |
| AJ011790 | LOC678651 sim to claudin 4                                                                                                                                                   | clndg              | CLDN4    | -5.27 | -6.94 |
| AF260240 | Claudin 7                                                                                                                                                                    | clnd7              | CLDN7    | -2.05 | -0.54 |
| BC075926 | Claudin 7 like                                                                                                                                                               | zgc:92192          | CLDN7    | -0.95 | -2.87 |
| BE605983 | LOC550497 sim to claudin 8                                                                                                                                                   | zgc:110333         | CLDN8    | -3.33 | -2.62 |
| BG883654 | 3' end of LOC568355 sim to C-type lectin domain family 11 member A precursor (Stem cell growth factor) (Lymphocyte secreted C-type lectin)                                   | BG883654           | CLEC11A  | 1.86  | 1.92  |
| BI842255 | Chloride intracellular channel 2                                                                                                                                             | clic2              | CLIC2    | -2.14 | 2.30  |
| AW420312 | Sim to chloride intracellular channel 4                                                                                                                                      | AW420312           | CLIC4    | -0.63 | -1.63 |
| BG305441 | CDC-like kinase 4                                                                                                                                                            | clk4               | CLK4     | -0.51 | 2.37  |
| AF133306 | Clock                                                                                                                                                                        | clock              | CLOCK    | 1.34  | 3.80  |
| AI396704 | Intergenic 5' end to carm1   coactivator-associated arginine methyltransferase 1 and 5' end to clpp: ClpP caseinolytic peptidase, ATP-dependent, proteolytic subunit homolog | si:dkey-204f1.1.64 | CLPP     | -1.54 | -0.99 |
| BG728815 | Clathrin, heavy polypeptide a (Hc)                                                                                                                                           | cltca              | CLTC     | 1.07  | 3.21  |
| AW077466 | Clusterin (complement lysis inhibitor, SP-40,40, sulfated glycoprotein 2, testosterone-repressed prostate message 2, apolipoprotein J)                                       | clu                | CLU      | -1.73 | -1.46 |
| BC065587 | Connector enhancer of kinase suppressor of Ras 1                                                                                                                             | cnksr1             | CNKSR1   | -1.25 | -1.81 |
| AW078462 | Calponin 3, acidic                                                                                                                                                           | cnna3              | CNN3     | 1.23  | 3.72  |
| BM036376 | Similar to cyclin M2                                                                                                                                                         | LOC565702          | CNNM2    | -2.16 | -1.48 |
| BE201503 | Sim to component of oligomeric golgi complex 3                                                                                                                               | im:7147618         | COG3     | -2.55 | -0.53 |
| AF192763 | Collagen type XI alpha-2                                                                                                                                                     | coll1a2            | COL11A2  | -1.75 | -1.34 |
| AI584441 | Intron of LOC792499   similar to collagen XIV and 5' to LOC792570 similar to zinc-fingers and homeoboxes 2                                                                   | wu:fb93g03         | COL14A1  | -2.29 | -2.44 |
| BI671608 | Im:7142837 sim to collagen, type XVI, alpha 1                                                                                                                                | im:7142837         | COL16A1  | -2.52 | -3.32 |
| BE605535 | Sim to collagen, type XVII, alpha 1                                                                                                                                          | wu:fb89a06         | COL17A1  | -2.80 | -2.01 |
| BM025541 | Collagen type XVIII, alpha 1                                                                                                                                                 | coll18a1           | COL18A1  | 1.71  | 2.68  |
| AJ318212 | Collagen, type I, alpha 1                                                                                                                                                    | coll1a1            | COL1A1   | -4.70 | -3.25 |
| AJ318214 | Collagen, type I, alpha 3                                                                                                                                                    | coll1a3            | COL1A1   | -4.28 | -0.25 |
| AJ318213 | Collagen, type I, alpha 2                                                                                                                                                    | coll1a2            | COL1A2   | -4.72 | 1.92  |
| AI331578 | LOC563353 sim to collagen, type XXI, alpha 1                                                                                                                                 | si:ch211-106n13.3  | COL21A1  | 6.92  | 2.36  |
| BI879661 | Collagen type II, alpha-1a                                                                                                                                                   | col2a1a            | COL2A1   | -3.02 | -0.64 |
| BI882313 | Collagen type II, alpha-1b                                                                                                                                                   | col2a1b            | COL2A1   | -2.02 | -1.65 |
| AI601793 | Collagen, type IV, alpha 5 (Alport syndrome)                                                                                                                                 | col4a5             | COL4A5   | -2.40 | -2.17 |
| AL730406 | Collagen, type IV, alpha 6                                                                                                                                                   | col4a6             | COL4A6   | 2.67  | -2.61 |
| AW510261 | LOC799369 sim to collagen, type V, alpha 1                                                                                                                                   | col5a1             | COL5A1   | -2.24 | -0.61 |
| BE558113 | Collagen, type VI, alpha 1                                                                                                                                                   | col6a1             | COL6A1   | -3.08 | -2.01 |
| BM184154 | COMM domain containing 7                                                                                                                                                     | zgc:101056         | COMM7    | 1.62  | 0.42  |
| AB040045 | Zeta2-cop                                                                                                                                                                    | copz2              | COPZ2    | 0.57  | 3.15  |
| BI885882 | 3' end of coronin, actin binding protein, 1C                                                                                                                                 | BI885882           | CORO1C   | 2.89  | 1.14  |
| AW175342 | Coronin, actin binding protein, 1C                                                                                                                                           | coro1c             | CORO1C   | 3.29  | 2.21  |
| BG308803 | LOC558987 sim to COX17 cytochrome c oxidase assembly homolog                                                                                                                 | LOC558987          | COX17    | 2.47  | -1.59 |
| BI672330 | LOC402880 sim to cytochrome c oxidase subunit IV isoform 1                                                                                                                   | LOC402880          | COX4I1   | 0.50  | -2.40 |
| BI879411 | LOC393776 sim to cytochrome c oxidase subunit IV isoform 1                                                                                                                   | zgc:73355          | COX4I1   | 3.02  | 3.45  |
| AF336125 | Ceruloplasmin                                                                                                                                                                | cp                 | CP       | 4.05  | 5.55  |
| BF717433 | Carboxypeptidase A1 (pancreatic)                                                                                                                                             | cpa1               | CPA1     | -3.17 | -3.31 |
| AF376130 | Carboxypeptidase A5                                                                                                                                                          | cpa5               | CPA1     | -1.94 | -3.62 |
| AI667240 | Carboxypeptidase B1 (tissue)                                                                                                                                                 | cpb1               | CPB1     | -3.13 | -2.02 |
| AB011681 | Cytoplasmic polyadenylation element binding protein 1-like                                                                                                                   | zgc:194449         | CPEB1    | 2.30  | 0.92  |
| AF076918 | Orb/CPEB-related RNA-binding protein                                                                                                                                         | zorba              | CPEB1    | -2.44 | -4.58 |
| BG891864 | Carboxypeptidase N, polypeptide 1                                                                                                                                            | cpn1               | CPN1     | -0.98 | 4.04  |
| AW078446 | Copine 1                                                                                                                                                                     | cpne1              | CPNE3    | -3.01 | 2.20  |
| AI793554 | Cellular retinoic acid binding protein 2, a                                                                                                                                  | crabp2a            | CRABP2   | -2.77 | -1.83 |
| BI846526 | LOC449795 sim to Cysteine-rich protein 2                                                                                                                                     | zgc:101840         | CRIP2    | 2.24  | -1.72 |
| BI878977 | LOC100124600 weak sim to CRP   C-reactive protein, pentraxin-related                                                                                                         | zgc:171660         | CRP      | -1.71 | -0.56 |
| AB042249 | Cryptochrome 1b (photolyase-like)                                                                                                                                            | cry1b              | CRY1     | -0.47 | -3.44 |
| AW344177 | Cryptochrome 2b                                                                                                                                                              | cry2b              | CRY1     | 1.20  | -1.90 |
| AB042253 | Cryptochrome 4                                                                                                                                                               | cry4               | CRY1     | -1.45 | -2.09 |
| BI983705 | Cryptochrome 5                                                                                                                                                               | cry5               | CRY2     | -2.90 | -1.59 |
| AW116808 | Cryptochrome DASH weak sim to cryptochrome 2 (photolyase-like)                                                                                                               | cry-dash           | CRY2     | -0.71 | -1.85 |
| BC076518 | Crystallin, alpha B, b                                                                                                                                                       | cryabb             | CRYAB    | -2.37 | -1.15 |
| BC090697 | Crystallin, zeta (quinone reductase)                                                                                                                                         | cryz               | CRYZ     | 2.09  | 1.86  |
| AI588190 | Intergenic 3' to esad   cysteine sulfonic acid decarboxylase and 5' to zgc:153696 sim to ZNF740   zinc finger protein 740                                                    | wu:fb97d04         | CSAD     | 3.49  | 2.33  |
| AW343922 | Chromosome segregation 1-like (S. cerevisiae)                                                                                                                                | ese1               | CSE1L    | -0.77 | -2.19 |
| AW171190 | Casein kinase 2 alpha 1                                                                                                                                                      | ck2a1              | CSNK2A1  | 0.80  | 4.35  |
| AW116161 | Casein kinase 2 alpha 2a                                                                                                                                                     | ck2a2a             | CSNK2A2  | 1.52  | 0.96  |
| S76877   | Casein kinase 2 beta                                                                                                                                                         | ck2b               | CSNK2B   | -0.54 | 2.32  |
| BI880158 | 3' end of esrnp1b   cysteine-serine-rich nuclear protein 1b and 3' to LOC556735   similar to solute carrier organic anion transporter family, member 5A1                     | wu:fb6a01          | CSRNP3   | -0.70 | 1.83  |
| CF595092 | Cysteine and glycine-rich protein 2 binding protein                                                                                                                          | estr2bp            | CSR2BP   | 1.10  | 2.29  |
| BI846236 | C-terminal binding protein 1                                                                                                                                                 | ctbp1              | CTBP1    | 2.58  | 1.19  |
| BC095870 | LOC553744 sim to CTD (carboxy-terminal domain, RNA polymerase II, polypeptide A) small phosphatase 1                                                                         | zgc:113169         | CTDSP1   | 1.71  | 1.10  |
| BE693178 | Connective tissue growth factor                                                                                                                                              | ctgf               | CTGF     | -0.28 | 3.51  |
| U41081   | Catenin (cadherin-associated protein), beta 1                                                                                                                                | ctnnb1             | CTNNB1   | -1.20 | 1.90  |
| BI891235 | Catenin, beta 2                                                                                                                                                              | ctnnb2             | CTNNB1   | 1.04  | 4.46  |
| AB046866 | Beta-catenin-interacting protein                                                                                                                                             | icat               | CTNNBIP1 | 1.12  | -2.43 |
| BI889539 | Sim to catenin (cadherin-associated protein), delta 1                                                                                                                        | LOC556726          | CTNND1   | 1.82  | 0.14  |
| AW019526 | LOC550419 sim to chymotrypsinogen B1                                                                                                                                         | zgc:112160         | CTRB1    | -4.72 | -4.11 |
| BM101561 | Chymotrypsinogen B1                                                                                                                                                          | ctrb1              | CTRB2    | -0.60 | -3.53 |
| BI476180 | LOC793503 sim to chymotrypsin-like                                                                                                                                           | LOC793503          | CTRL     | -3.35 | -1.77 |
| AJ278269 | Nothepsin (sim to cathepsin E)                                                                                                                                               | nots               | CTSE     | -4.16 | -0.21 |
| AI384696 | Cathepsin K                                                                                                                                                                  | ctsk               | CTSK     | -1.99 | 2.62  |
| BI704278 | Cathepsin L, a                                                                                                                                                               | ctsla              | CTSL1    | 1.90  | 2.31  |
| BC075887 | Cathepsin L, l                                                                                                                                                               | ctsl.l             | CTSL2    | -1.95 | -6.31 |
| Y08321   | Cathepsin L, 1 b                                                                                                                                                             | ctsl1b             | CTSL2    | -0.27 | -1.69 |
| BI672022 | LOC641325 weak sim to cathepsin W                                                                                                                                            | zgc:123103         | CTSW     | 3.74  | 3.73  |
| BC055600 | Cortactin                                                                                                                                                                    | cttn               | CTTN     | 0.47  | 2.61  |
| BM103906 | CTE domain containing 2                                                                                                                                                      | ctned2             | CTUDC2   | 0.38  | -3.33 |
| AB032726 | CUG triplet repeat, RNA-binding protein 1                                                                                                                                    | cugbp1             | CUGBP1   | -2.09 | -0.26 |
| AF321194 | CUG triplet repeat, RNA binding protein 2                                                                                                                                    | cugbp2             | CUGBP2   | -1.45 | 2.88  |
| BI888458 | Cullin 3                                                                                                                                                                     | cull3              | CUL3     | 0.51  | -3.93 |

|          |                                                                                                                                                                        |            |          |       |       |
|----------|------------------------------------------------------------------------------------------------------------------------------------------------------------------------|------------|----------|-------|-------|
| BI886394 | Cullin 5                                                                                                                                                               | cul5       | CUL5     | 2.29  | -0.46 |
| BI878753 | LOC556215 weak sim to CUB and zona pellucida-like domains 1                                                                                                            | wu:fb66a12 | CUZD1    | -1.79 | -4.22 |
| AF268197 | Coxsackie virus and adenovirus receptor                                                                                                                                | cxadr      | CXADR    | 3.49  | 1.90  |
| BG729476 | 3' end of cxcl12a   chemokine (C-X-C motif) ligand 12a (stromal cell-derived factor 1) and 5' to LOC560477                                                             | BG729476   | CXCL12   | -1.02 | 3.47  |
| AI641124 | Chemokine (C-X-C motif) ligand 12b (stromal cell-derived factor 1)                                                                                                     | cxcl12b    | CXCL12   | -1.66 | 1.44  |
| AY057095 | Chemokine (C-X-C motif) receptor 4a                                                                                                                                    | cxcr4a     | CXCR4    | -0.66 | 3.32  |
| AW019729 | Intergenic 3' to cyb5b   cytochrome b5 type B and 5' to dhx38   DEAH (Asp-Glu-Ala-His) box polypeptide 38                                                              | wu:fd56d05 | CYB5A    | 1.87  | 1.50  |
| AW115575 | Cytochrome P450, subfamily XIA, polypeptide 1                                                                                                                          | cyp11a1    | CYP11A1  | 1.40  | -5.43 |
| AY281362 | Cytochrome P450, family 17, subfamily A, polypeptide 1                                                                                                                 | cyp17a1    | CYP17A1  | 0.52  | -3.11 |
| BM185037 | LOC406641 sim to cytochrome P450, family 20, subfamily A, polypeptide 1                                                                                                | zgc:63986  | CYP20A1  | 1.24  | 1.84  |
| U68234   | Cytochrome P450, subfamily XXVIA, polypeptide 1                                                                                                                        | cyp26a1    | CYP26A1  | 0.30  | -3.99 |
| AI497370 | Weak sim to cytochrome P450, family 2, subfamily C, polypeptide 8                                                                                                      | zgc:136371 | CYP2C8   | 3.24  | 1.72  |
| AF248042 | Cytochrome P450, family 2, subfamily J, polypeptide 28                                                                                                                 | cyp2j28    | CYP2J2   | 1.60  | -2.14 |
| AF221128 | NP_001036243 sim to cytochrome P450, family 2, subfamily J, polypeptide 2                                                                                              | zgc:162815 | CYP2J2   | -2.61 | -2.13 |
| BC071533 | LOC415182 sim to cytochrome P450, family 2, subfamily J, polypeptide 2                                                                                                 | zgc:86915  | CYP2J2   | 2.31  | -3.84 |
| BG884091 | Intron of LOC563369 sim to CYP2R1   cytochrome P450, family 2, subfamily R, polypeptide 1                                                                              | BG884091   | CYP2R1   | 1.86  | -0.23 |
| BM181524 | LOC402847 sim to cytochrome P450, family 2, subfamily U, polypeptide 1                                                                                                 | LOC402847  | CYP2U1   | 3.19  | 0.31  |
| BC085438 | Cytochrome P450, family 3, subfamily c, polypeptide 1 like, 2                                                                                                          | cyp3c1l2   | CYP3A4   | -2.12 | -4.14 |
| BC095036 | Cytochrome P450, family 46, subfamily A, polypeptide 1                                                                                                                 | cyp46a1    | CYP46A1  | -1.72 | -3.88 |
| BM185006 | Sim to cytochrome P450, family 4, subfamily B, polypeptide 1                                                                                                           | BM185006   | CYP4B1   | -4.46 | -4.57 |
| AW019701 | LOC562008 sim to cytochrome P450, family 4, subfamily V, polypeptide 2                                                                                                 | zgc:154042 | CYP4V2   | 3.84  | 2.85  |
| AW077854 | Disabled homolog 2 (Drosophila)                                                                                                                                        | dab2       | DAB2     | 0.92  | -4.50 |
| AF427108 | Dachshund a                                                                                                                                                            | dacha      | DACH2    | -3.50 | -2.61 |
| AY513131 | Dapper homolog 2, antagonist of beta-catenin (xenopus)                                                                                                                 | dact2      | DACT2    | -1.41 | -2.17 |
| BM183249 | Defender against cell death 1                                                                                                                                          | dad1       | DAD1     | 1.27  | 1.53  |
| AF231127 | Death associated protein 1a                                                                                                                                            | dap1a      | DAP      | -0.28 | -3.38 |
| AF137535 | Death-associated protein 6                                                                                                                                             | daxx       | DAXX     | -2.06 | -0.83 |
| AB018191 | Daz-like gene                                                                                                                                                          | dazl       | DAZL     | -4.42 | -5.03 |
| AI878520 | 3' end of LOC799835; sim to PRR7 protein and 3' end of LOC561153; sim to DBN1: drebrin 1                                                                               | wu:fc60b09 | DBN1     | 1.57  | 1.75  |
| AI544627 | 3' end of LOC100148204 part sim to DBNL   drebrin-like and 3' to si:dkkey-40c1.1.1 sim to RTKN   rhotekin                                                              | wu:fb76h05 | DBNL     | -1.48 | -1.63 |
| AI415831 | LOC431748 sim to drebrin-like                                                                                                                                          | zgc:91835  | DBNL     | -2.10 | -1.48 |
| BQ618302 | 3' end of LOC100151219 part sim to DBR1   debranching enzyme homolog 1 and 3' to LOC572355   sim to CHD9   chromodomain helicase DNA binding protein 9                 | BQ618302   | DBR1     | 3.20  | -0.86 |
| AF030285 | Developing brain homeobox 1b                                                                                                                                           | dbx1b      | DBX1     | 4.94  | 3.08  |
| BI846005 | LOC563259 sim to doublecortin domain containing 2                                                                                                                      | zgc:123267 | DCDC2    | -2.22 | -1.32 |
| AW233222 | Dachsous 1                                                                                                                                                             | dehs1      | DCHS1    | 0.49  | 1.98  |
| AJ344448 | Decapping enzyme                                                                                                                                                       | dep1a      | DCP1A    | -0.61 | -2.40 |
| AF280090 | Dopachrome tautomerase                                                                                                                                                 | det        | DCT      | 2.96  | 0.38  |
| AA494790 | Dicarbonyl-L-xylulose reductase                                                                                                                                        | dexr       | DCXR     | 0.86  | 2.17  |
| AW184045 | Dimethylarginine dimethylaminohydrolase 1                                                                                                                              | zgc:85829  | DDAH1    | -2.14 | -0.83 |
| AW116386 | LOC393599 sim to damage-specific DNA binding protein 1, 127kDa                                                                                                         | zgc:63840  | DDB1     | 2.38  | 0.61  |
| AI815343 | LOC560581 sim to development and differentiation enhancing factor 2                                                                                                    | zgc:158353 | DDEF2    | -1.96 | -1.19 |
| AW344255 | DNA-damage inducible protein 2                                                                                                                                         | ddi2       | DDI2     | 1.73  | -0.48 |
| AW115990 | 3' end of brd8: bromodomain containing 8 and 3' end of im:7137886 sim to DDIT4L: DNA-damage-inducible transcript 4-like                                                | AW115990   | DDIT4L   | -1.12 | 2.60  |
| AW306107 | DEAD/H (Asp-Glu-Ala-Asp/His) box polypeptide 19 (DBP5 homolog, yeast)                                                                                                  | ddx19      | DDX19B   | -1.77 | -2.49 |
| AI397119 | Sim to DEAD (Asp-Glu-Ala-Asp) box polypeptide 20                                                                                                                       | ddx20      | DDX20    | 2.31  | -1.84 |
| BI890491 | DEAD (Asp-Glu-Ala-Asp) box polypeptide 39b                                                                                                                             | ddx39b     | DDX39    | -2.23 | -1.86 |
| BM184007 | DEAD (Asp-Glu-Ala-Asp) box polypeptide 41                                                                                                                              | ddx41      | DDX41    | -2.49 | -2.46 |
| BG727249 | DEAD (Asp-Glu-Ala-Asp) box polypeptide 5                                                                                                                               | ddx5       | DDX5     | -0.34 | 2.50  |
| AI964375 | DEAD (Asp-Glu-Ala-Asp) box polypeptide 56                                                                                                                              | ddx56      | DDX56    | 3.12  | 0.37  |
| AW422167 | Degenerative spermatocyte homolog 2, lipid desaturase                                                                                                                  | degs2      | DEGS2    | -0.04 | -3.03 |
| AI667236 | DEP domain containing 6                                                                                                                                                | depd6      | DEPDC6   | 2.66  | 2.03  |
| BC083220 | 2-deoxyribose-5-phosphate aldolase homolog (C. elegans)                                                                                                                | dera       | DERA     | 2.55  | 0.53  |
| BM184284 | Der1-like domain family, member 1                                                                                                                                      | der1l      | DERL1    | 2.27  | 1.83  |
| AI601451 | Intron of zgc:154009: desmin                                                                                                                                           | AI601451   | DES      | 1.31  | -1.94 |
| BC067602 | DNA fragmentation factor, beta polypeptide (caspase-activated DNase)                                                                                                   | dfib       | DFFB     | 0.40  | -2.49 |
| AI957604 | 3' end of dfna5: deafness, autosomal dominant 5                                                                                                                        | AI957604   | DFNA5    | 0.92  | 3.08  |
| BC055631 | 7-dehydrocholesterol reductase                                                                                                                                         | dher7      | DHCR7    | 0.21  | 6.20  |
| BI708067 | Dihydrodiol dehydrogenase (dimeric), like                                                                                                                              | dhdhl      | DHHD     | 2.21  | 3.17  |
| AY026507 | Dihydrofolate reductase                                                                                                                                                | dhfr       | DHFR     | -0.68 | -3.24 |
| AI721540 | Dihydroorotate dehydrogenase                                                                                                                                           | dhodh      | DHODH    | 2.40  | 2.38  |
| BI983608 | LOC556393 sim to dehydrogenase/reductase (SDR family) member 12                                                                                                        | zgc:153679 | DHRS12   | -2.91 | -1.66 |
| AW134000 | Sim to diaphanous homolog 1                                                                                                                                            | wu:fi40a06 | DIAPH1   | -7.31 | -6.38 |
| BM104245 | 3' end of dixd1b: DIX domain containing 1b and 5' to ddx10: DEAD (Asp-Glu-Ala-Asp) box polypeptide 10                                                                  | BM104245   | DIXDC1   | -1.53 | -1.03 |
| BE605392 | 3' end of LOC566257 sim to DLC1   deleted in liver cancer 1 and 3' to rars arginyl-tRNA synthetase                                                                     | BE605392   | DLC1     | 1.41  | -1.50 |
| BM184863 | Dises, large (Drosophila) homolog 1                                                                                                                                    | dlig1      | DLG1     | -2.22 | 2.57  |
| BG883810 | Intron of MGC162970   similar to SAP102                                                                                                                                | BG883810   | DLG3     | 4.18  | -0.96 |
| AI957667 | Dises, large (Drosophila) homolog-associated protein 5                                                                                                                 | dligap5    | DLGAP5   | 0.37  | -1.58 |
| AF146429 | DeltaC                                                                                                                                                                 | dlic       | DLL1     | 0.60  | 2.36  |
| U67842   | Distal-less homeobox gene 1a                                                                                                                                           | dix1a      | DLX1     | 0.67  | 2.21  |
| U67843   | Distal-less homeobox gene 2b                                                                                                                                           | dix2b      | DLX2     | -2.82 | -2.67 |
| X65060   | Dlx-3 (distal-less related homeobox-containing) gene                                                                                                                   | dix3b      | DLX3     | 2.64  | 3.83  |
| U03876   | Distal-less homeobox gene 5a                                                                                                                                           | dix5a      | DLX5     | 2.15  | -0.20 |
| AI722479 | 3' end of last intron of LOC796779   similar to deleted in malignant brain tumors 1 and 5' to si:dkkey-14d8.21 weak sim to DMBT1   deleted in malignant brain tumors 1 | AI722479   | DMBT1    | -2.16 | -1.74 |
| BC083273 | LOC450035 sim to doublesex and mab-3 related transcription factor 3                                                                                                    | zgc:101766 | DMRT3    | 1.78  | -0.59 |
| BI891737 | LOC560838: DnaJ (Hsp40) homolog, subfamily A member                                                                                                                    | dnaia      | DNAIA1   | -0.42 | 3.34  |
| AI497286 | DnaJ (Hsp40) homolog, subfamily C, member 3                                                                                                                            | dnaic3     | DNAJC3   | -0.66 | 3.20  |
| BC076354 | DnaJ (Hsp40) homolog, subfamily C, member 5                                                                                                                            | dnaic5     | DNAJC5   | -2.08 | -2.54 |
| BI865944 | DnaJ (Hsp40) homolog, subfamily C, member 7                                                                                                                            | dnaic7     | DNAJC7   | -1.81 | 0.79  |
| AW019064 | Deoxyribonuclease I-like 3                                                                                                                                             | dnae1l3    | DNASE1L3 | 2.82  | 1.43  |
| BM172694 | LOC393843 sim to DNASE1L3   deoxyribonuclease I-like 3                                                                                                                 | zgc:77816  | DNASE1L3 | -1.90 | -0.90 |
| BC095578 | Dead end                                                                                                                                                               | dnd        | DND1     | -2.26 | -5.17 |
| AI721310 | Dynamin 1-like                                                                                                                                                         | dnm1l      | DNM1L    | -2.19 | 0.35  |
| AB196917 | DNA (cytosine-5-)-methyltransferase 6 (sim to DNA (cytosine-5-)-methyltransferase 3 alpha)                                                                             | dnm16      | DNMT3A   | 1.85  | -0.22 |
| AB196915 | DNA (cytosine-5-)-methyltransferase 4                                                                                                                                  | dnm14      | DNMT3B   | -0.19 | -2.91 |
| BG737918 | DNA (cytosine-5-)-methyltransferase 5 (sim to DNA (cytosine-5-)-methyltransferase 3 beta)                                                                              | dnm15      | DNMT3B   | 0.82  | -3.35 |
| AI931096 | DNA (cytosine-5-)-methyltransferase 7 (sim to DNA (cytosine-5-)-methyltransferase 3 beta)                                                                              | dnm17      | DNMT3B   | -1.02 | -2.57 |
| BI887627 | Deoxynucleotidyltransferase, terminal, interacting protein 2                                                                                                           | dnttip2    | DNTTIP2  | 1.12  | 1.80  |
| AW202714 | LOC393582 sim to dopey family member 2                                                                                                                                 | zgc:63622  | DOPEY2   | 2.13  | 1.18  |
| BI983485 | 3' end of zgc:112231: sim to DPH3: DPH3, KTI11 homolog and 5' to zgc:92024: NCK adaptor protein 2                                                                      | BI983485   | DPH3     | 2.86  | 1.13  |
| CK698755 | Sim to DPH3   DPH3, KTI11 homolog                                                                                                                                      | zgc:112231 | DPH3     | -1.75 | -1.34 |
| BC085447 | DPH5 homolog (S. cerevisiae)                                                                                                                                           | dph5       | DPH5     | 2.51  | 0.61  |
| AW077909 | Dipeptidylpeptidase 3                                                                                                                                                  | dpp3       | DPP3     | -2.33 | -0.31 |
| AW019791 | Dihydropyrimidine dehydrogenase                                                                                                                                        | dpyd       | DPYD     | 5.17  | 3.17  |
| AY333791 | Dopamine receptor D2 like                                                                                                                                              | drd2l      | DRD2     | 3.38  | 0.04  |
| AY750154 | Dopamine receptor D4b                                                                                                                                                  | drd4b      | DRD4     | 2.57  | -1.07 |
| BE017474 | Desmoglein 2                                                                                                                                                           | dsg2       | DSG2     | -3.41 | -0.47 |
| BI876262 | Dentin sialophosphoprotein                                                                                                                                             | BI876262   | DSPP     | -5.69 | -5.67 |
| BI884064 | Dual serine/threonine and tyrosine protein kinase                                                                                                                      | dstk       | DSTYK    | -0.19 | 4.50  |

|          |                                                                                                                            |                   |          |       |       |
|----------|----------------------------------------------------------------------------------------------------------------------------|-------------------|----------|-------|-------|
| BM104281 | Denticleless homolog (Drosophila)                                                                                          | dtl               | DTL      | 1.86  | -2.84 |
| BI888604 | Dual specificity phosphatase 1                                                                                             | duspl             | DUSP1    | 0.73  | 2.33  |
| BC078397 | LOC445057 sim to dual specificity phosphatase 2                                                                            | zgc:91929         | DUSP2    | -0.68 | 1.65  |
| AI601685 | Dual specificity phosphatase 5                                                                                             | dusp5             | DUSP5    | 2.17  | -1.99 |
| BI706908 | Dual specificity phosphatase 6                                                                                             | dusp6             | DUSP6    | 3.53  | -1.47 |
| BE017477 | DUTP pyrophosphatase                                                                                                       | dut               | DUT      | 0.59  | -3.06 |
| BM083964 | Dishevelled, dsh homolog 2 (Drosophila)                                                                                    | dv12              | DVL2     | 0.51  | -2.95 |
| AW344179 | Sim to ELL associated factor 1                                                                                             | AW344179          | EAF1     | 2.16  | -0.23 |
| BI878159 | Epithelial cell transforming sequence 2 oncogene                                                                           | ect2              | ECT2     | 2.41  | 4.72  |
| BG303491 | ER degradation enhancer, mannosidase alpha-like 1                                                                          | edem1             | EDEM1    | -0.99 | 2.25  |
| BI885824 | Sim to endothelial differentiation-related factor 1                                                                        | BI885824          | EDF1     | 3.49  | 1.15  |
| AB057355 | Endothelin receptor type A                                                                                                 | edna              | EDNRA    | 2.23  | 2.36  |
| BC064291 | Elongation factor 1-alpha                                                                                                  | ef1a              | EEF1A1   | -3.31 | 2.56  |
| BC075885 | LOC436644 sim to eukaryotic translation elongation factor 1 alpha 2                                                        | zgc:92085         | EEF1A2   | -1.25 | -1.59 |
| BE557668 | Eukaryotic translation elongation factor 1 beta 2                                                                          | ef1b2             | EEF1B2   | 2.91  | 2.49  |
| CD606031 | Eukaryotic translation elongation factor 2, like                                                                           | ef2l              | EEF2     | 3.17  | -2.37 |
| AW305495 | LOC336168 sim to eukaryotic translation elongation factor 2                                                                | LOC336168         | EEF2     | -3.04 | -1.01 |
| BM036459 | EF-hand domain (C-terminal) containing 1                                                                                   | efhc1             | EFHC1    | -1.91 | 3.56  |
| Y09668   | Ephrin A2                                                                                                                  | efna2             | EFNA2    | -2.17 | -1.24 |
| AF375224 | Ephrin B1                                                                                                                  | efnb1             | EFNB1    | 0.42  | 2.16  |
| AF375226 | Ephrin B2b                                                                                                                 | efnb2b            | EFNB2    | 2.15  | 1.80  |
| AY332224 | Epidermal growth factor precursor                                                                                          | egf               | EGF      | -0.19 | -2.06 |
| BC076013 | EGF-like-domain, multiple 6                                                                                                | egfl6             | EGFL6    | -1.40 | -3.16 |
| BG305741 | 3' end of egr1   early growth response 1                                                                                   | BG305741          | EGR1     | 3.18  | 5.26  |
| AY070229 | Early growth response 2a                                                                                                   | egr2a             | EGR2     | 1.72  | 3.46  |
| X70322   | Early growth response 2b                                                                                                   | egr2b             | EGR2     | -1.81 | -2.01 |
| AI584583 | EH-domain containing 3, like                                                                                               | ehd3l             | EHD1     | -2.01 | -1.56 |
| AF257517 | Eukaryotic translation initiation factor 2, subunit 1 alpha                                                                | ei2f1             | EIF2S1   | -0.46 | 2.90  |
| AI964258 | Eukaryotic translation initiation factor 3, subunit C                                                                      | ei3c              | EIF3C    | 0.26  | 3.13  |
| BG304333 | Eukaryotic translation initiation factor 3, subunit 6                                                                      | ei3ea             | EIF3E    | -0.42 | 2.26  |
| AW232975 | Sim to eukaryotic translation initiation factor 3, subunit F                                                               | LOC557270         | EIF3F    | 1.02  | 1.65  |
| AI477041 | Eukaryotic translation initiation factor 3, subunit 6 interacting protein                                                  | ei3f6ip           | EIF3L    | 0.45  | 2.43  |
| BI876856 | Eukaryotic translation initiation factor 4A, isoform 1B                                                                    | ei4a1b            | EIF4A1   | -0.90 | 2.37  |
| AW466697 | Eukaryotic translation initiation factor 4A, isoform 2                                                                     | ei4a2             | EIF4A2   | 0.41  | 1.77  |
| AF176316 | Eukaryotic translation initiation factor 4e 1b                                                                             | ei4e1b            | EIF4E    | -0.30 | -4.10 |
| BM154327 | LOC492482 sim to eukaryotic translation initiation factor 4E binding                                                       | zgc:103720        | EIF4EBP3 | -4.61 | -1.35 |
| BM185252 | Sim to eukaryotic translation initiation factor 4 gamma, 3                                                                 | LOC568761         | EIF4G3   | -1.56 | -0.72 |
| U84615   | ETS-related factor1                                                                                                        | etf1              | ELF1     | -3.27 | -0.23 |
| AI666886 | ELMO/CED-12 domain containing 2                                                                                            | elmod2            | ELMOD2   | 1.70  | 1.32  |
| BI866359 | Intron of elov1b   elongation of very long chain fatty acids (FEN1/Elo2, SUR4/Elo3, yeast)-like 1b                         | BI866359          | ELOVL1   | 5.05  | 0.81  |
| BG303052 | ELOVL family member 5, elongation of long chain fatty acids (yeast)                                                        | elov15            | ELOVL5   | 3.48  | 3.12  |
| BI876830 | ELOVL family member 7, elongation of long chain fatty acids (yeast) b                                                      | elov17b           | ELOVL7   | -1.93 | -2.50 |
| BI877696 | Elongation of very long chain fatty acids-like                                                                             | zgc:55879         | ELOVL7   | -2.70 | -1.92 |
| BE605325 | Sim to epithelial membrane protein 2                                                                                       | BE605325          | EMP2     | -1.73 | -2.32 |
| BI845475 | 3' end of enah: enabled homolog and 5' end to lbr: lamin B receptor                                                        | BI845475          | ENAH     | -3.45 | -2.55 |
| BC090907 | Enabled homolog (Drosophila)                                                                                               | enah              | ENAH     | -1.14 | -1.54 |
| BI704313 | Ectodermal-neural cortex (with BTB-like domain)                                                                            | enc1              | ENC1     | 2.71  | 1.84  |
| AI959507 | Sim to ectonucleotide pyrophosphatase/phosphodiesterase 2                                                                  | AI959507          | ENPP2    | 2.96  | 2.95  |
| AI721596 | Weak sim to ectonucleotide pyrophosphatase/phosphodiesterase 3                                                             | AI721596          | ENPP3    | -1.63 | -2.66 |
| BC078419 | Ectonucleoside triphosphate diphosphohydrolase 2 a.1                                                                       | entpd2a.1         | ENTPD2   | -2.62 | -2.42 |
| AF329830 | Eomesodermin homolog a                                                                                                     | eomesa            | EOMES    | -1.19 | -3.19 |
| BI979933 | Enhancer of polycomb homolog 2 (Drosophila)                                                                                | epc2              | EPC2     | 0.29  | -2.11 |
| AW077546 | Ependymin                                                                                                                  | epd               | EPDR1    | -6.43 | -3.81 |
| BI840968 | Intron of LOC100006306 sim to EPHA3   EPH receptor A3                                                                      | BI840968          | EPHA3    | 1.79  | -0.83 |
| BC078252 | Eph-like kinase 1                                                                                                          | ek1               | EPHA4    | 1.76  | -3.08 |
| AW154716 | Eph receptor A4a                                                                                                           | epha4a            | EPHA4    | 0.38  | -3.23 |
| AF369381 | Epha4b                                                                                                                     | epha4b            | EPHA4    | 0.68  | 1.50  |
| AW466558 | Epoxide hydrolase 1, microsomal (xenobiotic)                                                                               | ephx1             | EPHX1    | 5.39  | -0.93 |
| AF349034 | Myeloid-specific peroxidase                                                                                                | mpx               | EPX      | 0.24  | 1.58  |
| BC086811 | V-ets erythroblastosis virus E26 oncogene like (avian)                                                                     | erg               | ERG      | -1.10 | -1.74 |
| AW116232 | ERGIC and golgi 3                                                                                                          | ergic3            | ERGIC3   | -1.80 | 3.27  |
| AI878797 | 3' end of erlin1   ER lipid raft associated 1 and 3' to zgc:66426 calponin-homology and microtubule-associated protein     | AI878797          | ERLIN1   | 1.07  | 1.85  |
| BC053166 | ERO1-like                                                                                                                  | ero1l             | ERO1LB   | -1.84 | -2.39 |
| BG883231 | LOC767700 sim to ERO1-like beta (S. cerevisiae)                                                                            | zgc:153032        | ERO1LB   | 2.14  | 2.17  |
| BI890679 | Thioredoxin domain containing 4 (endoplasmic reticulum)                                                                    | txndc4            | ERP44    | 2.05  | 2.11  |
| AW128527 | LOC798009 sim to ERBB receptor feedback inhibitor 1 (mitogen-inducible gene 6 protein)                                     | zgc:162129        | ERRF1    | 2.77  | 3.23  |
| AF349414 | Estrogen receptor 2a                                                                                                       | estr2a            | ESR2     | 2.37  | 0.41  |
| BG303774 | Epithelial splicing regulatory protein 2                                                                                   | esrp2             | ESRP1    | -2.75 | 2.09  |
| AW018801 | LOC541449 sim to ethanolanine kinase 1                                                                                     | zgc:113516        | ETNK1    | 1.61  | 3.09  |
| BG985478 | V-ets erythroblastosis virus E26 oncogene homolog 1a                                                                       | ets1a             | ETS1     | -1.51 | 3.28  |
| AI816689 | Ets variant gene 5 (ets-related molecule)                                                                                  | etv5              | ETV5     | -2.07 | -1.82 |
| AI957816 | LOC793139 envoplakin                                                                                                       | evpl              | EVPL     | -3.77 | -2.46 |
| AI626478 | Envoplakin                                                                                                                 | si:ch211-157f15.1 | EVPL     | -2.60 | -1.80 |
| AI477647 | Exocyst complex component 1                                                                                                | exoc1             | EXOC1    | 1.17  | -2.46 |
| BI878954 | Exostoses (multiple) 1a                                                                                                    | ext1a             | EXT1     | -1.73 | -0.29 |
| AY734456 | Exostoses (multiple) 1b                                                                                                    | ext1b             | EXT1     | 2.00  | 2.46  |
| BC081636 | Eyes absent 2                                                                                                              | zgc:92279         | EYA2     | -1.68 | -2.00 |
| BI476229 | Ezrin                                                                                                                      | ezr               | EZR      | -1.26 | -1.62 |
| BC097035 | Coagulation factor X; LOC100150577                                                                                         | f10               | F10      | 2.18  | -3.86 |
| AW115527 | 3' end of f2   coagulation factor II (thrombin) and 5' to arhgap1   Rho GTPase activating protein 1                        | AW115527          | F2       | 2.63  | -4.11 |
| AY040345 | Coagulation factor VII                                                                                                     | f7                | F7       | 2.84  | -4.11 |
| AI722559 | Coagulation factor VIII                                                                                                    | f7i               | F7       | 2.17  | -3.66 |
| BI843279 | Coagulation factor IX                                                                                                      | f9                | F9       | 2.60  | -3.87 |
| BC076113 | Fatty acid amide hydrolase 2a                                                                                              | faah2a            | FAAH2    | 3.41  | 3.20  |
| BI983434 | Fatty acid amide hydrolase 2b                                                                                              | faah2b            | FAAH2    | -0.83 | -1.55 |
| BM185013 | 3' end of fabp2: fatty acid binding protein 2, intestinal and 3' to LOC558085 sim to USP5: ubiquitin specific peptidase 53 | BM185013          | FABP2    | 2.98  | 2.10  |
| AF448057 | Fatty acid binding protein 3, muscle and heart                                                                             | fabp3             | FABP3    | 2.03  | 3.40  |
| CO931612 | Fatty acid binding protein 6, ileal (gastrotropin)                                                                         | fabp6             | FABP6    | -3.91 | -4.29 |
| AF309556 | Fatty acid desaturase 2                                                                                                    | fads2             | FADS2    | -3.42 | 5.07  |
| BC095057 | Fumarylacetoacetate hydrolase domain containing 1                                                                          | fahd1             | FAHD1    | 1.88  | 3.15  |
| BM182806 | Family with sequence similarity 125, member B                                                                              | fam125bb          | FAM125B  | 2.62  | 1.33  |
| AY301038 | Fanconi anemia, complementation group D2                                                                                   | fancd2            | FANCD2   | 1.89  | -1.44 |
| BM096047 | Fanconi anemia, complementation group L                                                                                    | fanc1             | FANCL    | -2.12 | 0.16  |
| BG883685 | FERM, RhoGEF and pleckstrin domain protein 2                                                                               | farp2             | FARP2    | -2.25 | -0.52 |
| AW058816 | Phenylalanine-tRNA synthetase-like, alpha subunit                                                                          | farsla            | FARSA    | 3.04  | 0.61  |
| AF469608 | FAT tumor suppressor homolog 1                                                                                             | fat1              | FAT1     | -1.56 | -2.96 |
| BC083431 | Fibulin 5                                                                                                                  | fibln5            | FBLN5    | 1.35  | 2.05  |
| AA494925 | Fructose-1,6-bisphosphatase 1b                                                                                             | fbp1              | FBP1     | 2.14  | 1.10  |
| CK705086 | Sim to FBXO11   F-box protein 11                                                                                           | CK705086          | FBXO11   | 2.22  | 3.12  |
| BG303968 | F-box protein 32                                                                                                           | fbxo32            | FBXO32   | -0.60 | -3.78 |
| AW115660 | LOC393403 weak sim to F-box protein 43                                                                                     | zgc:66488         | FBXO43   | -2.11 | -2.91 |
| BI885932 | F-box protein 5                                                                                                            | fbxo5             | FBXO5    | -1.38 | -4.49 |
| AY960873 | F-box and WD-40 domain protein FBXW14                                                                                      | fbxw14            | FBXW12   | -0.50 | -2.08 |
| BC057409 | F-box and WD-40 domain protein 5                                                                                           | fbxw5             | FBXW5    | -2.68 | -2.77 |
| AI957820 | Flap structure-specific endonuclease 1                                                                                     | fen1              | FEN1     | -2.44 | -2.21 |
| AI883857 | Fibrinogen alpha chain                                                                                                     | fga               | FGA      | 1.77  | 3.91  |
| BI878927 | Fibrinogen, B beta polypeptide                                                                                             | fgb               | FGB      | 2.64  | 4.10  |

|           |                                                                                                                                                                                              |                   |          |       |       |
|-----------|----------------------------------------------------------------------------------------------------------------------------------------------------------------------------------------------|-------------------|----------|-------|-------|
| AF017370  | Faciogenital dysplasia                                                                                                                                                                       | fgd               | FGD1     | 2.92  | -0.37 |
| AF544025  | Fibroblast growth factor 10 a                                                                                                                                                                | fgf10a            | FGF10    | 0.57  | 2.03  |
| AB195468  | Fibroblast growth factor 18b                                                                                                                                                                 | fgf18b            | FGF18    | -0.73 | 1.66  |
| AY753222  | Fibroblast growth factor 23                                                                                                                                                                  | fgf23             | FGF23    | -0.13 | 2.03  |
| AF283555  | Fibroblast growth factor 4                                                                                                                                                                   | fgf4              | FGF4     | 0.82  | 1.69  |
| AB194699  | Fibroblast growth factor 5                                                                                                                                                                   | fgf5              | FGF5     | -0.30 | 4.59  |
| AB194700  | Fibroblast growth factor 6b                                                                                                                                                                  | fgf6b             | FGF6     | -1.28 | 1.73  |
| AF030560  | Fibroblast growth factor 8a                                                                                                                                                                  | fgf8a             | FGF8     | 0.21  | 3.19  |
| AB100171  | Fibroblast growth factor 8 b                                                                                                                                                                 | fgf8b             | FGF8     | -0.42 | 2.26  |
| AF389400  | Fibroblast growth factor receptor 1                                                                                                                                                          | fgfr1a            | FGFR1    | 0.13  | 2.30  |
| AW232332  | FGFR1 oncogene partner 2                                                                                                                                                                     | fgfr1op2          | FGFR1OP2 | -1.71 | 0.75  |
| AB084105  | Fibroblast growth factor receptor 2                                                                                                                                                          | fgfr2             | FGFR2    | 0.25  | 1.68  |
| U23839    | Fibroblast growth factor receptor 4                                                                                                                                                          | fgfr4             | FGFR4    | 3.08  | 5.06  |
| BI878442  | Fibrinogen gamma chain                                                                                                                                                                       | fgg               | FGG      | 1.79  | 4.45  |
| BI983495  | Fragile histidine triad gene                                                                                                                                                                 | fhit              | FHIT     | -1.73 | 2.98  |
| BI427744  | FK506 binding protein 11                                                                                                                                                                     | fkbp11            | FKBP11   | 2.82  | 0.73  |
| BI979906  | LOC447939 sim to FK506-binding protein 2                                                                                                                                                     | zgc:101826        | FKBP2    | 1.67  | 1.75  |
| BI896312  | Friend leukemia integration 1                                                                                                                                                                | fl1a              | FLI1     | -2.40 | 2.01  |
| AY839950  | Friend leukemia integration 1b                                                                                                                                                               | fl1b              | FLI1     | -0.54 | 2.59  |
| AW777936  | Flightless 1 homolog                                                                                                                                                                         | flii              | FLII     | -3.79 | -2.70 |
| AA658587  | Filamin B, beta (actin binding protein 278)                                                                                                                                                  | flnbl             | FLNB     | -0.66 | -2.10 |
| AI588460  | Filamin C, gamma b (actin binding protein 280)                                                                                                                                               | flncb             | FLNC     | 0.46  | 2.50  |
| BI885492  | Flotillin 1b                                                                                                                                                                                 | flot1b            | FLOT1    | -1.90 | -3.12 |
| AW128244  | Flotillin 2a                                                                                                                                                                                 | flot2a            | FLOT2    | 1.50  | 2.95  |
| AW076633  | Intergenic 3' to flt1   fms-related tyrosine kinase 1 (vascular endothelial growth factor/vascular permeability factor receptor) and 5' to LOC566708   similar to FMS-like tyrosine kinase 3 | AW076633          | FLT1     | -1.35 | -1.84 |
| AF180354  | Kinase insert domain receptor like (sim to fms-related tyrosine kinase 1 (vascular endothelial growth factor/vascular permeability factor receptor)                                          | kdrl              | FLT1     | 0.84  | 2.61  |
| AI601469  | Sim to feline leukemia virus subgroup C cellular receptor family, member 2                                                                                                                   | si:ch211-119b12.6 | FLVCR2   | 0.95  | 1.86  |
| BC096939  | LOC449691 sim to fibromodulin                                                                                                                                                                | zgc:113456        | FMOD     | 2.09  | -0.88 |
| BG302581  | Fibronectin 1b                                                                                                                                                                               | fn1b              | FN1      | 2.44  | -5.10 |
| AF052250  | Forkhead box A1                                                                                                                                                                              | foxa1             | FOXA1    | 2.40  | 4.21  |
| AF052247  | Forkhead box A2                                                                                                                                                                              | foxa2             | FOXA2    | -1.15 | -4.25 |
| 222762    | Forkhead box A3                                                                                                                                                                              | foxa3             | FOXA2    | 3.82  | 2.78  |
| AF052245  | Forkhead box C1b                                                                                                                                                                             | foxc1b            | FOXC1    | -0.26 | 3.82  |
| NM_131729 | Forkhead box D5                                                                                                                                                                              | foxd5             | FOXC1    | -2.51 | 0.25  |
| AF052251  | LOC405850 sim to Forkhead box G1                                                                                                                                                             | foxd5             | FOXD4    | 4.36  | -2.01 |
| BF937564  | Forkhead box H1                                                                                                                                                                              | zgc:85969         | FOXG1    | 2.00  | -0.51 |
| AF263000  | Forkhead box K2                                                                                                                                                                              | foxh1             | FOXH1    | 1.73  | -2.85 |
| AW076653  | Forkhead box Q1                                                                                                                                                                              | foxk2             | FOXK2    | -2.16 | -3.19 |
| AW566603  | Folypolyglutamate synthase                                                                                                                                                                   | foxq1             | FOXQ1    | -3.35 | -1.47 |
| BC058343  | Sim to FRAS1 related extracellular matrix protein 2                                                                                                                                          | fpgs              | FPGS     | 2.51  | 2.05  |
| AI958047  | LOC557352 sim to follistatin-like 3 (secreted glycoprotein)                                                                                                                                  | wu:fc90b05        | FREM2    | 1.67  | 1.90  |
| BC097220  | 3' end of zgc:92245 :LOC792323 sim to ferritin, heavy polypeptide 1                                                                                                                          | zgc:114170        | FSTL3    | -1.72 | -2.45 |
| BI672329  | LOC447823 sim to ferritin, heavy polypeptide 1                                                                                                                                               | BI672329          | FTH1     | 2.34  | 1.32  |
| BC081630  | LOC445165 sim to fucosidase, alpha-L- 1, tissue                                                                                                                                              | zgc:92245         | FTH1     | -3.14 | 1.59  |
| BC078236  | LOC394058; fusion (involved in t(12;16) in malignant liposarcoma)                                                                                                                            | zgc:101116        | FUCA1    | -3.83 | 1.24  |
| AW115841  | LOC550469 sim to fucosyltransferase 9 (alpha (1,3) fucosyltransferase)                                                                                                                       | fus               | FUS      | 1.82  | 0.80  |
| BC093307  | LOC664694 sim to fucosyltransferase 9 (alpha (1,3) fucosyltransferase)                                                                                                                       | zgc:112433        | FUT9     | -4.13 | -2.88 |
| BE605503  | FXYD domain containing ion transport regulator 1 (phospholemman)                                                                                                                             | zgc:136963        | FUT9     | -3.55 | -1.63 |
| AW455046  | New protein weak sim to FYB: FYN binding protein (FYB-120/130)                                                                                                                               | LOC798940         | FXYD1    | 2.90  | 3.93  |
| BG307572  | 3' end of LOC796938 sim to FYB   FYN binding protein (FYB-120/130) and 3' to LOC797005   similar to malignant fibrous histiocytoma amplified sequence 1                                      | BG307572          | FYB      | 1.06  | -1.59 |
| CD604980  | FYN oncogene related to SRC, FGR, YES a                                                                                                                                                      | CD604980          | FYB      | 1.84  | -1.83 |
| AF269145  | Frizzled homolog 10                                                                                                                                                                          | fyna              | FYN      | 1.56  | 2.40  |
| AF039411  | Frizzled homolog 8b                                                                                                                                                                          | fzd10             | FZD10    | -1.10 | -3.34 |
| AF039410  | Frizzled homolog 7a                                                                                                                                                                          | fzd8b             | FZD5     | 0.58  | -3.66 |
| AF336123  | Frizzled homolog 7b                                                                                                                                                                          | fzd7a             | FZD7     | 1.03  | -2.73 |
| BC049397  | Frizzled homolog 8a                                                                                                                                                                          | fzd7b             | FZD7     | -1.23 | -2.65 |
| U49409    | LOC100136843 no homology overlap with zgc:112970: LOC541543 weak sim to G2E3: G2-M-phase specific E3 ubiquitin ligase (partially)                                                            | fzd8a             | FZD8     | 3.04  | 1.36  |
| CB361052  | GA-binding protein transcription factor, alpha subunit                                                                                                                                       | zgc:174680        | G2E3     | -1.10 | -1.57 |
| AF257741  | 3' end of DKEYP-87A12.2 sim GABRD   gamma-aminobutyric acid (GABA) A receptor, delta and 5' to sult1s14   sulfotransferase family 1, cytosolic sulfotransferase 4                            | gabpa             | GABPA    | -2.18 | 1.38  |
| BI671266  | Glutamate decarboxylase 1                                                                                                                                                                    | BI671266          | GABRD    | 1.90  | -1.01 |
| BE015653  | Growth arrest and DNA-damage-inducible, alpha                                                                                                                                                | gad1              | GAD1     | -1.31 | 3.50  |
| BI672019  | Growth arrest and DNA-damage-inducible, beta                                                                                                                                                 | gadd45a           | GADD45A  | 3.89  | 0.64  |
| BF1717630 | Growth arrest and DNA-damage-inducible, gamma                                                                                                                                                | gadd45b           | GADD45B  | -0.90 | 3.13  |
| BG306112  | Intron of LOC559073 sim to UDP-GalNAc:polypeptide, N-acetylgalactosaminyltransferase                                                                                                         | gadd45g           | GADD45G  | -1.30 | 2.04  |
| BI880272  | 3' end of si:dkcy-162b3.1 sim to UDP-N-acetyl-alpha-D-galactosamine:polypeptide N-acetylgalactosaminyltransferase 2 (GalNAc-T2)                                                              | BI880272          | GALNT1   | -1.74 | -0.96 |
| CK707391  | WD repeat domain 51B, like (sim to UDP-N-acetyl-alpha-D-galactosamine:polypeptide N-acetylgalactosaminyltransferase 4 (GalNAc-T4))                                                           | CK707391          | GALNT2   | 1.99  | 2.29  |
| BC090692  | UDP-N-acetyl-alpha-D-galactosamine: polypeptide N-acetylgalactosaminyltransferase 7                                                                                                          | wdr51b1           | GALNT4   | -2.23 | -1.12 |
| BI896304  | Sim to GANAB   glucosidase, alpha; neutral AB                                                                                                                                                | galnt7            | GALNT7   | -2.14 | -1.30 |
| BI672775  | Growth associated protein 43                                                                                                                                                                 | LOC561509         | GANAB    | 1.03  | 1.58  |
| L27645    | Glyceraldehyde-3-phosphate dehydrogenase                                                                                                                                                     | gap43             | GAP43    | 0.20  | -4.13 |
| BC083506  | Nucleolar protein family A, member 1 (H/ACA small nucleolar RNPs)                                                                                                                            | gapdh             | GAPDH    | -1.64 | -1.45 |
| BM101651  | GATA-binding protein 5                                                                                                                                                                       | nola1             | GAR1     | 1.08  | -3.25 |
| AF191578  | 3' end of DKEY-183C23.2: Golgi-specific brefeldin A-resistance factor 1 and 3' to zgc:114051: sim to H2AFY: H2A histone family, member Y                                                     | gata5             | GATA5    | 4.04  | 1.40  |
| BM101878  | Glycine C-acetyltransferase                                                                                                                                                                  | gata6             | GATA6    | 2.27  | 3.52  |
| BM036082  | Glutaryl-Coenzyme A dehydrogenase                                                                                                                                                            | BM101878          | GBF1     | 0.48  | 2.27  |
| BG305473  | Glutaryl-Coenzyme A dehydrogenase, like                                                                                                                                                      | geat              | GCAT     | 1.73  | 2.03  |
| BI985053  | Glucagon a                                                                                                                                                                                   | gcdh              | CDH      | 1.28  | 2.45  |
| AJ133697  | GTP cyclohydrolase 1 feedback regulator                                                                                                                                                      | gcdhl             | CDH      | 3.47  | 1.98  |
| BI981470  | LOC553701 sim to guanine deaminase                                                                                                                                                           | gega              | CGC      | -0.53 | 4.81  |
| AW421330  | Growth differentiation factor 11                                                                                                                                                             | gchfr             | GCHFR    | 5.63  | 2.61  |
| AF411599  | Decapentaplegic and Vg-related 1 (sim to growth differentiation factor 3)                                                                                                                    | zgc:112282        | GDA      | 1.79  | 2.54  |
| U00931    | Growth differentiation factor 6a                                                                                                                                                             | gdf11             | GDF11    | 2.21  | -2.54 |
| BI475848  | Growth differentiation factor 7                                                                                                                                                              | dvr1              | GDF3     | -4.01 | -6.84 |
| AF113022  | Growth differentiation factor 9                                                                                                                                                              | gdf6a             | GDF6     | -0.32 | -2.07 |
| AY833104  | GDP dissociation inhibitor 2                                                                                                                                                                 | gdf7              | GDF7     | 0.73  | 2.74  |
| BI877998  | Glycerophosphodiester phosphodiesterase domain containing 3                                                                                                                                  | gdf9              | GDF9     | -0.21 | -3.49 |
| BE558157  | Gem (nuclear organelle) associated protein 4                                                                                                                                                 | gdi2              | GD12     | 5.33  | 1.88  |
| AW154507  | 5' end of DKEY-222H21.13 sim to gamma-glutamyltransferase 1 (DKEY-222H21.13)                                                                                                                 | gdpd3             | GDPD3    | -2.40 | -1.58 |
| BQ093548  | Weak sim to GTPase, IMAP family member 5                                                                                                                                                     | gemin4            | GEMIN4   | -2.16 | -1.21 |
| AI723254  | LOC503528 weak sim to GINI: gypsy retrotransposon integrase 1                                                                                                                                | BQ093548          | GTI1     | 4.72  | 2.12  |
| AF035481  | Connexin 43                                                                                                                                                                                  | AI723254          | GIMAP5   | 2.97  | -0.37 |
| BG303025  | Connexin 28.9                                                                                                                                                                                | zgc:113436        | GIN1     | -1.93 | -2.49 |
| AF465751  | Connexin 48.5                                                                                                                                                                                | cx43              | GJA1     | 2.48  | 0.52  |
| NM_212825 | Connexin 33.8                                                                                                                                                                                | cx28.9            | GJA3     | 3.49  | 3.15  |
| L46801    | Connexin 43.4 (gap junction protein, gamma 1, 45kDa)                                                                                                                                         | cx48.5            | GJA3     | -0.42 | 3.36  |
| BC081653  | Connexin 47.1 (gap junction protein, gamma 1, 45kDa)                                                                                                                                         | cx33.8            | GJB2     | 0.42  | 2.35  |
| BF171767  | LOC100136866 sim to glycerol kinase                                                                                                                                                          | cx43.4            | GJC1     | -2.69 | -4.30 |
| BI840365  | Galactosidase, beta 1-like                                                                                                                                                                   | cx47.1            | GJC1     | 2.43  | -1.58 |
| AY648848  | GLE1 RNA export mediator-like                                                                                                                                                                | zgc:172295        | GK       | 2.08  | 0.55  |
| AF085746  | GLI-Kruppel family member GLI2a                                                                                                                                                              | gbl1              | GLB1     | 3.72  | 0.63  |
|           |                                                                                                                                                                                              | gle11             | GLE1     | 0.95  | -2.17 |
|           |                                                                                                                                                                                              | gli2a             | GLI2     | -2.35 | -0.25 |



|              |                                                                                                                                                  |                   |          |       |       |
|--------------|--------------------------------------------------------------------------------------------------------------------------------------------------|-------------------|----------|-------|-------|
| BG303282     | 3' end of LOC565337: similar to glycolipid transfer protein domain containing and 3' end to atp1b2b:                                             | BG303282          | GLTPD1   | 3.01  | 2.51  |
| BI704327     | Sim to Glutamate-ammonia ligase (glutamine synthase) b                                                                                           | LOC798212         | GLUL     | -1.66 | -4.20 |
| BM184837     | Glycerate kinase                                                                                                                                 | zgc:153346        | GLYCK    | 4.60  | 1.55  |
| BE605276     | Glia maturation factor, beta                                                                                                                     | gmfb              | GMFB     | 1.92  | 0.93  |
| BM184447     | Geminin, DNA replication inhibitor                                                                                                               | gmnn              | GMNN     | -1.41 | -4.30 |
| BI885489     | 3' end of gmp: guanosine monophosphate reductase and 3' to atxn1b: ataxin 1b                                                                     | BI885489          | GMPR     | 5.44  | -1.18 |
| AI958597     | Guanine nucleotide binding protein (G protein), alpha inhibiting activity polypeptide 1                                                          | gnai1             | GNAI1    | -1.23 | -4.05 |
| AW116923     | Guanine nucleotide binding protein (G protein), alpha inhibiting activity polypeptide 2                                                          | gnai2             | GNAI2    | -2.04 | -3.08 |
| BI983956     | Guanine nucleotide binding protein (G protein) alpha v1                                                                                          | gnav1             | GNAI2    | 4.94  | 0.62  |
| BI318361     | Guanine nucleotide binding protein (G protein), alpha activating activity polypeptide O                                                          | gnao1             | GNAO1    | -0.48 | -2.42 |
| AY050499     | Guanine nucleotide binding protein (G protein), alpha transducing activity polypeptide 1                                                         | gnat1             | GNAT1    | -0.93 | -2.95 |
| BC076127     | Guanine nucleotide binding protein (G protein), beta polypeptide 3, like                                                                         | gnb3l             | GNB3     | -2.01 | -3.05 |
| AI588965     | 3' end of gmb5a   guanine nucleotide binding protein (G protein), beta 5a and 5' to ap4e1   adaptor-related protein complex 4, epsilon 1 subunit | wu:fb78e09        | GNB5     | 1.84  | -0.96 |
| BI883692     | Guanine nucleotide binding protein (G protein), gamma 12                                                                                         | gng12             | NGG12    | 2.70  | 0.70  |
| BM005415     | Guanine nucleotide binding protein (G protein), gamma 3                                                                                          | gng3              | NGG3     | -1.96 | -1.71 |
| BI879430     | Guanine nucleotide binding protein (G protein), gamma transducing activity polypeptide 1                                                         | ngnt1             | NGGT1    | -2.07 | -3.25 |
| BI318564     | LOC797361 sim to guanine nucleotide binding protein-gamma transducing activity polypeptide 2                                                     | LOC797361         | NGGT2    | -1.60 | -1.98 |
| BC045323     | Glucosamine (N-acetyl)-6-sulfatase (Sanfilippo disease IIID), b                                                                                  | gnsb              | GNS      | -0.11 | 2.03  |
| BM183894     | Glutamic-oxaloacetic transaminase 1, soluble                                                                                                     | got1              | GOT1     | -1.37 | -2.76 |
| BG306810     | Glycerol-3-phosphate dehydrogenase 1b                                                                                                            | gpd1b             | GPD1     | -0.62 | 3.56  |
| BC065340     | G protein-coupled receptor 143                                                                                                                   | gpr143            | GPR143   | -3.25 | -2.10 |
| BE605485     | G protein-coupled receptor 34 a                                                                                                                  | gpr34a            | GPR34    | 2.35  | 4.98  |
| BC054634     | LOC791773 sim to G protein-coupled receptor 39                                                                                                   | LOC791773         | GPR39    | 2.63  | 0.27  |
| AW595310     | Sim to G protein-coupled receptor 44                                                                                                             | LOC100000103      | GPR44    | -2.68 | -1.77 |
| AY619723     | G-protein signaling modulator 1 (AGS3-like, C. elegans)                                                                                          | gpsm1             | GPSM1    | -0.10 | 2.63  |
| CB890997     | Glutamic pyruvate transaminase (alanine aminotransferase) 2                                                                                      | gpt2              | GPT2     | 1.79  | -0.49 |
| AW232474     | Glutathione peroxidase 1a                                                                                                                        | gpx1a             | GPX1     | 3.78  | 3.52  |
| BI896246     | Glutathione peroxidase 4a                                                                                                                        | gpx4a             | GPX4     | 2.87  | 2.50  |
| BM036392     | Glutathione peroxidase 4b                                                                                                                        | gpx4b             | GPX4     | 2.54  | 2.69  |
| BC095199     | GRB2-related adaptor protein                                                                                                                     | grap              | GRAP     | -1.65 | 1.14  |
| BI886875     | Growth factor receptor-bound protein 2                                                                                                           | grb2              | GRB2     | -0.29 | 2.11  |
| AY427782     | Grem1l1 homolog, cysteine knot superfamily (Xenopus laevis)                                                                                      | grem1             | GREM1    | -2.93 | -2.53 |
| BI882203     | 3' end of grhl1   grainyhead-like 1 and 5' to kif11b Kruppel-like factor 11b                                                                     | BI882203          | GRHL1    | -3.44 | -1.07 |
| BE605668     | LOC55744 sim to grainyhead-like 2                                                                                                                | zgc:110324        | GRHL2    | -3.36 | -1.43 |
| AI477969     | LOC795386 sim to grainyhead-like 3                                                                                                               | sb:cb467          | GRHL3    | -2.51 | -2.53 |
| AF525742     | Glutamate receptor, ionotropic, AMPA 1b                                                                                                          | gria1b            | GRI1A    | -1.91 | -2.66 |
| AF273479     | LOC553977 weak sim to Granulin 1                                                                                                                 | LOC553977         | GRN      | -4.58 | 0.79  |
| BI865412     | Sim to GrpE-like 2, mitochondrial (E. coli)                                                                                                      | BI865412          | GRPEL2   | -3.02 | 0.55  |
| AI957790     | Growth hormone regulated TBC protein 1                                                                                                           | grtp1             | GRTP1    | 3.78  | 1.43  |
| AB032265     | Glycogen synthase kinase 3 beta                                                                                                                  | gsk3b             | GSK3B    | 0.56  | 3.23  |
| BG303563     | Gelsolin b                                                                                                                                       | gelsnb            | GSN      | -0.75 | -3.65 |
| AW128619     | G1 to S phase transition 1                                                                                                                       | gspt1             | GSPT1    | 0.35  | 1.94  |
| BF938011     | Glutathione S-transferase, alpha-like                                                                                                            | gstal             | GSTA1    | 1.22  | -2.37 |
| BM071872     | Glutathione S-transferase M                                                                                                                      | gstm              | GSTM3    | -0.56 | -2.54 |
| AF285098     | Glutathione S-transferase pi                                                                                                                     | gstp1             | GSTP1    | -1.29 | -1.77 |
| BC096997     | LOC573862 sim to glutathione transferase zeta 1                                                                                                  | zgc:113898        | GSTZ1    | 1.68  | 1.82  |
| BM104296     | Sim to general transcription factor IIA, 1, 19/37kDa                                                                                             | BM104296          | GTFA21   | -0.73 | -3.61 |
| BG307533     | General transcription factor IIA, 1                                                                                                              | gtfa2a1           | GTFA21   | -0.87 | -2.17 |
| BI705646     | General transcription factor IIE, polypeptide 2, beta                                                                                            | gtfe2             | GTFE2E   | 1.63  | -0.15 |
| BM103291     | General transcription factor IIIC, polypeptide 5                                                                                                 | gtfc5             | GTFC5    | 1.30  | 3.01  |
| AY850384     | Guanylate cyclase activator 1d                                                                                                                   | guac1d            | GUCA1A   | 2.59  | -2.49 |
| BI670894     | LOC791705 sim to Guanylate kinase 1                                                                                                              | guk1              | GUK1     | -2.74 | -6.05 |
| BI673452     | Glycogenin 1                                                                                                                                     | gyg1              | GYG1     | -4.07 | -3.32 |
| AW115892     | LOC394155 sim to glycogen synthase 1 (muscle)                                                                                                    | zgc:63701         | GSY1     | -2.57 | -1.20 |
| BC095660     | Glycogen synthase 2                                                                                                                              | gys2              | GSY2     | 0.86  | 4.27  |
| AI667668     | Sim to hyaluronan binding protein 2                                                                                                              | LOC563048         | HABP2    | 3.35  | 3.81  |
| AW115538     | 2-hydroxyacyl-CoA lyase 1                                                                                                                        | hacl1             | HACL1    | 1.49  | 1.90  |
| AI959469     | Hydroxyacylglutathione hydrolase                                                                                                                 | hagh              | HACH     | 0.70  | 2.98  |
| AY130989     | Hepcidin antimicrobial peptide 1; weak homol to HAMP; putative liver tumor regressor                                                             | hamp1             | HAMP     | 3.08  | 0.23  |
| AW777457     | Hydroxyacid oxidase (glycolate oxidase) 1                                                                                                        | hao1              | HAO1     | 3.74  | 4.80  |
| AI973901     | Hyaluronan and proteoglycan link protein 1a                                                                                                      | hapln1a           | HAPLN1   | 1.66  | -1.70 |
| AI957786     | Histidyl-tRNA synthetase                                                                                                                         | hars              | HARS     | 1.79  | 1.40  |
| U50380       | Ba1 globin                                                                                                                                       | ba1               | HBE1     | 1.92  | 2.83  |
| CN022310     | LOC445037 sim to hemoglobin, gamma A                                                                                                             | zgc:92880         | HBG1     | 1.87  | -0.66 |
| BE693186     | Hemoglobin alpha embryonic-1                                                                                                                     | hbac1             | HBZ      | -1.87 | -3.67 |
| BI704340     | Histone deacetylase 1                                                                                                                            | hdac1             | HDAC1    | -1.83 | 1.31  |
| AI667295     | HECT domain containing 3                                                                                                                         | hectd3            | HECTD3   | 1.81  | 2.63  |
| AW154320     | Helicase, lymphoid-specific                                                                                                                      | hells             | HELLS    | -0.37 | -3.96 |
| AF301264     | Hairy-related 9                                                                                                                                  | her9              | HES1     | -2.03 | 0.69  |
| X97331       | Hairy-related 3                                                                                                                                  | her3              | HES3     | 0.36  | -1.72 |
| AW117106     | Hairy-related 4.1                                                                                                                                | CH73-21G5.4       | HES5     | 3.11  | -1.33 |
| BC092915     | Hairy-related 12                                                                                                                                 | her12             | HES5     | 1.02  | -1.77 |
| BM072241     | LOC678530 sim to hairy and enhancer of split 5                                                                                                   | zgc:136520        | HES5     | 1.44  | 2.13  |
| NM_194400    | Hairy and enhancer of split 6 (Drosophila)                                                                                                       | hes6              | HES6     | -0.17 | -0.17 |
| AY312568     | Hairy-related 11 (sim to hairy and enhancer of split 7 (Drosophila))                                                                             | her11             | HES7     | -1.09 | -3.40 |
| X95301       | Hairy-related 5                                                                                                                                  | her5              | HES7     | 3.81  | 0.24  |
| AF240772     | Hairy and enhancer of split related-7                                                                                                            | her7              | HES7     | 0.47  | -1.51 |
| BG306318     | Hexosaminidase A (alpha polypeptide)                                                                                                             | hexa              | HEXB     | -0.02 | 2.13  |
| CK707179     | Weak sim to hexosaminidase (glycosyl hydrolase family 20, catalytic domain) containing Hairy/enhancer-of-split related with YRPW motif 1         | CK707179          | HEXDC    | 2.43  | 2.60  |
| BG985516     | LOC550603 weak sim to major histocompatibility complex, class I-related                                                                          | hey1              | HEY1     | -2.65 | 0.81  |
| BC093422     | LOC571120 sim to hedgehog acyltransferase-like                                                                                                   | zgc:113060        | MR1      | 1.30  | 1.75  |
| AI626348     | Hematopoietically expressed homeobox                                                                                                             | zgc:154131        | HHATL    | -1.36 | -1.70 |
| AF131070     | 3-hydroxyisobutyrate dehydrogenase                                                                                                               | hhex              | HHEX     | 3.43  | 3.87  |
| BM095392     | 3-hydroxyisobutyryl-Coenzyme A hydrolase                                                                                                         | hibadhb           | HIBADH   | 1.36  | -2.24 |
| BI476765     | Hypermethylation in cancer 1 like                                                                                                                | hibch             | HIBCH    | 2.41  | 0.88  |
| AF111712     | Hypoxia induced gene 1 (sim to HIG1 domain family, member 1A)                                                                                    | hic1l             | HIC2     | -1.02 | -2.58 |
| BI892416     | Sim to huntingtin interacting protein 1                                                                                                          | higl              | HIGD1A   | -1.21 | -2.02 |
| AW170846     | LOC568076; HIR histone cell cycle regulation defective homolog A (S. cerevisiae)                                                                 | AW170846          | HIP1     | -3.74 | -0.47 |
| AI957899     | LOC569609 weak sim to histidine acid phosphatase domain containing 1                                                                             | hira              | HIRA     | 2.78  | 0.36  |
| BI707054     | Intron of mhc1uda   major histocompatibility complex class I UDA gene                                                                            | LOC569609         | HISPPD1  | -2.08 | -2.34 |
| BI705577     | Major histocompatibility complex class I UDA gene                                                                                                | BI705577          | HLA-A    | -0.85 | -1.57 |
| AW076914     | Major histocompatibility complex class I UDA gene                                                                                                | mhc1uda           | HLA-A    | -3.93 | -3.34 |
| CV576541     | Major histocompatibility complex class I ZE gene                                                                                                 | mhc1ze            | HLA-A    | 2.24  | -1.25 |
| NM_001004521 | LOC368878 weak sim to major histocompatibility complex, class II, DP alpha 1                                                                     | si:busm1-266f07.2 | HLA-DPA1 | -1.86 | -1.92 |
| L19450       | LOC449802 sim to major histocompatibility complex, class II, DP alpha 1                                                                          | zgc:92049         | HLA-DPA1 | -1.82 | -1.58 |
| L19449       | Sim to major histocompatibility complex, class II, DQ alpha 1                                                                                    | L19449            | HLA-DQA1 | 2.40  | 0.81  |
| CN020335     | LOC449802 weak sim to major histocompatibility complex, class II, DQ alpha 1                                                                     | zgc:113912        | HLA-DQA1 | -2.48 | -2.53 |
| U08870       | Major histocompatibility complex class II DAB gene                                                                                               | mhc2dab           | HLA-DQB1 | -3.07 | -1.32 |
| BI886388     | LOC795095 sim to high-mobility group box 1                                                                                                       | zgc:165618        | HMGBl    | -2.28 | -1.01 |
| AW777535     | High-mobility group box 2                                                                                                                        | hmgb2             | HMGBl    | 2.77  | -2.24 |
| CK703815     | 3' end of hmgrb: 3-hydroxy-3-methylglutaryl-Coenzyme A reductase b                                                                               | CK703815          | HMGCR    | 2.27  | 0.96  |
| BM036445     | Hyaluronan mediated motility receptor                                                                                                            | hmmr              | HMMR     | -3.46 | -5.01 |
| AI722432     | Heme oxygenase (deacyling) 1                                                                                                                     | hmox1             | HMOX1    | -0.64 | 2.63  |
| AF288211     | Homeo box (H6 family) 3                                                                                                                          | hmox3             | HMX3     | -2.92 | -1.96 |
| BG883304     | Hepatocyte nuclear factor 4, alpha                                                                                                               | hnf4a             | HNF4A    | 0.08  | 3.47  |
| BC066434     | Heterogeneous nuclear ribonucleoprotein A0                                                                                                       | hnmpa0            | HNRNPA0  | -0.37 | 1.90  |
| BC048898     | Heterogeneous nuclear ribonucleoprotein A/B                                                                                                      | hnrap             | HNRNPAB  | -2.35 | 0.34  |
| BI888859     | Heterogeneous nuclear ribonucleoprotein D-like                                                                                                   | hnrdl             | HNRNPD   | 0.12  | 1.73  |
| BI880061     | Heterogeneous nuclear ribonucleoprotein M                                                                                                        | hnmpm             | HNRNPM   | 3.74  | 0.68  |

|           |                                                                                                                                         |                 |          |       |       |
|-----------|-----------------------------------------------------------------------------------------------------------------------------------------|-----------------|----------|-------|-------|
| BI878475  | Heterogeneous nuclear ribonucleoprotein R                                                                                               | hnpr            | HNRNPR   | -1.50 | 0.49  |
| AI793802  | Homeodomain leucine zipper gene                                                                                                         | homez           | HOMZ     | 3.78  | 0.95  |
| AF071243  | Homeo box A1a                                                                                                                           | hoxa1a          | HOXA1    | 1.95  | 0.42  |
| BC090761  | Homeo box A13b                                                                                                                          | hoxa13b         | HOXA13   | -2.74 | -2.84 |
| AF307010  | Homeo box A2b                                                                                                                           | hoxa2b          | HOXA2    | -3.27 | -1.24 |
| Y13944    | Homeo box B3a                                                                                                                           | hoxb3a          | HOXB3    | 0.23  | 2.02  |
| NM_131537 | Homeo box B5b                                                                                                                           | hoxb5b          | HOXB5    | 0.08  | -6.57 |
| AY391430  | Homeo box B9a                                                                                                                           | hoxb9a          | HOXB9    | 2.25  | 5.40  |
| NM_131122 | Homeo box C4a                                                                                                                           | hoxc4a          | HOXC4    | -2.85 | -3.15 |
| NM_131126 | Homeo box D9a                                                                                                                           | hoxd9a          | HOXD9    | -3.95 | -4.70 |
| X87750    | Homeo box D10a                                                                                                                          | hoxd10a         | HOXD10   | 2.17  | -0.68 |
| NM_131169 | Homeo box D13a                                                                                                                          | hoxd13a         | HOXD13   | 0.28  | -4.01 |
| Y14548    | Homeo box D4a                                                                                                                           | hoxd4a          | HOXD4    | 3.49  | 0.62  |
| BG884044  | Haptoglobin                                                                                                                             | hp              | HP       | 3.84  | 6.10  |
| BM035892  | Hypoxanthine phosphoribosyltransferase 1, like                                                                                          | hprt1l          | HPRT1    | 0.32  | -2.87 |
| AW116610  | 3' end of hpx ; hemopexin                                                                                                               | AW116610        | HPX      | 0.70  | -2.66 |
| BI880365  | Heparan sulfate 6-O-sulfotransferase 1a                                                                                                 | hs6st1a         | HS6ST1   | 0.11  | 2.76  |
| BG305366  | Heat shock factor binding protein 1                                                                                                     | hsbp1           | HSBP1    | 2.82  | 0.33  |
| BF717644  | Hydroxysteroid (11-beta) dehydrogenase 3                                                                                                | hsd11b3         | HSD11B1L | -0.29 | 3.49  |
| BC083219  | Hydroxysteroid (17-beta) dehydrogenase 10                                                                                               | hsd17b10        | HSD17B10 | 1.30  | -2.49 |
| AW116075  | Hydroxysteroid (17-beta) dehydrogenase 12a                                                                                              | hsd17b12a       | HSD17B12 | -1.42 | -2.84 |
| AI558603  | Hydroxysteroid (17-beta) dehydrogenase 12b                                                                                              | hsd17b12b       | HSD17B12 | 2.01  | 2.36  |
| AF068773  | Heat shock protein 90-alpha 1                                                                                                           | hsp90a.1        | HSP90AA1 | 0.28  | 2.17  |
| AF068772  | Heat shock protein 90kDa alpha (cytosolic), class B member 1                                                                            | hsp90ab1        | HSP90AB1 | -0.66 | 2.13  |
| AW116618  | Heat shock protein 4, like                                                                                                              | hspa4l          | HSPA4    | -1.69 | 3.79  |
| BC052971  | Heat shock 70kDa protein 5 (glucose-regulated protein)                                                                                  | hspa5           | HSPA5    | -0.37 | 2.57  |
| AB062116  | Heat shock cognate 70-kd protein like                                                                                                   | hsp70l          | HSPA8    | -2.81 | 3.59  |
| L77146    | Heat shock protein 8                                                                                                                    | hspa8           | HSPA8    | -1.05 | 1.54  |
| BM072378  | Heat shock 70kDa protein 9 (mortalin)                                                                                                   | hspa9           | HSPA9    | -0.90 | 2.31  |
| AI878489  | Heat shock protein, alpha-crystallin-related, b8                                                                                        | hspb8           | HSPB8    | 1.54  | 1.74  |
| BI896507  | Heat shock 60kD protein 1 (chaperonin)                                                                                                  | hspd1           | HSPD1    | 2.68  | 1.68  |
| AF273739  | Heat shock 10kD protein 1 (chaperonin 10)                                                                                               | hspel           | HSPE1    | -2.63 | 2.35  |
| BQ074738  | LOC791189 sim to HYAL2: hyaluronoglucosaminidase 1                                                                                      | zgc:158626      | HYAL1    | 2.46  | 3.90  |
| AW777557  | 3' end of LOC567869 sim to HYAL2: hyaluronoglucosaminidase 2 and 5' to zgc:136804: sim to HYAL1: hyaluronoglucosaminidase 1             | AW777557        | HYAL2    | 1.60  | 3.60  |
| BI876732  | Hypoxia up-regulated 1                                                                                                                  | hyou1           | HYOU1    | 0.29  | 2.21  |
| AF007414  | Inhibitor of DNA binding 1                                                                                                              | id1             | ID1      | 0.22  | 2.59  |
| BI880095  | Inhibitor of DNA binding 2, dominant negative helix-loop-helix protein, b                                                               | id2b            | ID2      | -0.56 | 2.54  |
| BI884399  | 3' end of idh3a   isocitrate dehydrogenase 3 (NAD+) alpha                                                                               | BI884399        | IDH3A    | -0.48 | 2.36  |
| BI890609  | Interferon gamma inducible protein 30                                                                                                   | if30            | IFI30    | -2.72 | -2.35 |
| AW018996  | Weak sim to IFI44   interferon-induced protein 44                                                                                       | wu:fd58b05      | IFI44    | -2.66 | -2.72 |
| BE605771  | Sim to interferon induced transmembrane protein 5                                                                                       | wu:fa95e04      | IFITM1   | -3.38 | -1.91 |
| AI158361  | Interferon, gamma 1-2                                                                                                                   | ifng1-2         | IFNG     | -1.35 | -1.54 |
| AF268051  | Insulin-like growth factor 1 (somatomedin C)                                                                                            | igf1            | IGF1     | 2.90  | 3.73  |
| AF194333  | Insulin-like growth factor 2a                                                                                                           | igf2a           | IGF2     | 0.63  | 2.07  |
| AI878099  | Intergenic 3' to igf2bp1   insulin-like growth factor 2 mRNA binding protein 1 and 5' to wu:fb21f05 weak sim to ZWINT   ZW10 interactor | AI878099        | IGF2BP1  | -2.62 | -2.17 |
| AJ299409  | Insulin-like growth factor binding protein 1                                                                                            | igfbp1          | IGFBP1   | 0.71  | 5.40  |
| AF198033  | Insulin-like growth factor binding protein 2a                                                                                           | igfbp2a         | IGFBP2   | 2.14  | 3.09  |
| AJ299410  | Insulin-like growth factor binding protein 3                                                                                            | igfbp3          | IGFBP3   | 1.73  | 4.11  |
| AB194243  | Interleukin 15, like; weak sim                                                                                                          | il15l           | IL15     | 1.21  | 2.40  |
| AW116942  | 3' end of LOC100149069   similar to interleukin 16 and 5' to aqp10   aquaporin 10                                                       | AW116942        | IL16     | -2.67 | -1.75 |
| AF364103  | Interleukin 17 receptor D                                                                                                               | il17rd          | IL17RD   | -1.00 | -2.12 |
| BI891114  | IMP4, U3 small nucleolar ribonucleoprotein, homolog (yeast)                                                                             | imp4            | IMP4     | -2.11 | -2.10 |
| AW115597  | IMP (inosine monophosphate) dehydrogenase 2                                                                                             | impdh2          | IMPDH2   | -3.21 | 0.37  |
| CK704021  | Inhibitor of growth family, member 5a                                                                                                   | ing5a           | ING5     | -0.60 | -1.84 |
| X76051    | Inhibin, beta B (activin)                                                                                                               | inhbb           | INHBB    | 0.52  | 2.52  |
| BC045341  | Insulin induced gene 1                                                                                                                  | insig1          | INSIG1   | 1.37  | 3.69  |
| BI474280  | Insulin receptor a                                                                                                                      | insra           | INSR     | 1.74  | 0.63  |
| BI866892  | Sim to integrator complex subunit 2                                                                                                     | BI866892        | INTS2    | -1.61 | -1.64 |
| BI887357  | Sim to integrator complex subunit 2                                                                                                     | BI887357        | INTS2    | 1.73  | 0.36  |
| BM103255  | Similar to Ran, GTP binding protein 5 (sim to importin 5)                                                                               | LOC569455       | IPO5     | -2.29 | 0.39  |
| BI710379  | LOC553809 sim to interleukin-1 receptor-associated kinase 1 binding protein 1                                                           | zgc:112481      | IRAK1BP1 | -0.93 | -1.91 |
| BI326597  | Interferon regulatory factor 11                                                                                                         | irf11           | IRF1     | -1.90 | -2.43 |
| BC066724  | Interferon regulatory factor 10                                                                                                         | irf10           | IRF4     | -1.55 | -1.91 |
| AW567349  | LOC562007 sim to immunoresponsive 1 homolog                                                                                             | zgc:154020      | IRG1     | -2.95 | -3.68 |
| CK015631  | Iron-sulfur cluster assembly 1                                                                                                          | isca1           | ISCA1    | -0.71 | -1.66 |
| D21135    | Islet1                                                                                                                                  | isl1            | ISL1     | -3.29 | -1.11 |
| AY423019  | Islet1, like                                                                                                                            | isl1l           | ISL1     | 0.63  | 3.54  |
| BE557035  | Sim to integrin, alpha 2 (CD49B, alpha 2 subunit of VLA-2 receptor)                                                                     | LOC100151619    | ITGA2    | -1.42 | -1.64 |
| AI545475  | Sim to integrin, alpha 3 (antigen CD49C, alpha 3 subunit of VLA-3 receptor)                                                             | AI545475        | ITGA3    | -3.59 | -3.00 |
| AW595107  | Intron of itga6b   integrin, alpha 6b                                                                                                   | wu:fk35c01      | ITGA6    | -1.55 | -1.35 |
| CV576657  | Muscle-specific beta 1 integrin binding protein 2                                                                                       | mibp2           | ITGB1BP3 | 1.63  | 0.63  |
| BE557429  | Integrin, beta 4                                                                                                                        | itgb4           | ITGB4    | -1.90 | -1.50 |
| BI840469  | 3' end of itgb4   integrin, beta 4 and 3' to zgc:194990 sim to TRIM39   tripartite motif-containing 39                                  | wu:fk35c01      | ITGB4    | -1.75 | -3.37 |
| BM095331  | Inter-alpha (globulin) inhibitor H3                                                                                                     | itih3           | ITIH3    | 5.02  | 6.86  |
| BC095235  | LOC553614 sim to inter-alpha (globulin) inhibitor H3                                                                                    | zgc:110377      | ITIH3    | 5.36  | 3.86  |
| AW018989  | LOC100003906 sim to inter-alpha (globulin) inhibitor H3                                                                                 | zgc:112265      | ITIH3    | 3.31  | 3.64  |
| BM104075  | Integral membrane protein 2B a                                                                                                          | itm2ba          | ITM2B    | 1.07  | 2.82  |
| BI839853  | Integral membrane protein 2Bb                                                                                                           | itm2bb          | ITM2B    | 0.34  | 2.48  |
| BE202129  | LOC568010 sim to inositol 1,4,5-triphosphate receptor, type 3                                                                           | LOC568010       | ITPR3    | -1.01 | -2.30 |
| BI839972  | Influenza virus NS1A binding protein a                                                                                                  | ivns1abpa       | IVNS1ABP | 3.16  | 0.55  |
| AW344202  | Influenza virus NS1A binding protein b                                                                                                  | ivns1abpb       | IVNS1ABP | -2.85 | -3.90 |
| AF229448  | Jagged 1a                                                                                                                               | jag1a           | JAG1     | -1.36 | 2.08  |
| AF229451  | Jagged 1b                                                                                                                               | jag1b           | JAG1     | 2.35  | 4.12  |
| AF229449  | Jagged 2                                                                                                                                | jag2            | JAG2     | -1.41 | -2.11 |
| U82980    | Janus kinase 1                                                                                                                          | jak1            | JAK1     | 0.14  | 2.88  |
| AI584430  | 3' end of jak1 Janus kinase 1                                                                                                           | wu:fb93e10      | JAK1     | 1.66  | 1.08  |
| AJ005690  | Janus kinase 2a                                                                                                                         | jak2a           | JAK2     | -0.31 | 1.67  |
| BI980014  | Junctional adhesion molecule 3                                                                                                          | jam3            | JAM3     | 2.13  | 0.74  |
| BI326453  | Jun dimerization protein 2                                                                                                              | zgc:92851       | JDP2     | -1.51 | -1.31 |
| BM095408  | Jumonji domain containing 6                                                                                                             | jmjd6           | JMJD6    | -1.00 | -2.95 |
| AA542460  | JPH2 protein sim to junctophilin 2                                                                                                      | zgc:162172      | JPH2     | -2.59 | -1.06 |
| BE605692  | -J-vun sarcoma virus 17 oncogene homolog (avian)                                                                                        | jun             | JUN      | 0.42  | 2.09  |
| BC053234  | Jun B proto-oncogene                                                                                                                    | junb            | JUNB     | 2.64  | 0.68  |
| BE606155  | Jun B proto-oncogene, like                                                                                                              | junbl           | JUNB     | 1.74  | 5.35  |
| BI889237  | K(lysine) acetyltransferase 5                                                                                                           | zgc:92510       | KAT5     | -1.63 | 0.63  |
| AI793533  | Kelch repeat and BTB (POZ) domain containing 10                                                                                         | kbtbd10         | KBTBD10  | -0.88 | -1.63 |
| AA606074  | 3' end of LOC795942   similar to potassium channel Kv1.1a and 5' to cat catalase                                                        | wu:fa27a01      | KCNA1    | -1.02 | -1.76 |
| AI657747  | Similar to Kv3.3 potassium channel subunit                                                                                              | LOC559096       | KCNK1    | 1.19  | 1.73  |
| BC055133  | Potassium inwardly-rectifying channel, subfamily J, member 1                                                                            | kcnpj1          | KCNJ1    | 2.42  | 3.43  |
| AW018995  | 3' end of zgc:123268 and 3' to LOC100000818 similar to cGMP-dependent protein kinase 1, beta isozyme (cGK 1 beta) (cGKI-beta)           | si:dky-121j17.5 | KCNK2    | -0.89 | -1.53 |
| BM102180  | Potassium channel tetramerisation domain containing 12.1                                                                                | kctd12.1        | KCTD12   | 2.44  | 3.47  |
| BM071271  | Potassium channel tetramerisation domain containing 12.2                                                                                | kctd12.2        | KCTD12   | -2.27 | 1.12  |
| BM156084  | LOC431771 sim to potassium channel tetramerisation domain containing 4                                                                  | zgc:92463       | KCTD4    | 3.56  | 1.95  |
| AW567098  | Potassium channel tetramerisation domain                                                                                                | zgc:77244       | KCTD5    | -1.59 | -1.05 |
| BC076416  | Potassium channel tetramerisation domain containing 9                                                                                   | kctd9           | KCTD9    | -2.43 | -2.35 |
| BM154091  | Potassium channel tetramerisation domain containing 9                                                                                   | zgc:113115      | KCTD9    | 3.00  | 0.94  |
| BI891150  | KDEL (Lys-Asp-Glu-Leu) endoplasmic reticulum protein retention receptor 2                                                               | kdelr2          | KDELR2   | -0.37 | 2.66  |
| AW175431  | Kelch-like ECH-associated protein 1a                                                                                                    | keap1a          | KEAP1    | 0.70  | 2.68  |

|           |                                                                                                                                                        |                   |          |       |       |
|-----------|--------------------------------------------------------------------------------------------------------------------------------------------------------|-------------------|----------|-------|-------|
| AW076648  | Ketohexokinase                                                                                                                                         | khk               | KHK      | 1.89  | -0.97 |
| BI897419  | Limb and neural patterns a (lunapark)                                                                                                                  | lnpa              | KIAA1715 | -2.36 | -3.76 |
| AF139990  | Kinesin family member 23                                                                                                                               | kif23             | KIF23    | -3.65 | -5.34 |
| AL727928  | Kinesin-associated protein 3                                                                                                                           | kifap3            | KIFAP3   | -1.68 | -2.84 |
| AF181248  | Kinesin family member C1                                                                                                                               | kifc1             | KIFC1    | -2.44 | -3.77 |
| AI793626  | KIN, antigenic determinant of recA protein homolog                                                                                                     | kin               | KIN      | 3.15  | 2.56  |
| AY929068  | Kit ligand a                                                                                                                                           | kitlg             | KITLG    | -0.33 | 3.48  |
| BI429411  | Kruppel-like factor 12a                                                                                                                                | kfl12a            | KLF12    | 1.16  | 1.64  |
| AW077452  | 3' end of zgc:111869 Kruppel-like factor 15 alternative spliced                                                                                        | AW077452          | KLF15    | 2.83  | 0.88  |
| AF392992  | Kruppel-like factor 2a                                                                                                                                 | kfl2a             | KLF2     | -2.08 | 1.18  |
| AF392995  | Kruppel-like factor 2b                                                                                                                                 | kfl2b             | KLF2     | 0.20  | 1.88  |
| AF392993  | Kruppel-like factor 3 (basic)                                                                                                                          | kfl3              | KLF3     | -3.56 | 1.31  |
| AF262978  | Kruppel-like factor 4                                                                                                                                  | kfl4              | KLF4     | -3.57 | -1.87 |
| AF392996  | Kruppel-like factor d                                                                                                                                  | kfld              | KLF4     | -1.56 | 0.04  |
| BI428467  | Core promoter element binding protein                                                                                                                  | copeb             | KLF6     | -2.14 | 2.74  |
| BE605860  | 3' end of si:ch211-208m1.2 sim to KLF8   Kruppel-like factor 8 and 3' to zgc:136851 sim to KLF5   Kruppel-like factor 5 (intestinal)                   | wu:fl22e07        | KLF8     | -3.48 | -0.99 |
| AI584555  | Keleb-like 31 (Drosophila)                                                                                                                             | klhl31            | KLHL31   | 4.59  | -1.14 |
| BM104473  | Kynurenine 3-monooxygenase                                                                                                                             | kmo               | KMO      | 1.48  | 3.53  |
| BE200743  | Intron of sidikeyp-7e9.1 sim to KREMEN1: kringle containing transmembrane protein 1                                                                    | wu:fk90e01        | KREMEN1  | 1.42  | 1.71  |
| AI477935  | LOC550250 sim to KRT14   keratin 14                                                                                                                    | zgc:110712        | KRT14    | 1.57  | 1.02  |
| BE200701  | NP_001107814 sim to keratin 15                                                                                                                         | si:dkieyp-113d7.4 | KRT15    | -1.52 | -1.43 |
| BC076059  | Keratin 12                                                                                                                                             | zgc:92533         | KRT17    | -4.03 | -1.11 |
| BE200731  | Keratin, type 1, gene 19d                                                                                                                              | krt1-19d          | KRT17    | -3.87 | -3.73 |
| BC075874  | LOC792173 sim to cytookeratin 17                                                                                                                       | zgc:92061         | KRT17    | -4.73 | -4.94 |
| BC045869  | Keratin 18                                                                                                                                             | krt18             | KRT18    | -0.42 | 3.08  |
| AW018538  | LOC553479 sim to keratin 18                                                                                                                            | si:ch211-133j6.3  | KRT18    | 1.54  | 1.45  |
| BG304957  | Keratin-like (sim to keratin 18)                                                                                                                       | zgc:77517         | KRT18    | -2.02 | -0.82 |
| BE017931  | Weak sim to keratin 19                                                                                                                                 | wu:fk65e09        | KRT19    | -2.97 | -3.06 |
| AW076578  | LOC436665 sim to keratin 19                                                                                                                            | zgc:92035         | KRT19    | -3.84 | -1.44 |
| AF134850  | Keratin 4                                                                                                                                              | krt4              | KRT8     | -2.86 | -2.05 |
| AF197909  | Keratin 5                                                                                                                                              | krt5              | KRT8     | -5.62 | -1.05 |
| BI704281  | Keratin 8                                                                                                                                              | krt8              | KRT8     | 0.51  | 3.32  |
| AI477659  | LOC100009654 sim to keratin 8                                                                                                                          | zgc:158846        | KRT8     | -2.65 | -4.16 |
| BI877539  | 3-ketodihydroxyproline reductase                                                                                                                       | kdsr              | KSR      | 2.99  | -1.25 |
| BM081030  | Intergenic 3' to si:ch211-240j18.3 and 5' to nos1 nitric oxide synthase 1 (neuronal)                                                                   | BM081030          | KSR2     | 2.14  | 0.43  |
| AW019697  | L-2-hydroxyglutarate dehydrogenase                                                                                                                     | L2hgdh            | L2HGDH   | 1.85  | 0.39  |
| BG728552  | Weak sim to laminin, alpha 4                                                                                                                           | BG728552          | LAMA4    | -0.15 | -2.19 |
| BI850028  | Laminin, beta 1                                                                                                                                        | lamb1             | LAMB1    | 0.37  | 1.73  |
| AF395739  | LAG1 homolog, ceramide synthase 2 (S. cerevisiae)                                                                                                      | lass2             | LASS2    | 1.76  | 2.81  |
| BM082387  | LOC393492 sim to LBH   limb bud and heart development homolog                                                                                          | zgc:66337         | LBH      | -1.36 | -2.44 |
| AW566983  | 5' of zgc:136695; LOC678576; lymphocyte-specific protein tyrosine kinase                                                                               | wu:ff94h02        | LCK      | -1.96 | -2.48 |
| AF157110  | Lymphocyte cytosolic plastin 1                                                                                                                         | lcp1              | LCP1     | 0.75  | 2.32  |
| AF031378  | LIM-domain binding factor 1a                                                                                                                           | ldb1a             | LDB1     | 3.39  | 0.13  |
| AF172089  | Lefty1                                                                                                                                                 | lft1              | LEFTY2   | 3.06  | 0.53  |
| BM155827  | Lectin, galactoside-binding, soluble, 1 (galectin 1)-like 1                                                                                            | lgals11           | LGALS1   | -2.64 | 0.41  |
| AI958097  | Lectin, galactoside-binding, soluble, 3 (galectin 3)-like                                                                                              | lgals3l           | LGALS3   | 0.35  | 3.72  |
| AW421190  | Weak sim to lectin, galactoside-binding, soluble, 3 binding protein                                                                                    | AW421190          | LGALS3BP | -2.07 | -2.88 |
| BI427732  | LOC567193 weak sim to lectin, galactoside-binding, soluble, 4 (galectin 4)                                                                             | LOC567193         | LGALS4   | -3.35 | -1.54 |
| NM_205622 | Luteinizing hormone, beta polypeptide                                                                                                                  | lhb               | LHB      | -2.17 | -2.17 |
| AF001299  | LIM homeobox 1b                                                                                                                                        | lhx1b             | LHX1     | 1.21  | -3.86 |
| I42547    | LIM homeobox 5                                                                                                                                         | lhx5              | LHX5     | 1.50  | 0.43  |
| BG303217  | 3' end of dkcy-267j14.1; solute carrier family 44 member 5-B and 3' end of LOC799481: sim to LIM homeobox 8                                            | BG303217          | LHX8     | 1.16  | 1.75  |
| BM023806  | LIM homeobox 9                                                                                                                                         | lhx9              | LHX9     | 1.95  | 0.54  |
| AW281831  | DNA ligase (ATP) 1                                                                                                                                     | si:dkieyp-35b8.5  | LIG1     | -1.06 | -1.80 |
| AF307846  | LIM domain and actin binding 1                                                                                                                         | lima1             | LIMA1    | -1.92 | -3.61 |
| AW419601  | Lin-7 homolog B (C. elegans)                                                                                                                           | lin7b             | LIN7B    | 0.86  | 2.20  |
| BM096032  | Lipase, gastric (lysosomal acid, cholesterol esterase)                                                                                                 | lipf              | LIPA     | 3.10  | -0.88 |
| AW018709  | Lipase, hepatic                                                                                                                                        | lipc              | LIPC     | 2.08  | 0.98  |
| BM005190  | Lipase, endothelial                                                                                                                                    | lipg              | LIPG     | 1.03  | 5.39  |
| BC074085  | Lipopolysaccharide-induced TNF factor                                                                                                                  | litaf             | LITAF    | -1.57 | -2.07 |
| AI497491  | Wu:fb60g05 sim to lipopolysaccharide-induced TNF factor                                                                                                | wu:fb60g05        | LITAF    | -1.29 | -2.93 |
| AW175541  | Lectin, mannose-binding, 1                                                                                                                             | lman1             | LMAN1    | 1.90  | 2.61  |
| BI889893  | Limb region 1 like                                                                                                                                     | lmb1              | LMBR1L   | -1.77 | -0.31 |
| BG985851  | LIM domain only 4                                                                                                                                      | lmo4              | LMO4     | 1.56  | 1.13  |
| BI981135  | LIM domain only 4, like                                                                                                                                | lmo4l             | LMO4     | 0.48  | -3.81 |
| BI866375  | Ligand of numb-protein X 1                                                                                                                             | lnx1              | LNK1     | -1.12 | -2.49 |
| BG302899  | Lysyl oxidase                                                                                                                                          | lox               | LOX      | -2.67 | -1.37 |
| BI708370  | Sim to lysophosphatidic acid receptor 1                                                                                                                | BI708370          | LPAR1    | -2.42 | -0.65 |
| U57656    | Lipoprotein lipase                                                                                                                                     | lpl               | LPL      | 3.55  | 2.60  |
| AW343191  | LOC55346 weak sim to leucine-rich alpha-2-glycoprotein 1                                                                                               | si:dkieyp-90m5.4  | LRG1     | 2.36  | 2.56  |
| AI82956   | LOC559670 sim to leucine-rich repeats and guanylate kinase domain containing                                                                           | si:ch211-234m22.1 | LRGUK    | 1.79  | 0.85  |
| BE017901  | Sim to low density lipoprotein-related protein 1 (alpha-2-macroglobulin receptor)                                                                      | LOC565797         | LRP1     | 2.16  | 2.22  |
| BM023753  | Sim to low density lipoprotein-related protein 1 (alpha-2-macroglobulin receptor)                                                                      | wu:ff39b01        | LRP1     | -1.62 | 2.93  |
| AW077459  | Intergenic 3' to lrp11: low density lipoprotein receptor-related protein 11 and 3' to pcmt: protein-L-isoaspartate (D-aspartate) O-methyltransferase 1 | AW077459          | LRP11    | 2.64  | -3.18 |
| BI878642  | Low density lipoprotein receptor-related protein associated protein 1                                                                                  | lrpap1            | LRPAP1   | -1.29 | 1.88  |
| AW23607   | Leucine-rich PPR-motif containing                                                                                                                      | lrpprc            | LRPPRC   | -2.51 | -3.65 |
| BE201896  | Leucine rich repeat containing 17                                                                                                                      | lrcc17            | LRRC17   | 1.06  | 4.90  |
| AW116894  | Leucine rich repeat containing 8 family, member A                                                                                                      | lrcc8a            | LRRC8A   | 2.49  | 0.82  |
| BM186492  | Sim to LSM3 homolog, U6 small nuclear RNA associated (S.cerevisiae)                                                                                    | BM186492          | LSM3     | 2.02  | 1.39  |
| BI878336  | 3' end of LOC100002518   similar to lymphocyte antigen 75 and 3' to zgc:162904 sim to TSPAN3   tetraspanin 3                                           | BI878336          | LY75     | 1.88  | -0.56 |
| NM_152974 | Mab-21-like 1                                                                                                                                          | mab21l1           | MAB21L1  | -1.28 | -5.59 |
| BC050170  | MAD1 mitotic arrest deficient-like 1                                                                                                                   | mad1l1            | MAD1L1   | -1.73 | -2.38 |
| BI704353  | Sim to MAD2L1 binding protein                                                                                                                          | LOC100148094      | MAD2L1BP | -2.57 | -1.41 |
| AB006322  | V-maf musculoaponeurotic fibrosarcoma oncogene family, protein B (avian)                                                                               | mafba             | MAF      | 4.31  | 2.99  |
| AB006324  | V-maf musculoaponeurotic fibrosarcoma (avian) oncogene family, protein L                                                                               | mafll             | MAFA     | 3.36  | 0.55  |
| AB022286  | Kreisel (mouse) maf-related leucine zipper homolog 2.2                                                                                                 | kreml2.2          | MAFB     | -0.09 | 2.03  |
| AB006323  | V-maf musculoaponeurotic fibrosarcoma (avian) oncogene homolog                                                                                         | maf               | MAFB     | 2.40  | 4.79  |
| AW058804  | Membrane associated guanylate kinase, WW and PDZ domain containing 1                                                                                   | magi1             | MAG1     | 1.34  | 2.21  |
| BE201746  | Sim to mal, T-cell differentiation protein                                                                                                             | BE201746          | MAL      | -3.19 | -3.01 |
| AI397375  | Intron of wu:ff20e02 sim to MAN1A2   mannosidase, alpha, class 1A, member 2                                                                            | AI397375          | MAN1A2   | 1.55  | 1.20  |
| AL722241  | Sim to microtubule-associated protein 1B                                                                                                               | LOC100151220      | MAPIB    | 2.01  | 0.90  |
| BC066441  | Mitogen-activated protein kinase kinase 12                                                                                                             | map3k12           | MAP3K12  | 1.96  | -3.40 |
| BM182366  | Very weak sim to MAP9   microtubule-associated protein 9                                                                                               | si:ch73-34b5.1    | MAP9     | -0.50 | -2.01 |
| BI839722  | Mitogen-activated protein kinase 1                                                                                                                     | mapk1             | MAPK1    | 2.13  | 2.18  |
| BI879418  | Intron of mapk10   mitogen-activated protein kinase 10                                                                                                 | BI879418          | MAPK10   | 1.95  | -2.45 |
| BC095227  | Mitogen-activated protein kinase 15                                                                                                                    | mapk15            | MAPK15   | -1.85 | -3.08 |
| AB030902  | Mitogen-activated protein kinase 3                                                                                                                     | mapk3             | MAPK3    | 2.31  | 2.64  |
| AB030900  | Mitogen-activated protein kinase 8                                                                                                                     | mapk8             | MAPK8    | 2.09  | 3.91  |
| BG302813  | Mitogen-activated protein kinase-activated protein kinase 2a                                                                                           | mapkapk2a         | MAPKAPK2 | 2.10  | 2.35  |
| AW175189  | Microtubule-associated protein, RP/EB family, member 1, like                                                                                           | mapre1l           | MAPRE1   | 0.69  | 2.67  |
| AW826304  | Intergenic 3' to LOC564520 weak sim to KIAA1267 and 3' to LOC10000342: sim to MAPT: microtubule-associated protein tau                                 | AW826304          | MAPT     | 2.93  | -0.44 |
| AI626282  | 3' end of mark2   MAP/microtubule affinity-regulating kinase 2 and 3' to rcor2   REST corepressor 2                                                    | wu:fe49e05        | MARK2    | -2.25 | 0.28  |
| BI326616  | Mannan-binding lectin serine peptidase 2                                                                                                               | masp2             | MASP2    | 4.62  | 2.66  |
| AI959308  | Methionine adenosyltransferase 1, alpha                                                                                                                | mat1a             | MAT1A    | 4.05  | 4.15  |
| BM154034  | Myoglobin                                                                                                                                              | mb                | MB       | -2.56 | -0.27 |
| BM036795  | Methyl-CpG binding domain protein 3a                                                                                                                   | mbd3a             | MBD3     | 2.36  | 0.29  |

|           |                                                                                                                                                                        |                    |          |       |       |
|-----------|------------------------------------------------------------------------------------------------------------------------------------------------------------------------|--------------------|----------|-------|-------|
| AF227738  | Hexose-binding lectin 3                                                                                                                                                | hbl3               | MBL2     | -1.23 | -3.47 |
| BI533325  | Sim to Myelin basic protein                                                                                                                                            | sb.cb183           | MBP      | -3.29 | -1.60 |
| CK705161  | Melanoma cell adhesion molecule b                                                                                                                                      | mcamb              | MCAM     | 2.32  | 1.26  |
| BI864114  | Intergenic 3' to LOC100151023 weak sim to MCF2L   MCF.2 cell line derived transforming sequence-like and 5' to ect2   epithelial cell transforming sequence 2 oncogene | BI864114           | MCF2L    | 3.53  | 3.85  |
| AW115626  | MCM2 minichromosome maintenance deficient 2, mitotin (S. cerevisiae)                                                                                                   | mem2               | MCM2     | 2.35  | 2.32  |
| BI889166  | Minichromosome maintenance complex component 3                                                                                                                         | mem3               | MCM3     | 1.71  | 3.04  |
| AW115871  | MCM3 minichromosome maintenance deficient 3 (S. cerevisiae), like                                                                                                      | mem3l              | MCM3     | 0.63  | 4.88  |
| AW174245  | MCM4 minichromosome maintenance deficient 4, mitotin (S. cerevisiae)                                                                                                   | mem4               | MCM4     | 0.55  | 3.70  |
| AW058902  | MCM5 minichromosome maintenance deficient 5 (S. cerevisiae)                                                                                                            | mem5               | MCM5     | 3.09  | 2.95  |
| AI883326  | MCM6 minichromosome maintenance deficient 6, mitotin (S. cerevisiae)                                                                                                   | mcm6               | MCM6     | -0.23 | 3.69  |
| AW777430  | MCM7 minichromosome maintenance deficient 7 (S. cerevisiae)                                                                                                            | mcm7               | MCM7     | -0.87 | 3.74  |
| BC044140  | Mucolin2                                                                                                                                                               | mcoln2             | MCOLN2   | 1.41  | 2.41  |
| BC091973  | LOC541484 sim to MyoD family inhibitor domain containing                                                                                                               | zgc:113363         | MDFIC    | 3.33  | 0.43  |
| BE605537  | Malate dehydrogenase 1a, NAD (soluble)                                                                                                                                 | mdh1a              | MDH1     | -0.39 | -1.68 |
| AW826477  | Malate dehydrogenase 1b, NAD (soluble)                                                                                                                                 | mdh1b              | MDH1     | -1.32 | -2.81 |
| BG305824  | Mitochondrial malate dehydrogenase                                                                                                                                     | zgc:64133          | MDH2     | -1.62 | -1.35 |
| AF149802  | Midkine-related growth factor                                                                                                                                          | mdka               | MDK      | -0.36 | 3.89  |
| AF010255  | Transformed 3T3 cell double minute 2 homolog                                                                                                                           | mdm2               | MDM2     | 5.66  | 3.07  |
| BI881716  | Transformed 3T3 cell double minute 4 homolog                                                                                                                           | BI881716           | MDM4     | 1.17  | 2.29  |
| CV486371  | Mediator complex subunit 29                                                                                                                                            | med29              | MED29    | -0.41 | -2.79 |
| BI981180  | Thyroid hormone receptor associated protein 6                                                                                                                          | thrap6             | MED30    | 0.65  | 2.68  |
| AW165313  | Sim to mediator complex subunit 7                                                                                                                                      | AW165313           | MED7     | -2.21 | -1.74 |
| U66568    | Myocyte enhancer factor 2a                                                                                                                                             | mef2a              | MEF2A    | -1.14 | 2.53  |
| U66569    | Myocyte enhancer factor 2ca                                                                                                                                            | mef2ca             | MEF2C    | 0.88  | 2.27  |
| AI588147  | Intergenic 3' to mef2d   myocyte enhancer factor 2d and 3' to nes nestin                                                                                               | AI588147           | MEF2D    | -1.66 | -1.04 |
| AW128332  | Maternal embryonic leucine zipper kinase                                                                                                                               | melk               | MELK     | 0.85  | 4.32  |
| AB055680  | Met proto-oncogene (hepatocyte growth factor receptor)                                                                                                                 | met                | MET      | 2.47  | 3.82  |
| AW231999  | Sim to microfibrillar-associated protein 4                                                                                                                             | LOC555289          | MFAP4    | -3.12 | -0.80 |
| BF171537  | Microfibrillar-associated protein 4                                                                                                                                    | mfap4              | MFAP4    | -2.77 | -2.96 |
| AI544976  | Major facilitator superfamily domain containing 2ab                                                                                                                    | mfsd2ab            | MFS2A    | 1.12  | 2.17  |
| AW1165058 | MAX gene associated                                                                                                                                                    | mga                | MGA      | 2.22  | 0.90  |
| AW115530  | Similar to maltase-glucoamylase                                                                                                                                        | LOC100148922       | MGAM     | -2.45 | -3.78 |
| BC074045  | Mannosyl (alpha-1,3)-glycoprotein beta-1,4-N-acetylglucosaminyltransferase, isozyme B                                                                                  | mgat4b             | MGAT4B   | 2.30  | 2.69  |
| BI864451  | LOC777616 sim to mannosyl (alpha-1,3)-glycoprotein beta-1,4-N-acetylglucosaminyltransferase, isozyme B                                                                 | zgc:154054         | MGAT4B   | -1.18 | -2.17 |
| AI957809  | 3' end of zgc:101663   alpha-1,3-mannosyl-glycoprotein 4-beta-N-acetylglucosaminyltransferase C and 5' to LOC100001596   similar to thyrotropin beta subunit           | wu:fd06c04         | MGAT4C   | -0.30 | -2.26 |
| BI883744  | Sim to MGAT5   mannosyl (alpha-1,6)-glycoprotein beta-1,6-N-acetylglucosaminyltransferase                                                                              | zgc:136939         | MGAT5    | 3.44  | -0.34 |
| AI667631  | Sim to meningioma expressed antigen 5 (hyaluronidase)                                                                                                                  | LOC571547          | MGEA5    | -1.93 | -1.78 |
| BI880123  | Matrix Gla protein                                                                                                                                                     | mgp                | MGP      | -3.26 | -1.70 |
| BC074022  | LOC431762 sim to microsomal glutathione S-transferase 1                                                                                                                | zgc:92357          | MGST1    | 2.87  | 0.53  |
| BI983132  | Flavoprotein oxidoreductase MICAL3                                                                                                                                     | mical3             | MICAL3   | -2.08 | 2.67  |
| U27121    | Gastrulation specific protein (Mid1 interacting protein 1)                                                                                                             | gl2                | MID1IP1  | -4.45 | -1.56 |
| BC093343  | MID1 interacting protein 1                                                                                                                                             | mid1ip1            | MID1IP1  | -1.89 | -4.36 |
| DQ003080  | Major intrinsic protein of lens fiber 2                                                                                                                                | mip2               | MIP      | -0.97 | -2.82 |
| BI705604  | MAP kinase interacting serine/threonine kinase 1                                                                                                                       | mknk1              | MKNK1    | 0.56  | -1.53 |
| BI839784  | MAP kinase-interacting serine/threonine kinase 2b                                                                                                                      | mknk2b             | MKNK2    | 1.11  | 3.35  |
| BI888915  | Myeloid/lymphoid or mixed-lineage leukemia (trithorax homolog, Drosophila); translocated to, 10                                                                        | mlt10              | MLL10    | -1.98 | -0.83 |
| AW305943  | Matrix metalloproteinase 13                                                                                                                                            | mmp13              | MMP13    | -1.13 | -1.58 |
| BM081219  | Matrix metalloproteinase 14 (membrane-inserted) alpha                                                                                                                  | mmp14a             | MMP14    | 1.93  | 2.09  |
| BM182277  | Matrix metalloproteinase 2                                                                                                                                             | mmp2               | MMP2     | -3.26 | -0.29 |
| BI156872  | MOB1, Mps One Binder kinase activator-like 1A (yeast)                                                                                                                  | mobbk1a            | MOBK1A   | 1.29  | 2.20  |
| BI475827  | 3' end of mocs1   molybdenum cofactor synthesis step-1 and 5' to insm1b insulinoma-associated 1b                                                                       | BI475827           | MOCS1    | -2.70 | -1.40 |
| AB032727  | V-mos Moloney murine sarcoma viral oncogene homolog                                                                                                                    | mos                | MOS      | -3.32 | -5.36 |
| BC081598  | Mannose-6-phosphate utilization defect 1a                                                                                                                              | mpdu1a             | MPPDU1   | 2.67  | 1.81  |
| BI883872  | LOC445224 sim to M-phase phosphoprotein 6                                                                                                                              | zgc:100960         | MPHOSPH6 | -0.91 | -1.68 |
| BM154669  | Sim to myosin phosphatase Rho interacting protein                                                                                                                      | im:7154419         | MPRIP    | 1.65  | 2.05  |
| BC055143  | MpV17 transgene, murine homolog, glomerulosclerosis                                                                                                                    | mpv17              | MPV17    | -2.99 | -0.32 |
| Z46777    | Major histocompatibility complex class I UBA gene                                                                                                                      | mhc1uba            | MR1      | -5.11 | -2.69 |
| AI477589  | Major histocompatibility complex class I UEA gene                                                                                                                      | mhc1uea            | MR1      | -3.66 | -2.78 |
| AF137534  | Major histocompatibility complex class I UFA gene                                                                                                                      | mhc1ufa            | MR1      | -3.46 | -2.51 |
| BC056726  | Major histocompatibility complex class I UXA2 gene                                                                                                                     | mhc1uxa2           | MR1      | -1.43 | -3.64 |
| BC053202  | Meiotic recombination 11 homolog A (S. cerevisiae)                                                                                                                     | nre11a             | MRE11A   | 1.85  | -0.28 |
| BC049041  | Mitochondrial ribosomal protein L14                                                                                                                                    | mrpl14             | MRPL14   | -0.41 | -2.20 |
| AI601311  | Mitochondrial ribosomal protein L15                                                                                                                                    | mrpl15             | MRPL15   | -1.40 | -2.61 |
| CD605616  | Sim to mitochondrial ribosomal protein S31                                                                                                                             | si:ch211-114c1.2.1 | MRPS31   | -2.45 | -1.78 |
| AF412833  | MutS homolog 2 (E. coli) (mutS homolog 2, colon cancer, nonpolyposis type 1)                                                                                           | msh2               | MSH2     | 2.36  | -2.26 |
| AF412834  | MutS homolog 6 (E. coli)                                                                                                                                               | msh6               | MSH6     | 2.15  | 0.41  |
| AW076848  | LOC573213 sim to mesothelin                                                                                                                                            | LOC573213          | MSLN     | -2.22 | -2.50 |
| CV485301  | Sim to MSRA   methionine sulfoxide reductase A                                                                                                                         | im:7149628         | MSRA     | -0.70 | 2.26  |
| AF370035  | Macrophage stimulating 1 (hepatocyte growth factor-like)                                                                                                               | mst1               | MST1     | 2.23  | -3.01 |
| U16310    | Muscle segment homeobox A                                                                                                                                              | mxsa               | MSX2     | 3.23  | -1.35 |
| AW567292  | Muscle segment homeobox C                                                                                                                                              | mxsc               | MSX2     | -1.79 | -1.80 |
| AW115744  | Metastasis associated family, member 3                                                                                                                                 | mta3               | MTA3     | 1.60  | -1.23 |
| AF458116  | Metal-regulatory transcription factor 1                                                                                                                                | mtf1               | MTF1     | 2.49  | 0.60  |
| BG303602  | Methylenetetrahydrofolate dehydrogenase (NADP+ dependent)                                                                                                              | mthfd1             | MTHFD1   | 4.10  | 1.55  |
| AW422831  | Sim to MTRR   5-methyltetrahydrofolate-homocysteine methyltransferase reductase                                                                                        | LOC560667          | MTRR     | -1.52 | 1.29  |
| AI974191  | LOC692303 sim to microsomal triglyceride transfer protein                                                                                                              | zgc:136353         | MTPP     | 3.74  | 0.94  |
| AI626485  | 3' end of LOC100150694   similar to platelet-derived growth factor or 3' of LOC100150536 sim to MTUS1   microtubule associated tumor suppressor 1                      | AI626485           | MTUS1    | -2.27 | 2.27  |
| AW175351  | Sim to mucin 2, oligomeric mucus/gel-forming                                                                                                                           | LOC572172          | MUC2     | -3.40 | -1.83 |
| BI672148  | LOC572175 weak sim to mucin 2, oligomeric mucus/gel-forming                                                                                                            | LOC572175          | MUC2     | -2.45 | -1.68 |
| AI641080  | 3' end of murc   muscle-related coiled-coil protein or 3' end of LOC571423 sim to DNAH5   dynein, axonemal, heavy chain 5                                              | AI641080           | MURC     | -1.04 | -1.72 |
| AW184499  | Major vault protein                                                                                                                                                    | mvp                | MVP      | 2.02  | -2.67 |
| AW421176  | Intron of mxc   myxovirus (influenza virus) resistance C                                                                                                               | AW421176           | MX1      | 1.53  | -1.00 |
| BM181722  | MAX dimerization protein 3                                                                                                                                             | max3               | MXD3     | 0.22  | -3.36 |
| BG884411  | Transcription factor cmyb                                                                                                                                              | LOC100000853       | MYB      | -2.38 | -0.75 |
| BC085629  | Myosin binding protein C, slow type                                                                                                                                    | mybpc1             | MYBPC1   | -1.65 | -2.62 |
| BC074055  | LOC393530 sim to myosin binding protein C, slow type                                                                                                                   | zgc:66097          | MYBPC1   | -2.18 | -2.46 |
| AI794621  | LOC541384 sim to myosin binding protein C, fast type                                                                                                                   | zgc:110761         | MYBPC2   | -3.54 | -2.53 |
| BM104128  | LOC692317 sim to myosin binding protein C, fast type                                                                                                                   | zgc:136545         | MYBPC2   | 1.60  | -1.50 |
| AW454173  | Myosin binding protein C, cardiac                                                                                                                                      | mybpc3             | MYBPC3   | -1.73 | -1.71 |
| BM103298  | MYC binding protein 2, esrom                                                                                                                                           | mycbp2             | MYCBP2   | 0.47  | 2.33  |
| AW115849  | V-myc myelocytomatosis viral oncogene homolog 1, lung carcinoma derived (avian) b                                                                                      | mycl1b             | MYCL1    | 2.88  | 2.43  |
| AI721479  | V-myc myelocytomatosis viral related oncogene, neuroblastoma derived (avian)                                                                                           | mycn               | MYCN     | -1.22 | -2.51 |
| BI890420  | Myelin expression factor 2                                                                                                                                             | myef2              | MYEF2    | 3.50  | 0.61  |
| BI886767  | Myosin, heavy polypeptide 10, non-muscle                                                                                                                               | myh10              | MYH10    | 2.12  | 1.57  |
| AF180893  | Myosin, heavy polypeptide 1, skeletal muscle                                                                                                                           | myh2               | MYH2     | -4.62 | -0.57 |
| AW343155  | LOC100002040                                                                                                                                                           | LOC100002040       | MYH4     | -2.50 | -2.36 |
| AY921650  | Myosin heavy chain 4                                                                                                                                                   | myhc4              | MYH4     | -5.29 | -2.21 |
| AF165817  | Myosin, heavy polypeptide 2, fast muscle specific                                                                                                                      | myh2               | MYH2     | -6.63 | -0.76 |
| BF158199  | LOC100008376 sim to myosin, heavy chain 4, skeletal muscle                                                                                                             | wu:fd14a01         | MYH4     | -4.02 | -1.70 |
| BM095209  | Sim to myosin, heavy chain 6, cardiac muscle, alpha (cardiomyopathy, hypertrophic 1)                                                                                   | BM095209           | MYH6     | -3.67 | -1.40 |
| BC096949  | Ventricular myosin heavy chain                                                                                                                                         | vmhc               | MYH7     | 3.63  | 0.58  |
| AW281681  | LOC336165 sim to myosin, light chain 1, alkali; skeletal, fast                                                                                                         | zgc:77231          | MYL1     | -3.80 | -1.79 |

|          |                                                                                                                                                                                                                |                   |          |       |       |
|----------|----------------------------------------------------------------------------------------------------------------------------------------------------------------------------------------------------------------|-------------------|----------|-------|-------|
| BG985673 | Myosin light chain 2 like                                                                                                                                                                                      | zgc:110679        | MYL2     | -4.01 | -2.18 |
| AF114428 | Myosin, light polypeptide 7, regulatory                                                                                                                                                                        | myl7              | MYL7     | -4.62 | -2.06 |
| AI626776 | Myosin, light polypeptide 9, regulatory                                                                                                                                                                        | myl9              | MYL9     | -2.25 | 0.72  |
| BM181653 | Myosin regulatory light chain interacting protein                                                                                                                                                              | mylip             | MYLIP    | -3.67 | -3.41 |
| AI106316 | 3' end of mylk4: myosin light chain kinase family, member 4 and 5' to gmds: GDP-mannose 4,6-dehydratase                                                                                                        | AI106316          | MYLK4    | 0.84  | -1.86 |
| AI477343 | Myosin XVIII-like 1                                                                                                                                                                                            | myo1811           | MYO18A   | 0.09  | 1.72  |
| AW058877 | Myosin IE                                                                                                                                                                                                      | myo1e             | MYO1E    | -1.63 | 0.45  |
| BI867099 | LOC395609 sim to myosin IE                                                                                                                                                                                     | zgc:64042         | MYO1E    | -2.17 | -1.81 |
| AA495066 | 3' end of LOC573741   similar to myoskeleton and 3' to zgc:101640 phosphatidylinositol transfer protein, cytoplasmic 1                                                                                         | wu:fa05e12        | MYOCD    | -2.59 | -1.52 |
| BC065451 | Myozenin 1                                                                                                                                                                                                     | zgc:77785         | MYOZ1    | -2.11 | -2.32 |
| BC085365 | LOC492779 sim to N-acetylneuraminic acid synthase (sialic acid synthase)                                                                                                                                       | zgc:101549        | NANS     | -1.01 | -2.75 |
| BI877937 | NMDA receptor-regulated gene 1a                                                                                                                                                                                | narg1a            | NARG1    | 3.20  | -1.11 |
| BI880972 | NMDA receptor-regulated gene 1b                                                                                                                                                                                | narg1b            | NARG1    | 2.98  | -0.49 |
| AL716141 | 3' end of zgc:162648 (sim to NAT8L: N-acetyltransferase 8-like (GCN5-related, putative) and 3' end to poln: DNA polymerase nu                                                                                  | wu:fb94h12        | NAT8L    | -1.47 | -2.98 |
| BI888811 | Nibrin                                                                                                                                                                                                         | zgc:194152        | NBN      | 2.15  | 2.05  |
| BI880074 | Intergenic 3' to ncaml   neural cell adhesion molecule 1 and 5' to zbtb16   zinc finger and BTB domain containing 16                                                                                           | BI880074          | NCAM1    | -2.26 | -1.72 |
| AY029402 | Neural cell adhesion molecule 1                                                                                                                                                                                | ncam1             | NCAM1    | -1.09 | 2.91  |
| AY029401 | Neural cell adhesion molecule 3                                                                                                                                                                                | ncam3             | NCAM1    | 0.29  | 1.94  |
| BI705634 | Neural cell adhesion molecule 2                                                                                                                                                                                | zgc:152904        | NCAM2    | 0.77  | -1.98 |
| BI879542 | Neutrophil cytosolic factor 1                                                                                                                                                                                  | ncf1              | NCF1     | -1.05 | -2.79 |
| BI889900 | Sim to NCK interacting protein with SH3 domain                                                                                                                                                                 | BI889900          | NCKIPSD  | 0.74  | 1.92  |
| AI601734 | Intron of sich211-216123.2; LOC565061 weak sim to nuclear receptor coactivator 5                                                                                                                               | AI601734          | NCOA5    | 0.64  | 1.67  |
| AW171396 | Intergenic 3' to LOC5646645' to ncoa6: nuclear receptor coactivator 6                                                                                                                                          | wu:fi41a10        | NCOA6    | -2.03 | -1.86 |
| BG305349 | Nuclear receptor co-repressor 1                                                                                                                                                                                | ncor1             | NCOR1    | -0.44 | 1.55  |
| BC055168 | Neuronal calcium sensor 1a                                                                                                                                                                                     | ncs1a             | NCS1     | 5.37  | 0.22  |
| AY751744 | Nicastrin                                                                                                                                                                                                      | ncstn             | NCSTN    | 3.28  | 0.98  |
| AI722423 | Kinetochore associated 2-like                                                                                                                                                                                  | kntc2l            | NDC80    | 2.42  | 0.33  |
| BI840930 | Nedd4 family interacting protein 1                                                                                                                                                                             | ndfip1            | NDFIP1   | 3.71  | 0.68  |
| BE202095 | Necdin-like 2                                                                                                                                                                                                  | ndnl2             | NDNL2    | 1.50  | 0.45  |
| BM184118 | NADPH dependent diflavin oxidoreductase 1                                                                                                                                                                      | ndor1             | NDOR1    | 4.53  | -0.61 |
| BI880439 | Intron of N-myc downstream regulated family member 3b                                                                                                                                                          | BI880439          | NDRG3    | 3.54  | 3.12  |
| BM182832 | N-myc downstream regulated family member 3a                                                                                                                                                                    | ndrg3a            | NDRG3    | -1.74 | 2.84  |
| BM185338 | N-myc downstream regulated family member 3b                                                                                                                                                                    | ndrg3b            | NDRG3    | -0.96 | 2.40  |
| BI840924 | Sim to NADH dehydrogenase (ubiquinone) 1 alpha subcomplex, 4, 9kDa                                                                                                                                             | wu:fa55f06        | NDUFA4   | -1.71 | -4.04 |
| AI884287 | NADH dehydrogenase (ubiquinone) flavoprotein 1                                                                                                                                                                 | ndufv1            | NDUFA4   | -1.57 | -1.30 |
| BC095287 | LOC55536 sim to NECAP endocytosis associated 2                                                                                                                                                                 | zgc:110468        | NECAP2   | -2.78 | 0.55  |
| BG729199 | Neural precursor cell expressed, developmentally down-regulated 8                                                                                                                                              | nedd8l            | NEEDD8   | 1.75  | 1.33  |
| BC095779 | LOC553718 sim to neurofilament, medium polypeptide                                                                                                                                                             | zgc:112359        | NEFM     | -1.84 | -0.96 |
| AI477081 | Intergenic 3' to negr1   neuronal growth regulator 1 and 5' to zranb2 zinc finger, RAN-binding domain containing 2                                                                                             | wu:fb55d11        | NEGR1    | 2.37  | 0.77  |
| BM184173 | NIMA (never in mitosis gene a)-related kinase 2                                                                                                                                                                | nek2              | NEK2     | 1.75  | -3.62 |
| BC090546 | Neuron derived neurotrophic factor                                                                                                                                                                             | nenf              | NENF     | 2.90  | 0.76  |
| AI667315 | Neogenin 1                                                                                                                                                                                                     | neo1              | NEO1     | -2.42 | -0.19 |
| BM025913 | Nuclear factor of activated T-cells, cytoplasmic, calcineurin-dependent 2 interacting protein                                                                                                                  | nfatc2ip          | NFATC2IP | -3.26 | 0.22  |
| BI845682 | Intron of nfia   nuclear factor I/A                                                                                                                                                                            | BI845682          | NFIA     | 1.43  | 2.64  |
| BC080210 | Nuclear factor, interleukin 3 regulated                                                                                                                                                                        | nfil3             | NFIL3    | 3.16  | 0.48  |
| BM026051 | Sim to nuclear factor, interleukin 3 regulated                                                                                                                                                                 | si:dkey-52h23.1   | NFIL3    | 2.54  | 1.03  |
| AI397155 | 3' end of LOC10000812 sim to NFIL3   nuclear factor, interleukin 3 regulated and 5' to DKEY-172019.3                                                                                                           | wu:fb15g03        | NFIL3    | -1.74 | -0.40 |
| BM102747 | Nuclear factor of kappa light polypeptide gene enhancer in B-cells 2, p49/p100                                                                                                                                 | nfkb2             | NFKB2    | 2.32  | 2.06  |
| AW232219 | Nuclear factor of kappa light polypeptide gene enhancer in B-cells inhibitor, alpha a 3 end of zgc:92567: nuclear transcription factor Y, alpha like and 5' to ahey11: S-adenosylhomocysteine hydrolase-like 1 | nfkb2a            | NFKBIA   | 1.68  | 0.38  |
| AA495045 | NHP2 ribonucleoprotein homolog                                                                                                                                                                                 | AA495045          | NFYA     | 6.56  | 1.74  |
| AI884272 | Nidogen 1a                                                                                                                                                                                                     | nhp2              | NHP2     | -0.93 | -2.12 |
| AW019573 | LOC450042 sim to non imprinted in Prader-Willi/Angelman syndrome 1                                                                                                                                             | nid1a             | NID1     | 4.04  | 1.15  |
| BC083262 | Ichthyin sim to NIPA-like domain containing 4                                                                                                                                                                  | nipal1            | NIPAL1   | 2.22  | 1.16  |
| AW594957 | Natural killer-tumor recognition sequence                                                                                                                                                                      | zgc:91960         | NIPAL4   | 3.19  | 2.19  |
| AI957936 | Posterior neuron-specific homeobox                                                                                                                                                                             | nkr               | NKTR     | 2.00  | 3.54  |
| AB067731 | NK2 homeobox 1b                                                                                                                                                                                                | pnx               | NKX1-2   | -3.14 | -1.55 |
| AF321112 | NK2 homeobox 1a                                                                                                                                                                                                | nkx2.1b           | NKX2-1   | 3.76  | -0.18 |
| AF253054 | NK2 transcription factor related 5                                                                                                                                                                             | nkx2.1a           | NKX2-4   | 1.12  | 2.45  |
| U66572   | LOC555375 sim to NK3 homeobox 1                                                                                                                                                                                | nkx2.5            | NKX2-5   | 2.88  | 0.60  |
| BI842967 | NK3 homeobox 2                                                                                                                                                                                                 | LOC555375         | NKX3-1   | -2.13 | -1.93 |
| AY225416 | NK6 transcription factor related, locus 1                                                                                                                                                                      | nkx3.2            | NKX3-2   | -0.56 | -3.87 |
| BC076337 | Sim to neuroigin 4, X-linked                                                                                                                                                                                   | nkx6.1            | NKX6-1   | 1.06  | 2.42  |
| BI879886 | Nemo like kinase b                                                                                                                                                                                             | LOC561122         | NLGN4X   | -1.39 | -1.58 |
| BG304985 | Weak sim to NLRP12   NLR family, pyrin domain containing 12                                                                                                                                                    | nlk1              | NLK      | 2.16  | 2.35  |
| BM026055 | Non-metastatic cells 2, protein (NM23B) expressed in                                                                                                                                                           | si:ch211-278p.94  | NLRP12   | -1.55 | -0.50 |
| AF201764 | Non-metastatic cells 4, protein expressed in                                                                                                                                                                   | nme2              | NME2     | 2.54  | 1.55  |
| BM181863 | LOC436789 sim to non-metastatic cells 5, protein expressed in (nucleoside-diphosphate kinase)                                                                                                                  | nme4              | NME4     | 1.64  | 4.01  |
| BI672359 | LOC792676 weak sim to N-myc (and STAT) interactor                                                                                                                                                              | zgc:92812         | NME5     | -1.73 | -1.77 |
| AW076762 | 3' end of nmnat2   nicotinamide nucleotide adenylyltransferase 2 and 3' to DKEY-161L11.81 sim to LAMC2   laminin, gamma 2                                                                                      | nmi               | NMI      | 1.99  | -0.16 |
| AW232713 | Sim to NIN1/RPN12 binding protein 1 homolog (S. cerevisiae)                                                                                                                                                    | wu:jj24h11        | MNAT2    | 1.54  | 2.70  |
| BI889170 | Nodal-related 1                                                                                                                                                                                                | wu:fc27e05        | NOB1     | 1.97  | 2.00  |
| AF056327 | Nodal-related 2; cyclop                                                                                                                                                                                        | ndr1              | NODAL    | 2.55  | 1.67  |
| AF159147 | Noggin 1                                                                                                                                                                                                       | ndr2              | NODAL    | 3.11  | 0.67  |
| BM034958 | LOC613021 sim to nucleolar protein 8                                                                                                                                                                           | nog1              | NOG      | 4.83  | 4.48  |
| BI430378 | Nitric oxide synthase 2a, inducible                                                                                                                                                                            | si:ch211-103f16.2 | NOL8     | -1.10 | -2.35 |
| BI846489 | Intergenic 5' UTR of notch1   notch homolog, like and 5' to LOC569402 sim to TAP1   transporter 1, ATP-binding cassette, sub-family B (MDR/TAP)                                                                | nos2a             | NOS2     | -2.45 | -0.79 |
| X69088   | Notch homolog 1a                                                                                                                                                                                               | BI846489          | NOTCH1   | 1.78  | 2.14  |
| U57973   | Notch homolog 1b                                                                                                                                                                                               | notch1a           | NOTCH1   | 0.64  | -1.79 |
| Y10354   | Notch homolog 2                                                                                                                                                                                                | notch1b           | NOTCH1   | 1.87  | 1.87  |
| BE201310 | LOC100002182 sim to Notch homolog 2                                                                                                                                                                            | notch2            | NOTCH2   | -2.01 | 1.53  |
| U57975   | Notch homolog 3 (more sim to NOTCH2)                                                                                                                                                                           | LOC100002182      | NOTCH2   | 4.75  | 4.33  |
| AI942978 | N-acetylneuraminic pyruvate lyase (dihydrodipicolinate synthase)                                                                                                                                               | notch3            | NOTCH3   | 0.18  | 1.84  |
| BI46714  | Nuclear protein localization 4 homolog (S. cerevisiae)                                                                                                                                                         | npl               | NPL      | 1.77  | 2.32  |
| BI890458 | LOC553507 sim to nucleophosmin (nucleolar phosphoprotein B23, numatrin)                                                                                                                                        | nploc4            | NPLC4    | -2.86 | 0.70  |
| BG307975 | Sim to neuroligin 4                                                                                                                                                                                            | LOC553507         | NPM1     | 2.63  | 1.79  |
| BI892036 | Nuclear receptor subfamily 0, group B, member 2a                                                                                                                                                               | BG307975          | NPTN     | 1.50  | -0.55 |
| CD605447 | Nuclear receptor subfamily 1, group D, member 1                                                                                                                                                                | nr0b2a            | NR0B2    | -1.54 | -2.65 |
| AF342941 | Nuclear receptor subfamily 1, group D, member 2                                                                                                                                                                | nr1d1             | NR1D1    | -1.64 | -2.96 |
| BG308431 | Nuclear receptor subfamily 1, group D, member 2b                                                                                                                                                               | nr1d2a            | NR1D2    | -0.62 | 3.45  |
| AW826882 | Sim to nuclear receptor subfamily 2, group E, member 3                                                                                                                                                         | nr1d2b            | NR1D2    | -2.44 | 1.03  |
| X70299   | Nuclear receptor subfamily 2, group F, member 1                                                                                                                                                                | zgc:103631        | NR2E3    | -1.01 | -1.50 |
| BI706217 | Intergenic 5' to zgc:92034: sim to ARDC3: arrestin domain containing 3 and 5' to nr2f1b: nuclear receptor subfamily 2, group F, member 1b                                                                      | nr2f1             | NR2F1    | 0.32  | 2.28  |
| S80986   | Nuclear receptor subfamily 2, group F, member 2                                                                                                                                                                | BI706217          | NR2F2    | 1.54  | 0.99  |
| I93458   | Nuclear receptor subfamily 2, group F, member 5                                                                                                                                                                | nr2f2             | NR2F2    | 1.40  | 2.45  |
| AF014926 | Neuroblastoma RAS viral (v-ras) oncogene homolog                                                                                                                                                               | nr2f5             | NR2F2    | 3.09  | 1.07  |
| U62619   | Neurexin 2a                                                                                                                                                                                                    | nr5a2             | NRS2     | 2.45  | 4.82  |
| BG985738 | Neurexin 2b                                                                                                                                                                                                    | nras              | NRAS     | -2.64 | -0.55 |
| BI476369 | 5'-nucleotidase, cytosolic III                                                                                                                                                                                 | nrp2b             | NRP2     | -2.09 | 1.56  |
| AI793467 |                                                                                                                                                                                                                | nrxa2a            | NRXA2    | 1.76  | 0.44  |
|          |                                                                                                                                                                                                                | zgc:66117         | NTSC3    | -1.91 | -0.81 |

|              |                                                                                                                                                                                                       |                 |          |       |       |
|--------------|-------------------------------------------------------------------------------------------------------------------------------------------------------------------------------------------------------|-----------------|----------|-------|-------|
| AW343382     | 5'-nucleotidase, ecto (CD73)                                                                                                                                                                          | nt5e            | NTESE    | -2.63 | -0.89 |
| AF002717     | Netrin 1a                                                                                                                                                                                             | ntn1a           | NTN1     | 1.16  | 1.92  |
| AW077469     | Intergenic 3' to si:ch211-220b11.1 sim to NTRK2   neurotrophic tyrosine kinase, receptor, type 2 and 3' to kcm1l potassium channel modulatory factor 1                                                | AW077469        | NTRK2    | -2.19 | -0.53 |
| BM187002     | 3' end of LOC561496 sim to NUAk1   NUAk family, SNF1-like kinase, 1 and 5' to LOC567795 weak sim to MUPCDH   mucin-like protocadherin                                                                 | BM187002        | NUAK1    | 2.22  | 0.93  |
| BC049486     | Nudix (nucleoside diphosphate linked moiety X)-type motif 1                                                                                                                                           | nudt1           | NUDT1    | -1.14 | -5.40 |
| AW420858     | Intergenic 3' to nud4   nudix (nucleoside diphosphate linked moiety X)-type motif 4 and 5' to CH211-204P6.5 sim to EEA1   early endosome antigen 1                                                    | wu:fj8a02       | NUDT4    | 3.08  | -0.97 |
| BI982971     | Nudix (nucleoside diphosphate linked moiety X)-type motif 9                                                                                                                                           | nudt9           | NUDT9    | -0.37 | -4.43 |
| AH477432     | Nucleoporin 107                                                                                                                                                                                       | nup107          | NUP107   | 2.43  | 1.66  |
| AW170971     | Nucleoporin 155                                                                                                                                                                                       | AW170971        | NUP155   | -3.29 | -0.73 |
| BI891507     | Nucleoporin-like 2                                                                                                                                                                                    | zgc:77724       | NUPL2    | 1.91  | -1.16 |
| BF717555     | Nuclear protein, transcriptional regulator, 1 (candidate of metastasis 1)                                                                                                                             | nupr1           | NUPR1    | 1.71  | 3.29  |
| BI979960     | 3' end of zgc:92136 nogo-B receptor precursor and 3' to LOC793494 similar to Na-K-Cl cotransporter                                                                                                    | BI979960        | NUS1     | 1.16  | 1.54  |
| BM184045     | Nucleolar and spindle associated protein 1                                                                                                                                                            | nusap1          | NUSAP1   | -0.46 | -5.20 |
| BM181739     | Similar to otoconin 90                                                                                                                                                                                | LOC793660       | OC90     | -1.50 | -1.69 |
| AW116260     | Occludin                                                                                                                                                                                              | ocln            | OCLN     | -2.55 | -0.80 |
| AI558633     | Sim to opioid growth factor receptor                                                                                                                                                                  | AI558633        | OGFR     | -2.85 | -3.03 |
| AW019131     | Sim to opioid growth factor receptor                                                                                                                                                                  | AW019131        | OGFR     | -3.11 | -2.89 |
| BM071771     | O-linked N-acetylglucosamine (GlcNAc) transferase (UDP-N-acetylglucosamine:polypeptide-N-acetylglucosaminyl transferase) 1                                                                            | ogt1            | OGT      | -3.07 | 0.62  |
| BF717452     | Weak sim to OLFM4   olfactomedin 4                                                                                                                                                                    | LOC569381       | OLFM4    | -2.17 | -3.46 |
| BG727373     | Sim to 5-oxoprolinase (ATP-hydrolysing)                                                                                                                                                               | LOC100151110    | OPLAH    | 3.19  | 1.32  |
| AF109371     | Opsin 1 (cone pigments), long-wave-sensitive, 1                                                                                                                                                       | opn1w1          | OPN1LW   | -3.28 | -0.52 |
| AB035276     | Vertebrate ancient long opsin a                                                                                                                                                                       | valopa          | OPN1LW   | 2.99  | 0.29  |
| BC076120     | Opsin 1 (cone pigments), long-wave-sensitive, 2                                                                                                                                                       | opn1w2          | OPN1MW   | -3.13 | -0.06 |
| AW059358     | Similar to multiple tissue opsin                                                                                                                                                                      | LOC100000053    | OPN3     | -1.60 | -1.70 |
| AJ001596     | Opioid receptor, delta 1                                                                                                                                                                              | opr1            | OPRD1    | -2.27 | 0.37  |
| AF285173     | Opioid receptor, kappa 1                                                                                                                                                                              | oprk1           | OPRK1    | 2.12  | 0.76  |
| AF012746     | Odorant receptor, family C, subfamily 103, member 5                                                                                                                                                   | or103-1         | OR2AT4   | 2.68  | -2.03 |
| BG303377     | Origin recognition complex, subunit 3-like (yeast)                                                                                                                                                    | orc3l           | ORC3L    | 4.12  | -1.03 |
| NM_212671    | Origin recognition complex, subunit 6 homolog-like (yeast)                                                                                                                                            | orc6l           | ORC6L    | -1.91 | -5.99 |
| BI865590     | Amplified in osteosarcoma                                                                                                                                                                             | os9             | OS9      | 1.53  | 1.38  |
| BM025945     | LOC100003104 weak sim to OSBP: oxysterol binding protein or intron of CNKSR2: connector enhancer of kinase suppressor of Ras 2 or 5' to wu:fa18f11 sim to C1orf198                                    | LOC100003104    | OSBP     | -1.14 | -1.70 |
| BM184075     | Oxysterol binding protein-like 7                                                                                                                                                                      | osbpl7          | OSBPL6   | -2.01 | -6.36 |
| AI959376     | LOC447807 weak sim to organic solute transporter alpha                                                                                                                                                | zgc:92111       | OSTalpha | 1.45  | 2.19  |
| AI641585     | LOC393239 sim to oligosaccharyltransferase complex subunit                                                                                                                                            | zgc:56559       | OSTC     | 2.07  | 1.33  |
| AF071496     | Orthopedia homolog b                                                                                                                                                                                  | otpb            | OTP      | -2.02 | -2.20 |
| UI4591       | Orthodenticle homolog 1                                                                                                                                                                               | otx1            | OTX1     | -4.44 | -4.50 |
| BI670964     | Cone-rod homeobox                                                                                                                                                                                     | crx             | OTX2     | -2.93 | -1.82 |
| UI4592       | Orthodenticle homolog 2                                                                                                                                                                               | otx2            | OTX2     | -0.96 | -2.78 |
| AW154676     | Sim to 3-oxoacid CoA transferase 1                                                                                                                                                                    | AW154676        | OXCT1    | 2.84  | 1.96  |
| AW280053     | 3-oxoacid CoA transferase 1a                                                                                                                                                                          | oxct1a          | OXCT1    | -4.50 | -2.05 |
| AF317643     | Purineric receptor P2X, ligand-gated ion channel, 4a                                                                                                                                                  | p2rx4a          | P2RX4    | -0.64 | -2.82 |
| AI477493     | Proliferation-associated 2G4, a                                                                                                                                                                       | pa2g4a          | PA2G4    | -0.48 | 2.03  |
| AI588301     | Proliferation-associated 2G4, b                                                                                                                                                                       | pa2g4b          | PA2G4    | 0.16  | 2.71  |
| BG891950     | Poly A binding protein, cytoplasmic 1 b                                                                                                                                                               | pabpc1b         | PABPC1   | 0.21  | -2.05 |
| AI964234     | Poly(A) binding protein, cytoplasmic 4 (inducible form)                                                                                                                                               | pabpc4          | PABPC4   | -0.70 | -3.19 |
| AW059111     | Protein kinase C and casein kinase substrate in neurons 1                                                                                                                                             | pacsin1         | PACSN1   | -1.59 | 1.24  |
| AI384268     | wu:fb12e09 weak sim to pleckstrin homology-like domain, family B, member 2 or 3' end of LOC100149252 weak sim to PAFAH1B2   platelet-activating factor acetylhydrolase, isoform 1b, subunit 2 (30kDa) | wu:fb12e09      | PAFAH1B2 | -1.92 | -2.12 |
| AW421213     | Phenylalanine hydroxylase                                                                                                                                                                             | pah             | PAH      | 3.15  | 6.15  |
| CD605405     | Sim to PAPP5   PAP associated domain containing 5                                                                                                                                                     | LOC568678       | PAPP5    | 1.80  | -0.89 |
| BI673488     | Poly(A) polymerase gamma                                                                                                                                                                              | papolg          | PAPOLG   | -1.36 | -2.13 |
| AI384140     | 3'-phosphoadenosine 5'-phosphosulfate synthase 2                                                                                                                                                      | paps2           | PAPSS2   | -0.25 | 4.41  |
| AI353121     | 3' end of si:dkcy-259k14.2 sim to PARG   poly (ADP-ribose) glycohydrolase and 3' to si:ch211-229p19.3 sim to OGDH   oxoglutarate (alpha-ketoglutarate) dehydrogenase (lipamide)                       | AI353121        | PARG     | 0.61  | -2.20 |
| NM_001002872 | Parvin, alpha a                                                                                                                                                                                       | parvaa          | PARVA    | 0.71  | 2.05  |
| BI708864     | Parvin, beta                                                                                                                                                                                          | parvb           | PARVB    | -0.34 | 1.86  |
| AF014366     | Paired box gene 3a                                                                                                                                                                                    | pax3a           | PAX3     | 1.31  | 3.44  |
| AF072548     | Paired box gene 5                                                                                                                                                                                     | pax5            | PAX5     | 0.30  | 2.06  |
| X63183       | Paired box gene 6a                                                                                                                                                                                    | pax6a           | PAX6     | 0.59  | 2.11  |
| AW420720     | Pyruvate carboxylase                                                                                                                                                                                  | pc              | PC       | 3.02  | 1.77  |
| BI896470     | 6-pyruvoyl-tetrahydropterin synthase/dimerization cofactor of hepatocyte nuclear factor 1 alpha (TCF1)                                                                                                | pcbd1           | PCBD1    | 2.70  | 2.82  |
| AF043902     | Protocadherin 10a                                                                                                                                                                                     | pcdh10a         | PCDH10   | 2.54  | 0.57  |
| AY772390     | Protocadherin 15a                                                                                                                                                                                     | pcdh15a         | PCDH15   | 2.34  | 2.17  |
| AY772391     | Protocadherin 15b                                                                                                                                                                                     | pcdh15b         | PCDH15   | 1.73  | 0.26  |
| AW232442     | 3' end of pcdh18b   protocadherin 18b                                                                                                                                                                 | wu:fj9f12       | PCDH18   | -0.55 | -1.70 |
| BI673679     | Intron of wu:fc83e05 sim to PCDH19: protocadherin 19                                                                                                                                                  | BI673679        | PCDH19   | -1.72 | -1.14 |
| AY576979     | Protocadherin 1 alpha 4                                                                                                                                                                               | pcdh1a4         | PCDH1A   | -2.19 | -0.66 |
| AB075940     | Protocadherin 2 alpha b 12                                                                                                                                                                            | pcdh2ab12       | PCDH2A   | -1.87 | -0.27 |
| BI866262     | 3' ed of pcdh2ac   protocadherin 2 alpha c and 5' to pcdh2g1   protocadherin 2 gamma 1                                                                                                                | BI866262        | PCDH2C   | -0.76 | -1.64 |
| AB075939     | LOC791897 sim to protocadherin alpha subfamily C, 2                                                                                                                                                   | pcdh2ab6        | PCDH2C2  | 0.39  | -2.49 |
| AY583022     | Protocadherin 2 gamma 10                                                                                                                                                                              | pcdh2g10        | PCDHGA10 | -2.01 | -2.92 |
| AY583051     | Protocadherin 2 gamma 3                                                                                                                                                                               | pcdh2g3         | PCDHGA10 | -1.57 | -2.53 |
| AY583048     | Protocadherin 1 gamma b 9                                                                                                                                                                             | pcdh2g29        | PCDHGA11 | -6.00 | -4.24 |
| AY576963     | Protocadherin 1 gamma 32                                                                                                                                                                              | pcdh1g32        | PCDHGC5  | -1.19 | -2.18 |
| BG727092     | Phosphoenolpyruvate carboxykinase 1 (soluble)                                                                                                                                                         | pkc1            | PCK1     | -3.39 | 6.05  |
| AW116521     | LOC327176 sim to protein-L-isospartate (D-aspartate) O-methyltransferase domain containing 1                                                                                                          | zgc:123165      | PCMTD1   | -0.56 | -1.50 |
| AF140608     | Proliferating cell nuclear antigen                                                                                                                                                                    | pcna            | PCNA     | 2.54  | 0.83  |
| BI671284     | 3' end of zgc:103434; phosphate cytidylyltransferase 2, ethanolamine and 5' to CH1073-467M9.4; sim to guanine nucleotide binding protein (G protein) family                                           | BI671284        | PCYT2    | 1.58  | 0.73  |
| BI880387     | LOC100007784 sim to phosducin                                                                                                                                                                         | LOC100007784    | PDC      | 1.66  | -2.73 |
| BG306678     | Phosducin 1                                                                                                                                                                                           | pdcl            | PDC      | 2.15  | -0.74 |
| AI883967     | Programmed cell death 11                                                                                                                                                                              | pcdcl11         | PCDCL11  | -0.40 | -2.35 |
| BC054132     | Programmed cell death 2                                                                                                                                                                               | pcdcl2          | PCDCL2   | -0.17 | -2.00 |
| BM181817     | Programmed cell death 4a                                                                                                                                                                              | pcdcl4a         | PCDCL4   | -0.28 | -1.93 |
| BM071298     | Programmed cell death 6                                                                                                                                                                               | pcdcl6          | PCDCL6   | -0.66 | -1.83 |
| BI889956     | Programmed cell death 7                                                                                                                                                                               | pcdcl7          | PCDCL7   | -1.21 | -2.02 |
| BI879847     | Phosphodiesterase 6G, cGMP-specific, rod, gamma                                                                                                                                                       | pd6g            | PDE6G    | -3.27 | -1.45 |
| BC095757     | Sim to phosphodiesterase 6G, cGMP-specific, rod, gamma                                                                                                                                                | zgc:112320      | PDE6G    | -1.36 | -2.18 |
| BG307503     | Sim to phosphodiesterase 8B                                                                                                                                                                           | BG307503        | PDE8B    | 3.80  | -1.34 |
| AF200951     | Platelet derived growth factor receptor alpha                                                                                                                                                         | pdgfra          | PDGFRA   | 3.62  | 1.70  |
| BC076185     | Pyruvate dehydrogenase E1 alpha 1                                                                                                                                                                     | zgc:92705       | PDHA1    | -0.43 | -1.51 |
| BG305862     | Pyruvate dehydrogenase (lipamide) beta                                                                                                                                                                | pdhb            | PDHB     | -1.61 | 0.34  |
| AI667512     | Protein disulfide isomerase family A, member 3                                                                                                                                                        | pdia3           | PDI3     | 2.21  | -1.66 |
| BC077131     | Protein disulfide isomerase A3                                                                                                                                                                        | zgc:100906      | PDI3     | 1.64  | -0.67 |
| BG304294     | LOC791995 sim to PDI3   protein disulfide isomerase family A, member 3                                                                                                                                | zgc:77086       | PDI3     | -1.13 | 2.25  |
| AI585024     | Intron of pdia3 protein disulfide isomerase family A, member 5                                                                                                                                        | AI585024        | PDI3     | 1.86  | 0.46  |
| AW232485     | Pyruvate dehydrogenase kinase 4                                                                                                                                                                       | si:pp71-57j15.4 | PDK2     | 3.00  | 2.77  |
| BC095249     | PDZ and LIM domain 3a                                                                                                                                                                                 | pdlim3a         | PDLIM3   | 1.75  | -0.93 |
| BM154358     | PDZ and LIM domain 7                                                                                                                                                                                  | pdlim7          | PDLIM7   | -7.97 | -1.72 |
| BC055193     | Yippee-like 5 (sim to pyruvate dehydrogenase phosphatase regulatory subunit)                                                                                                                          | ypl5            | PDPFR    | 0.62  | 3.11  |
| AF036325     | Pancreatic and duodenal homeobox 1                                                                                                                                                                    | pdx1            | PDX1     | -0.24 | 4.14  |
| BM185817     | Pyridoxal (pyridoxine, vitamin B6) kinase a                                                                                                                                                           | pdxca           | PDXK     | -0.72 | -1.69 |

|          |                                                                                                                                                                                        |                   |          |       |       |
|----------|----------------------------------------------------------------------------------------------------------------------------------------------------------------------------------------|-------------------|----------|-------|-------|
| BC085468 | LOC492499 sim to pyridoxal (pyridoxine, vitamin B6) kinase                                                                                                                             | zgc:101900        | PDXK     | 1.74  | 1.08  |
| AY309090 | Prodynorphin                                                                                                                                                                           | pdyn              | PDYN     | 5.09  | 0.90  |
| AA658595 | PDZ domain containing 1 like                                                                                                                                                           | pdzk11            | PDZK1    | -3.84 | -4.74 |
| BC076531 | LOC436918 sim to peroxisomal D3,D2-enoil-CoA isomerase                                                                                                                                 | zgc:92030         | PECI     | 1.96  | 0.66  |
| AI721587 | Sim to proline, glutamate and leucine rich protein 1                                                                                                                                   | LOC100003680      | PELP1    | 3.92  | 0.77  |
| BI709646 | Period homolog 4                                                                                                                                                                       | per4              | PER1     | -1.02 | -2.63 |
| BI890045 | PERP, TP53 apoptosis effector                                                                                                                                                          | perp              | PERP     | -3.37 | 1.41  |
| BI891290 | LOC393483 sim to prefolin subunit 6                                                                                                                                                    | zgc:66282         | PFDN6    | 2.41  | 0.54  |
| AW115515 | 6-phosphofructo-2-kinase/fructose-2,6-biphosphatase 3                                                                                                                                  | pkfb3             | PKFB3    | -3.22 | -0.60 |
| BI845214 | LOC550259 sim to phosphofructokinase, liver                                                                                                                                            | zgc:110298        | PFKL     | 2.35  | 2.00  |
| BC081652 | Phosphofructokinase, muscle                                                                                                                                                            | pkfm              | PFKM     | -4.39 | -2.83 |
| BI888926 | LOC799355 sim to profilin 2                                                                                                                                                            | LOC799355         | PFN2     | -3.08 | -0.39 |
| AI353257 | Phosphoglycerate mutase 2 (muscle)                                                                                                                                                     | pgam2             | PGAM2    | -5.22 | -2.85 |
| AI331440 | Sim to PGAP1   post-GPI attachment to proteins 1                                                                                                                                       | sidkey-191g15.7   | PGAP1    | 1.58  | 1.65  |
| BI883476 | Per1-like domain containing 1 precursor, post-GPI attachment to proteins 3                                                                                                             | zgc:171485        | PGAP3    | -0.89 | 2.71  |
| BI880695 | Prohibitin                                                                                                                                                                             | phb               | PHB      | -1.18 | -1.83 |
| AW154457 | PHD finger protein 6                                                                                                                                                                   | phf6              | PHF6     | 0.28  | -3.32 |
| AB010103 | Dharma (weak sim to paired-like homeobox 2b)                                                                                                                                           | dharma            | PHOX2B   | 1.18  | 2.30  |
| BF158382 | PHD and ring finger domains 1                                                                                                                                                          | phrf1             | PHRF1    | -0.97 | 1.78  |
| BM183976 | Phytoanoyl-CoA hydroxylase                                                                                                                                                             | phyh              | PHYH     | 2.48  | 1.75  |
| BC085396 | LOC492804 sim to phytoanoyl-CoA dioxygenase domain containing 1                                                                                                                        | zgc:101639        | PHYHD1   | 2.50  | 1.10  |
| BG883236 | 3' end of pi4kb   phosphatidylinositol 4-kinase, catalytic, beta and 5' to zgc:64042 sim to MYO1E   myosin IE                                                                          | BG883236          | PI4KB    | -3.10 | 0.73  |
| BI704177 | Phosphatidylinositol 4-kinase, catalytic, beta polypeptide                                                                                                                             | pi4kb             | PI4KB    | 1.28  | 2.22  |
| BM182311 | Protein inhibitor of activated STAT, 4-like                                                                                                                                            | pias4             | PIAS4    | -0.17 | -3.10 |
| AW279624 | Weak sim to phosphatidylinositol binding clathrin assembly protein                                                                                                                     | LOC100005187      | PICALM   | 3.45  | 3.22  |
| BC065590 | Phosphatidylinositol glycan, class F                                                                                                                                                   | pigf              | PIGF     | 1.65  | 1.12  |
| AI878774 | Phosphatidylinositol glycan, class P                                                                                                                                                   | pigp              | PIGP     | -2.56 | 0.38  |
| AI588435 | LOC571356 sim to phosphoinositide-3-kinase, class 2, alpha polypeptide                                                                                                                 | sidkey-2411.7     | PIK3C2A  | 0.72  | 2.20  |
| BQ078437 | Sim to PIK3C2B   phosphoinositide-3-kinase, class 2, beta polypeptide                                                                                                                  | im:7150469        | PIK3C2B  | 1.22  | 3.17  |
| BM025885 | LOC561737 sim to phosphoinositide 3-kinase catalytic subunit                                                                                                                           | LOC561737         | PIK3CA   | 2.24  | 1.95  |
| BI706734 | Sim to phosphoinositide-3-kinase, regulatory subunit 1 (alpha)                                                                                                                         | LOC557176         | PIK3R1   | 0.68  | 2.72  |
| BM317287 | Weak sim to PIM1   pim-1 oncogene                                                                                                                                                      | LOC100148646      | PIM1     | -1.41 | -1.83 |
| BI672275 | Weak sim to PIM1   pim-1 oncogene                                                                                                                                                      | LOC571281         | PIM1     | 1.51  | 1.63  |
| BI475851 | Intergenic 3' to pim1   pim-1 oncogene and 5' to DKEY-83K24.4                                                                                                                          | BI475851          | PIM2     | 3.01  | 0.61  |
| BQ618300 | 3' end of LOC564787   similar to Serine/threonine-protein kinase Pim-3 and 3' to rab3a   RAB3A, member RAS oncogene family                                                             | BQ618300          | PIM3     | -0.71 | -1.54 |
| BI705891 | Protein (peptidyl-prolyl cis/trans isomerase) NIMA-interacting 1                                                                                                                       | pin1              | PIN1     | 1.04  | 3.26  |
| BI672331 | Piwi-like 1 (Drosophila)                                                                                                                                                               | piwil1            | PIWIL1   | -0.44 | -2.11 |
| AI667249 | Pyruvate kinase, liver and RBC                                                                                                                                                         | pklr              | PKLR     | 2.51  | 4.48  |
| BI891882 | Pyruvate kinase, muscle a                                                                                                                                                              | pkm2a             | PKM2     | -2.03 | -1.45 |
| AW077091 | Plakophilin 3                                                                                                                                                                          | pkp3              | PKP3     | -3.05 | -2.26 |
| BI881145 | Plakophilin-like (sim to plakophilin 3)                                                                                                                                                | zgc:136656        | PKP3     | -4.06 | -1.62 |
| AI877926 | Phospholipase A2, group XV                                                                                                                                                             | pla2g15           | PLA2G15  | 2.77  | 2.23  |
| BM036485 | LOC436896 sim to phospholipase A2, group XVI                                                                                                                                           | zgc:92249         | PLA2G16  | -1.18 | -1.80 |
| BI475847 | Pleomorphic adenoma gene X (plagx)                                                                                                                                                     | plagx             | PLAG1    | -0.34 | 2.43  |
| AF186476 | Pleomorphic adenoma gene-like 2                                                                                                                                                        | plagl2            | PLAGL2   | 1.28  | -2.57 |
| BG892360 | LOC565641 weak sim to plasminogen activator, urokinase receptor                                                                                                                        | LOC565641         | PLAUR    | -1.19 | -2.50 |
| AW466858 | LOC337489 sim to phospholipase C, delta 1                                                                                                                                              | AW466858          | PLCD1    | -1.39 | -3.49 |
| BC061706 | Pleckstrin                                                                                                                                                                             | plek              | PLEK     | 5.32  | 2.44  |
| BI326382 | Intron of plekha8: pleckstrin homology domain containing, family A (phosphoinositide binding specific) member 8                                                                        | BI326382          | PLEKHA8  | 1.24  | 2.01  |
| BM071184 | Pleckstrin homology domain containing, family F (with FYVE domain) member 1                                                                                                            | plekhf1           | PLEKHF1  | -2.98 | -1.80 |
| AY654285 | Quattro (sim to pleckstrin homology domain containing, family G (with RhoGef domain) member 4B)                                                                                        | quo               | PLEKHG4B | 2.12  | 0.86  |
| BC059801 | Plasminogen                                                                                                                                                                            | plg               | PLG      | 3.85  | 5.18  |
| BC096807 | Perilipin 2                                                                                                                                                                            | plim2             | PLIN2    | 2.32  | 2.35  |
| AW116681 | Sim to polo-like kinase 1 (Drosophila)                                                                                                                                                 | AW116681          | PLK1     | -4.16 | -5.88 |
| BG303034 | Polo-like kinase 3 (Drosophila)                                                                                                                                                        | pk3               | PLK3     | -1.08 | -2.64 |
| BG307977 | LOC799067 sim to phospholamban                                                                                                                                                         | LOC799067         | PLN      | -3.22 | -1.48 |
| AI974140 | Procollagen-lysine 1, 2-oxoglutarate 5-dioxygenase 3                                                                                                                                   | plod3             | PLOD3    | -2.03 | 0.99  |
| AI497382 | 3' end of plrg1   pleiotropic regulator 1 and 3' to fgg   fibrinogen, gamma polypeptide                                                                                                | AI497382          | PLRG1    | 2.66  | -0.71 |
| BM181765 | LOC445125 sim to phospholipid transfer protein                                                                                                                                         | zgc:100903        | PLTP     | 3.29  | 3.77  |
| BI878456 | Plexin D1                                                                                                                                                                              | plxnd1            | PLXND1   | 0.70  | 4.30  |
| BI672438 | LOC553216 sim to peptidase M20 domain containing 1                                                                                                                                     | zgc:123113        | PM20D1   | -1.71 | -2.20 |
| BI866970 | Phosphomannomutase 2                                                                                                                                                                   | pmm2              | PMM2     | -1.00 | 2.63  |
| BI475826 | PMS1 postmeiotic segregation increased 1 (S. cerevisiae)                                                                                                                               | pms1              | PMS1     | -1.24 | -1.71 |
| AI444539 | PMS2 postmeiotic segregation increased 2 (S. cerevisiae)                                                                                                                               | pms2              | PMS2     | 1.02  | -2.52 |
| BE605389 | Nucleoside phosphorylase                                                                                                                                                               | np                | PNP      | 0.85  | 4.10  |
| AW077814 | Pyridoxine 5'-phosphate oxidase                                                                                                                                                        | pnpo              | PNPO     | 3.08  | -0.20 |
| AA495158 | Polymerase (DNA directed), alpha 1                                                                                                                                                     | pola1             | POLA1    | 4.25  | 0.83  |
| AW344260 | Polymerase (DNA directed), alpha 2                                                                                                                                                     | pola2             | POLA2    | 2.66  | 0.59  |
| BI891643 | Polymerase (DNA directed), beta                                                                                                                                                        | polb              | POLB     | 2.58  | 2.18  |
| BC045410 | Polymerase (DNA directed), delta 2, regulatory subunit                                                                                                                                 | pod2              | POLD2    | 2.82  | 1.10  |
| BM182566 | LOC100006179 sim to polymerase (DNA directed), epsilon 2 (p59 subunit)                                                                                                                 | LOC100006179      | POLE2    | 1.72  | 2.07  |
| AI793653 | Polymerase (DNA directed), eta                                                                                                                                                         | zgc:136881        | POLH     | 0.60  | 1.69  |
| BI844059 | Polymerase (RNA) III (DNA directed) polypeptide E                                                                                                                                      | polr3e            | POLR3E   | -2.08 | 0.31  |
| AY648756 | Polymerase (RNA) III (DNA directed) polypeptide F                                                                                                                                      | polr3f            | POLR3F   | 0.74  | -2.11 |
| BG303768 | POM121 membrane glycoprotein (rat)                                                                                                                                                     | pom121            | POM121C  | -3.99 | -0.54 |
| AY135148 | Proopiomelanocortin a (adrenocorticotropin/ beta-lipotropin/alpha-melanocyte stimulating hormone/ beta-melanocyte stimulating hormone/beta-endorphin)                                  | pomca             | POMC     | -2.44 | -0.46 |
| BC095793 | LOC554122 sim to paraoxonase 2                                                                                                                                                         | zgc:112374        | PON2     | 2.10  | 0.79  |
| BI983321 | Processing of precursor 4, ribonuclease P/MRP subunit                                                                                                                                  | pop4              | POP4     | -1.16 | 1.60  |
| BC091467 | Processing of precursor 5, ribonuclease P/MRP subunit (S. cerevisiae)                                                                                                                  | pop5              | POP5     | -2.37 | -1.73 |
| AW203110 | Sim to perostin, osteoblast specific factor                                                                                                                                            | LOC567379         | POSTN    | -2.09 | -0.37 |
| AF395831 | POU domain, class 4, transcription factor 2                                                                                                                                            | po4f2             | POU4F2   | -2.02 | -3.04 |
| X84224   | POU domain, class 5, transcription factor 1 (OCT-4)                                                                                                                                    | pou5f1            | POU5F1   | -1.27 | -5.14 |
| BI879231 | Peter pan homolog (Drosophila)                                                                                                                                                         | ppan              | PPAN     | -1.07 | -3.08 |
| AF342937 | Peroxisome proliferator-activated receptor delta a                                                                                                                                     | pparda            | PPARD    | 0.47  | 1.99  |
| AF342938 | Peroxisome proliferator-activated receptor delta b                                                                                                                                     | pparfb            | PPARD    | 2.21  | 1.30  |
| AW567464 | Peptidylprolyl isomerase A (cyclophilin A)                                                                                                                                             | ppia              | PIIA     | -2.02 | -1.68 |
| BI897492 | Peptidylprolyl isomerase B (cyclophilin B)                                                                                                                                             | ppib              | PIIB     | 0.32  | 2.84  |
| BI887309 | Peptidyl-prolyl isomerase G (cyclophilin G)                                                                                                                                            | ppig              | PIIG     | 0.43  | -2.04 |
| BI841405 | 3' end of ppil1: peptidylprolyl isomerase (cyclophilin)-like 1 and 3' end of sle6a11   solute carrier family 6 (neurotransmitter transporter, GABA), member 11 (more sim to member 13) | BI841405          | PPIL1    | -1.42 | -1.63 |
| BI890287 | Periplakin                                                                                                                                                                             | ppl               | PPL      | -5.31 | -2.30 |
| BG303651 | Protein phosphatase 1D magnesium-dependent, delta isoform (WIP1)                                                                                                                       | ppm1d             | PPM1D    | -3.60 | -3.14 |
| AW202926 | Protein phosphatase 1G (formerly 2C), magnesium-dependent, gamma isoform                                                                                                               | ppm1g             | PPM1G    | 3.20  | -0.60 |
| AW232124 | Protein phosphatase 1, catalytic subunit, beta isoform, like                                                                                                                           | ppp1cbl           | PPP1CB   | -0.87 | 3.15  |
| BM184537 | Sim to protein phosphatase 1, regulatory (inhibitor) subunit 12A                                                                                                                       | LOC571837         | PPP1R12A | -2.49 | 0.59  |
| BI890937 | LOC393783 sim to protein phosphatase 1, regulatory (inhibitor) subunit 14A                                                                                                             | zgc:73377         | PPP1R14A | -0.66 | 1.72  |
| BG305445 | Protein phosphatase 1, regulatory (inhibitor) subunit 14B                                                                                                                              | ppp1r14b          | PPP1R14B | 0.74  | 2.27  |
| BI876166 | LOC571470 weak sim protein phosphatase 1, regulatory (inhibitor) subunit 15B                                                                                                           | sidch211-107623.1 | PPP1R15B | 1.86  | 2.67  |
| BI886169 | Protein phosphatase 1, regulatory (inhibitor) subunit 3C                                                                                                                               | zgc:73259         | PPP1R3C  | 1.23  | 3.17  |
| BF157490 | Protein phosphatase 2 (formerly 2A), regulatory subunit A (PR 65), alpha isoform (more sim to PPR2R1B)                                                                                 | ppp2r1a           | PPP2R1A  | -1.75 | 0.88  |
| AI878244 | Protein phosphatase 2 (formerly 2A), regulatory subunit A (PR 65), alpha isoform                                                                                                       | ppp2r1a           | PPP2R1B  | -2.11 | 0.89  |
| BM072366 | PPPDE peptidase domain containing 2a                                                                                                                                                   | pppdc2a           | PPPDE2   | 1.45  | 2.55  |
| BI865895 | 3' end of ppt1   palmitoyl-protein thioesterase 1 (ceroid-lipofuscinosis, neuronal 1, infantile)                                                                                       | BI865895          | PPT1     | -1.65 | 0.96  |
| BI889958 | Protein regulator of cytokinesis 1                                                                                                                                                     | prc1              | PRC1     | -0.27 | -5.27 |

|           |                                                                                                                                                    |                  |          |       |       |
|-----------|----------------------------------------------------------------------------------------------------------------------------------------------------|------------------|----------|-------|-------|
| AI461323  | PR domain containing 12                                                                                                                            | zgc:101606       | PRDM12   | 0.53  | 1.50  |
| AA605696  | Peroxiredoxin 6                                                                                                                                    | prdx6            | PRDX6    | -2.01 | -1.69 |
| A1588696  | Prickle homolog 1 (Drosophila) b                                                                                                                   | prickle1b        | PRICKLE1 | -1.62 | -1.43 |
| AW174526  | cAMP-dependent protein kinase catalytic subunit                                                                                                    | zgc:91856        | PRKACA   | 2.57  | 0.73  |
| BC054603  | Protein kinase C, beta 1, like                                                                                                                     | prkeb11          | PRKCB    | 2.02  | -0.33 |
| BM181735  | Protein kinase C, beta b                                                                                                                           | prkeb            | PRKCB1   | 4.20  | 2.68  |
| AW116649  | Protein kinase C substrate 80K-H                                                                                                                   | prkesh           | PRKCSH   | 2.06  | 1.10  |
| AI601576  | Intron of LOC556339 sim to PRKG2: protein kinase, cGMP-dependent, type II                                                                          | AI601576         | PRKG2    | 6.19  | 0.27  |
| BC092358  | Prolectin                                                                                                                                          | prl              | PRL      | 1.60  | 2.30  |
| BI475857  | 3' end of prlra: prolactin receptor a and 5' end to zgc:158706; LOC572528 sim to ARID5A: AT rich interactive domain 5A (MRF1-like)                 | wu:ffj65e07      | PRLR     | -1.88 | -2.45 |
| BI891684  | Protein arginine methyltransferase 1                                                                                                               | prmt1            | PRMT1    | -1.08 | -2.29 |
| BC053182  | Protein C (inactivator of coagulation factors Va and VIIIa)                                                                                        | proc             | PROC     | 3.70  | 2.36  |
| AI476972  | LOC436664 sim to proline dehydrogenase (oxidase) 2                                                                                                 | zgc:92040        | PRODH2   | 2.33  | 1.60  |
| BE693164  | 3' end of prop1   paired-like homeodomain transcription factor prop1 and 3' to mcf2   multiple coagulation factor deficiency 2                     | BE693164         | PROP1    | 2.52  | 1.38  |
| AY032595  | Prospero-related homeobox gene 1                                                                                                                   | prox1            | PROX1    | 1.54  | 3.71  |
| AF210644  | Retinal degradation slow 4                                                                                                                         | rds4             | PRPH2    | -1.54 | -0.53 |
| BE015655  | LOC791604 sim to retinal degeneration slow protein                                                                                                 | zgc:73336        | PRPH2    | 1.50  | -0.74 |
| AJ297822  | Trypsin                                                                                                                                            | try              | PRSS1    | -4.15 | -0.58 |
| BF171729  | LOC474322 sim to protease, serine, 3 (mesotrypsin)                                                                                                 | zgc:92590        | PRSS3    | -3.99 | -3.02 |
| BC077104  | LOC554458 weak sim to protease, serine, 36                                                                                                         | zgc:100868       | PRSS36   | -1.67 | -2.27 |
| AW202972  | LOC100101646 weak sim to protease, serine, 36                                                                                                      | zgc:165423       | PRSS36   | -3.38 | -1.11 |
| AI477424  | Proteasome (prosome, macropain) subunit, alpha type, 2                                                                                             | psma2            | PSMA2    | -2.21 | -0.53 |
| AF155581  | Proteasome (prosome, macropain) subunit, beta type, 7                                                                                              | psmb7            | PSMB7    | -3.63 | 1.14  |
| AF032390  | Proteasome (prosome, macropain) subunit, beta type, 8                                                                                              | psmb8            | PSMB8    | 1.98  | 0.19  |
| AW019161  | Proteasome (prosome, macropain) 26S subunit, non-ATPase, 10                                                                                        | psmd10           | PSMD10   | 0.23  | -2.32 |
| AI641775  | Proteasome (prosome, macropain) 26S subunit, non-ATPase, 2                                                                                         | psmd2            | PSMD2    | 2.43  | -0.31 |
| BI839952  | Proteasome (prosome, macropain) 26S subunit, non-ATPase, 3                                                                                         | psmd3            | PSMD3    | -0.31 | 2.40  |
| AI793350  | Proteasome (prosome, macropain) 26S subunit, non-ATPase, 4                                                                                         | psmd4            | PSMD4    | -1.61 | 1.58  |
| AW419901  | Paraspeckle component 1                                                                                                                            | pspc1            | PSPC1    | 4.53  | 1.02  |
| BI888210  | Polypyrimidine tract binding protein 1                                                                                                             | ptbp1            | PTBP1    | -1.83 | -0.97 |
| BI867303  | Sim to prostaglandin E synthase 2                                                                                                                  | BI867303         | PTGES2   | -2.20 | -1.04 |
| AW077232  | 3' end of im:6903726 sim to PTGR2   prostaglandin reductase 2 and 3' to zgc:77419 sim to TME62   transmembrane protein 62                          | wu:ffj34d06      | PTGR2    | 1.36  | -2.43 |
| AF132082  | Parathyroid hormone 2 receptor                                                                                                                     | pth2r            | PTH2R    | -0.47 | 4.07  |
| NM_194376 | Prothymosin, alpha 4                                                                                                                               | ptmaa            | PTMA     | -0.51 | 2.41  |
| BG304253  | Intron of wu:fc14d08 sim to PTP4A3   protein tyrosine phosphatase type IVA, member 3                                                               | BG304253         | PTP4A3   | -1.58 | -1.26 |
| BI843539  | Intergenic 5' to zgc:77752: LOC393862 and 3' to zgc:77650 sim to ARF5                                                                              | BI843539         | PTPDC1   | -3.27 | -3.79 |
| BC055174  | Protein tyrosine phosphatase-like A domain containing 1                                                                                            | ptplad1          | PTPLAD1  | 3.12  | 0.97  |
| AW421037  | Intergenic 3' to zgc:113105 sim to PTPN18   protein tyrosine phosphatase, non-receptor type 18 and 5' to plxna3 plexin A3                          | wu:ffj78f12      | PTPN18   | -2.04 | -0.38 |
| AW116344  | Protein tyrosine phosphatase, non-receptor type 2, like                                                                                            | ptpn2l           | PTPN2    | -1.90 | 0.73  |
| BI889244  | Sim to PTPN9   protein tyrosine phosphatase, non-receptor type 9                                                                                   | LOC560176        | PTPN9    | 1.60  | -1.10 |
| AW594810  | Weak sim to PTPRC   protein tyrosine phosphatase, receptor type, C (partially)                                                                     | AW594810         | PTPRC    | 0.65  | 1.62  |
| BI840692  | LOC100148757 weak sim to protein tyrosine phosphatase, receptor type, D                                                                            | LOC100148757     | PTPRD    | -3.83 | -3.30 |
| BG305324  | Sim to PTPRE: protein tyrosine phosphatase, receptor type, E                                                                                       | LOC569164        | PTPRE    | 0.54  | 1.54  |
| BI880896  | 3' end of ptpqr   protein tyrosine phosphatase, receptor type, Q and 3' to LOC555340 sim to IQSEC3   IQ motif and Sec7 domain 3                    | BI880896         | PTPRQ    | 1.41  | 1.76  |
| AJ311886  | Protein tyrosine phosphatase, receptor type, S                                                                                                     | ptprs            | PTPRS    | 1.25  | 3.87  |
| AI330860  | LOC336776 weak sim to pentraxin-related gene, rapidly induced by IL-1 beta                                                                         | si:ch211-272f3.3 | PTX3     | -1.52 | -1.57 |
| BI878946  | PWP2 periodic tryptophan protein homolog (yeast)                                                                                                   | pwp2h            | PWP2     | 0.91  | -2.53 |
| BI673753  | Paxillin                                                                                                                                           | pxn              | PXN      | 3.89  | -4.05 |
| AF231013  | PYD and CARD domain containing                                                                                                                     | pycard           | PYCARD   | -1.73 | -1.27 |
| AW058876  | Pyroline-5-carboxylate reductase 1                                                                                                                 | pycr1            | PYCR1    | -2.12 | -1.48 |
| AI884070  | Intergenic 3' to pygb   phosphorylase, glycogen; brain and 3' to abhd12 abhydrolase domain containing 12                                           | AI884070         | PYGB     | 2.35  | -1.02 |
| AW115768  | Glutamyl-tRNA synthase (glutamine-hydrolyzing)-like 1                                                                                              | qrs1l            | QRS1L    | -1.44 | -2.27 |
| AI793834  | LOC386994 sim to RAB11A, member RAS oncogene family                                                                                                | zgc:63565        | RAB11A   | -2.35 | -1.11 |
| BQ616271  | 3' end of Rab14: RAB14, member RAS oncogene family, like and 3' of LOC100000720: similar to v-abl Abelson murine leukemia viral oncogene homolog 1 | BQ616271         | RAB14    | -0.69 | -1.57 |
| AW175399  | RAB14, member RAS oncogene family                                                                                                                  | rab14            | RAB14    | 1.46  | 1.57  |
| AJ496921  | RAB1A, member RAS oncogene family                                                                                                                  | rab1a            | RAB1A    | -1.84 | 2.41  |
| BI891631  | RAB25, member RAS oncogene family                                                                                                                  | rab25            | RAB25    | -2.41 | -2.62 |
| AW058859  | RAB28, member RAS oncogene family                                                                                                                  | rab28            | RAB28    | 1.05  | 2.37  |
| BC049531  | RAB32, member RAS oncogene family                                                                                                                  | rab32            | RAB32    | -0.27 | 2.81  |
| BI982099  | RAB3C, member RAS oncogene family                                                                                                                  | rab3c            | RAB3C    | 1.47  | -1.75 |
| AI585084  | RAB3 GAPase activating protein subunit 2 (non-catalytic)                                                                                           | rab3gap2         | RAB3GAP2 | 0.30  | 2.51  |
| BC076375  | LOC436797 sim to RAB40B, member RAS oncogene family                                                                                                | zgc:92926        | RAB40B   | -2.62 | -0.76 |
| BI892446  | RAB5A, member RAS oncogene family like                                                                                                             | rab5al           | RAB5A    | 1.53  | 1.85  |
| BI884413  | RAB5B, member RAS oncogene family                                                                                                                  | rab5b            | RAB5B    | 1.64  | 2.74  |
| BI705589  | RAB6A, member RAS oncogene family                                                                                                                  | rab6a            | RAB6A    | 2.14  | 3.29  |
| BM103996  | Kelch repeat-containing protein (weak sim to Rab9 effector protein with kelch motifs)                                                              | krpc             | RABEPK   | -2.30 | -3.79 |
| BF156891  | RAB guanine nucleotide exchange factor (GEF) 1                                                                                                     | rabgef1          | RABGEF1  | 0.74  | 2.71  |
| AI793816  | RAB interacting factor                                                                                                                             | rabif            | RABIF    | -0.60 | 2.34  |
| BI867235  | RAB, member of RAS oncogene family-like 3                                                                                                          | rabl3            | RABL3    | 2.53  | 3.09  |
| BI889437  | Ras-related C3 botulinum toxin substrate 1 (rho family, small GTP binding protein Rac1)                                                            | rac1             | RAC1     | -0.86 | 2.41  |
| BI890225  | Ras-related C3 botulinum toxin substrate 3 (rho family, small GTP binding protein Rac3)                                                            | rac3             | RAC3     | 1.58  | 2.04  |
| BI980132  | Rac GTPase-activating protein 1                                                                                                                    | racgap1          | RACGAP1  | 2.62  | 3.29  |
| AW184428  | RAD51 homolog (RecA homolog, E. coli) (S. cerevisiae)                                                                                              | rad51            | RAD51    | 2.18  | -1.90 |
| DQ021477  | RAD52 homolog (S. cerevisiae)                                                                                                                      | rad52            | RAD52    | 1.61  | -1.59 |
| BI881477  | RAS related protein 1b                                                                                                                             | rap1b            | RAP1B    | 0.31  | 2.51  |
| AI793909  | 3' end of zgc:175180; RAPI GTPase activating protein and 3' to spsb1; splA/ryanodine receptor domain and SOCS box containing 1                     | wu:fb95f11       | RAP1GAP  | -1.84 | -3.31 |
| BI474934  | LOC100144557 sim to RAPI GTPase activating protein                                                                                                 | zgc:175180       | RAP1GAP  | -1.87 | -1.56 |
| BI671914  | RAP2B, member of RAS oncogene family                                                                                                               | rap2b            | RAP2B    | 0.15  | 2.67  |
| AW420252  | RAP2C, member of RAS oncogene family                                                                                                               | rap2c            | RAP2C    | -1.59 | 2.45  |
| AW115989  | Sim to arginyl-tRNA synthetase 2, mitochondrial                                                                                                    | AW115989         | RARS2    | -2.12 | -0.96 |
| AW115682  | RasGEF domain family, member 1Ba                                                                                                                   | rasgef1ba        | RASGEF1B | -2.47 | 1.96  |
| AA497284  | Ras-like family 11 member A                                                                                                                        | zgc:110179       | RASL11A  | 2.89  | 0.89  |
| BI879607  | Intergenic 3' or intron of rbbp6l: retinoblastoma binding protein 6-like or intron                                                                 | BI879607         | RBBP6    | 0.88  | 1.59  |
| CD605211  | RanBP-type and C3HC4-type zinc finger containing 1                                                                                                 | zgc:91964        | RBCK1    | -1.78 | 1.66  |
| BC071473  | Ribokinase                                                                                                                                         | rbks             | RBKS     | 1.96  | 0.95  |
| AW281574  | Retinoblastoma-like 1 (p107)                                                                                                                       | rb1l             | RBL1     | -0.88 | -1.96 |
| BC051781  | RNA binding motif protein 28                                                                                                                       | rbm28            | RBM28    | 2.88  | 0.89  |
| AW175474  | RNA-binding region (RNP1, RRM) containing 1                                                                                                        | rbm38            | RBM38    | 1.66  | 4.05  |
| AI878421  | RNA binding motif protein 4.1                                                                                                                      | rbm4.1           | RBM4     | -2.69 | -0.89 |
| AW165263  | RNA binding motif protein 5                                                                                                                        | rbm5             | RBM5     | 1.72  | 2.42  |
| AY395732  | Retinol binding protein 1b, cellular                                                                                                               | rbp1b            | RBP1     | -2.18 | -4.56 |
| AF448140  | Retinol binding protein 2a, cellular                                                                                                               | rbp2a            | RBP2     | -0.32 | -2.13 |
| X85957    | Sim to interphotoreceptor retinol-binding protein                                                                                                  | irbp             | RBP3     | -2.85 | -0.78 |
| CN505126  | Retinol binding protein 4, like                                                                                                                    | rbp4l            | RBP4     | 0.11  | 2.32  |
| BI878598  | Regulator of chromosome condensation (RCC1) and BTB (POZ) domain containing protein 1                                                              | rcbtb1           | RCBTB1   | 0.45  | -2.26 |
| BI983343  | Regulator of chromosome condensation 1                                                                                                             | rec1             | RCC1     | 1.53  | 2.79  |
| BI890056  | Retinol dehydrogenase 10                                                                                                                           | rdh10b           | RDH10    | -1.84 | -2.96 |
| BI672318  | Retinol dehydrogenase 1, like (all trans)                                                                                                          | rdh11            | RDH16    | 3.28  | 3.41  |
| AW019090  | Epidermal retinal dehydrogenase 2                                                                                                                  | rdhe2            | RDHE2    | 3.70  | 1.86  |
| BI891332  | Radixin                                                                                                                                            | rdx              | RDX      | 2.10  | 2.69  |
| AY163839  | V-rel reticuloendotheliosis viral oncogene homolog A                                                                                               | rela             | RELA     | 0.35  | 2.74  |
| BG883859  | REL Tumor necrosis factor receptor                                                                                                                 | relt             | RELT     | -2.55 | -1.01 |
| AY167037  | Renin                                                                                                                                              | ren              | REN      | -0.78 | -2.42 |



|           |                                                                                                                                                                                       |            |         |       |       |
|-----------|---------------------------------------------------------------------------------------------------------------------------------------------------------------------------------------|------------|---------|-------|-------|
| BM156937  | 3' end of renbp renin binding protein and 3' to si:ch211-218o21.2 sim to KDM5C   lysine (K)-specific demethylase 5C                                                                   | BM156937   | RENBP   | 0.68  | -2.39 |
| AF007949  | Receptor tyrosine kinase                                                                                                                                                              | ret1       | RET     | 1.60  | -1.06 |
| BI673663  | Small fragment nuclease; sim to REXO2   REX2, RNA exonuclease 2 homolog                                                                                                               | smfn       | REXO2   | -0.09 | -2.39 |
| BI890048  | Replication factor C (activator) 1 3                                                                                                                                                  | rfc3       | RFC3    | 3.73  | -0.67 |
| AY648755  | Replication factor C (activator) 1 5                                                                                                                                                  | rfc5       | RFC5    | 2.58  | -0.74 |
| BC067339  | LOC405832 sim to ring finger and FYVE-like domain containing 1                                                                                                                        | zgc:77828  | RFFL    | -1.88 | -0.89 |
| BG727567  | 3' end of rfx1b   regulatory factor X, 1b and 3' to wu:fc06e01 sim to DCAF15   DDB1 and CUL4 associated factor 15                                                                     | BG727567   | RFX1    | -2.34 | -1.26 |
| AI2121391 | Regulatory factor X, 2 (influences HLA class II expression)                                                                                                                           | rfx2       | RFX2    | -1.81 | -1.07 |
| BC091800  | RGM domain family, member A                                                                                                                                                           | rgma       | RGMA    | 0.18  | -2.45 |
| BG305908  | 3' end of rgr: retinal G protein coupled receptor                                                                                                                                     | BG305908   | RGR     | -1.61 | -2.20 |
| AW127926  | Regulator of G-protein signalling 14                                                                                                                                                  | rgs14      | RGS14   | -1.89 | -2.48 |
| AI883982  | LOC445235 sim to regulator of G-protein signaling 3                                                                                                                                   | zgc:100933 | RGS3    | -2.18 | -1.93 |
| AW282047  | Rhesus blood group-associated glycoprotein                                                                                                                                            | rhag       | RHAG    | -2.10 | -1.58 |
| AF209468  | Rh50-like protein (Rh family, C glycoprotein)                                                                                                                                         | rh50       | RHCG    | 2.32  | 3.45  |
| BC066492  | Rhesus blood group, C glycoprotein                                                                                                                                                    | rhcg       | RHCG    | 2.34  | 2.55  |
| BI888792  | Ras homolog gene family, member Ab                                                                                                                                                    | rhoab      | RHOA    | 0.83  | 1.92  |
| AW115884  | Ras homolog gene family, member T1a                                                                                                                                                   | rhot1a     | RHOT1   | -0.33 | 1.53  |
| BM186358  | Ras homolog gene family, member T2                                                                                                                                                    | rhot2      | RHOT2   | -6.80 | -2.24 |
| AY314756  | Ras homolog gene family, member V (more similar to RHOU   ras homolog gene family, member U)                                                                                          | rhov       | RHOU    | 1.68  | -0.29 |
| BI981058  | Regulating synaptic membrane exocytosis 2                                                                                                                                             | rims2      | RIMS1   | -2.82 | 1.25  |
| BM101597  | Receptor-interacting serine-threonine kinase 4                                                                                                                                        | ripk4      | RIPK4   | -1.64 | -0.27 |
| BI891065  | Retinaldehyde binding protein 1b                                                                                                                                                      | rlbp1b     | RLBP1   | 0.35  | 1.63  |
| BI476474  | Relaxin 3                                                                                                                                                                             | rln3       | RLN3    | -1.09 | 5.45  |
| BF717998  | Ribonuclease like 2                                                                                                                                                                   | rnase2     | RNASE2  | -2.05 | -2.41 |
| NM_212854 | Rho family GTPase 1                                                                                                                                                                   | rnd1       | RND1    | 1.03  | 2.28  |
| BC076009  | Rho family GTPase 3b                                                                                                                                                                  | rnd3b      | RND3    | -2.39 | 1.25  |
| BM035975  | LOC619251 sim to ring finger protein 11                                                                                                                                               | zgc:114095 | RNF11   | 2.02  | 1.39  |
| BI475873  | Sim to ring finger protein 19A                                                                                                                                                        | LOC557995  | RNF19A  | 1.96  | 0.65  |
| AW305541  | Ring finger protein 2                                                                                                                                                                 | rnf2       | RNF2    | -1.51 | 2.45  |
| AI942512  | LOC678565 sim to ribonuclease/angiogenesis inhibitor 1                                                                                                                                | zgc:136791 | RNH1    | -2.55 | -2.56 |
| BQ092666  | RNA-binding region (RNP1, RRM) containing 3                                                                                                                                           | rnpc3      | RNPC3   | 1.92  | -1.15 |
| AF337035  | Roundabout homolog 2                                                                                                                                                                  | robo2      | ROBO2   | 1.82  | 4.12  |
| AF295804  | Rho-associated, coiled-coil containing protein kinase 2a                                                                                                                              | rock2a     | ROCK2   | 1.79  | 2.54  |
| BI846960  | RAR-related orphan receptor A, paralogue b                                                                                                                                            | rorab      | RORA    | -1.11 | -1.66 |
| AI477564  | Ribosomal protein L10                                                                                                                                                                 | rlp10      | RPL10   | 1.84  | 3.35  |
| BI891769  | Ribosomal protein L10a                                                                                                                                                                | rlp10a     | RPL10A  | -1.72 | 3.60  |
| AF385081  | Ribosomal protein L13                                                                                                                                                                 | rlp13      | RPL13   | 0.99  | 2.64  |
| BM153976  | Ribosomal protein L13a                                                                                                                                                                | rlp13a     | RPL13A  | 0.82  | 2.60  |
| BI891434  | Ribosomal protein L18a                                                                                                                                                                | rlp18a     | RPL18   | 0.78  | 3.57  |
| BI886167  | Ribosomal protein L19                                                                                                                                                                 | rlp19      | RPL19   | 1.20  | 2.81  |
| BI707410  | Ribosomal protein L23a                                                                                                                                                                | rlp23a     | RPL23A  | -0.29 | 3.03  |
| CN014167  | Ribosomal protein L26                                                                                                                                                                 | rlp26      | RPL26   | 0.17  | 1.80  |
| BI890906  | Ribosomal protein L28-like                                                                                                                                                            | rlp28l     | RPL28   | 0.11  | 3.30  |
| BI710147  | Ribosomal protein L30                                                                                                                                                                 | rlp30      | RPL30   | 0.42  | 3.12  |
| BI887366  | Ribosomal protein L34                                                                                                                                                                 | rlp34      | RPL34   | 1.86  | 2.07  |
| BM096077  | Ribosomal protein L35                                                                                                                                                                 | rlp35      | RPL35   | 0.31  | 2.63  |
| BI891138  | Ribosomal protein L35a                                                                                                                                                                | rlp35a     | RPL35A  | 3.21  | 1.59  |
| AI106421  | Ribosomal protein L36                                                                                                                                                                 | rlp36      | RPL36   | 0.18  | 3.31  |
| AI353168  | Ribosomal protein L36A                                                                                                                                                                | rlp36a     | RPL36AL | 0.96  | 1.63  |
| CF595288  | Ribosomal protein L4                                                                                                                                                                  | rlp4       | RPL4    | -0.54 | 1.89  |
| AI964289  | Ribosomal protein L5b                                                                                                                                                                 | rlp5b      | RPL5    | 0.29  | 3.83  |
| BG305988  | Ribosomal protein L7                                                                                                                                                                  | rlp7       | RPL7    | 1.85  | 2.84  |
| AI964218  | Ribosomal protein L7a                                                                                                                                                                 | rlp7a      | RPL7A   | 0.45  | 1.68  |
| AW128744  | Ribosomal protein L8                                                                                                                                                                  | rlp8       | RPL8    | 1.03  | 2.40  |
| BI890218  | Ribosomal protein L9                                                                                                                                                                  | rlp9       | RPL9    | -0.55 | 3.18  |
| AF134852  | Ribosomal protein, large, P0                                                                                                                                                          | rlp0       | RPLP0   | -1.03 | 2.26  |
| AI330989  | Ribosomal protein, large, P1                                                                                                                                                          | rlp1       | RPLP1   | -1.08 | 2.49  |
| AI965225  | Ribophorin I                                                                                                                                                                          | rpm1       | RPN1    | 1.06  | 1.95  |
| AI793600  | Sim to ribophorin II                                                                                                                                                                  | AI793600   | RPN2    | -0.58 | 1.82  |
| BI842921  | Ribosomal protein S10                                                                                                                                                                 | rsp10      | RPS10   | 1.65  | 2.46  |
| BI892430  | Ribosomal protein S11                                                                                                                                                                 | rsp11      | RPS11   | 1.93  | 2.86  |
| BM070699  | Ribosomal protein S12                                                                                                                                                                 | rsp12      | RPS12   | 1.00  | 2.43  |
| AI722592  | Ribosomal protein S14                                                                                                                                                                 | rsp14      | RPS14   | 1.59  | 2.49  |
| BM183474  | Ribosomal protein S15                                                                                                                                                                 | rsp15      | RPS15   | -0.27 | 2.95  |
| BM104738  | Ribosomal protein S15a                                                                                                                                                                | rsp15a     | RPS15A  | 1.72  | 2.37  |
| AF210641  | Ribosomal protein S18                                                                                                                                                                 | rsp18      | RPS18   | 1.32  | 2.74  |
| AW076723  | Ribosomal protein S2                                                                                                                                                                  | rsp2       | RPS2    | -0.53 | 2.13  |
| AW232284  | Ribosomal protein S21                                                                                                                                                                 | rsp21      | RPS21   | 0.12  | 2.55  |
| BI318094  | Ribosomal protein S25                                                                                                                                                                 | rsp25      | RPS25   | -0.24 | 2.43  |
| BF717296  | Ribosomal protein S26                                                                                                                                                                 | rsp26      | RPS26   | -0.36 | 1.89  |
| BM156154  | Ribosomal protein S26, like                                                                                                                                                           | rsp26l     | RPS26   | -0.34 | 2.89  |
| BM155568  | Ribosomal protein S29                                                                                                                                                                 | rsp29      | RPS29   | 1.27  | 3.50  |
| AA606173  | Ribosomal protein S3                                                                                                                                                                  | rsp3       | RPS3    | 0.66  | 4.33  |
| AI588833  | Ribosomal protein S3A                                                                                                                                                                 | rsp3a      | RPS3A   | -1.05 | 1.92  |
| AI964239  | Ribosomal protein S4, X-linked                                                                                                                                                        | rsp4x      | RPS4X   | -0.32 | 1.99  |
| BE017895  | Ribosomal protein S5                                                                                                                                                                  | rsp5       | RPS5    | -0.85 | 2.35  |
| AI478010  | Ribosomal protein S7                                                                                                                                                                  | rsp7       | RPS7    | 1.01  | 1.90  |
| BI889445  | Ribosomal protein S8                                                                                                                                                                  | rsp8       | RPS8    | -0.52 | 2.18  |
| AI964216  | Ribosomal protein S9                                                                                                                                                                  | rsp9       | RPS9    | -0.50 | 3.01  |
| AI384355  | Ribosomal protein SA                                                                                                                                                                  | rspa       | RPSA    | -0.86 | 2.72  |
| BM156813  | Related RAS viral (v-ras) oncogene homolog                                                                                                                                            | rras       | RRAS    | -1.80 | 0.35  |
| BI672948  | LOC100144565 sim to ribosome binding protein 1                                                                                                                                        | zgc:171356 | RRBP1   | 1.58  | 0.75  |
| AI667289  | Sim to ras responsive element binding protein 1                                                                                                                                       | wu:fc38g07 | RREB1   | -2.01 | 0.85  |
| U57964    | Ribonucleotide reductase M1 polypeptide                                                                                                                                               | rrm1       | RRM1    | 0.60  | 2.61  |
| BI866879  | Ribonucleotide reductase M2 polypeptide                                                                                                                                               | rrm2       | RRM2    | 2.02  | 4.17  |
| CK702787  | Sim to remodeling and spacing factor 1                                                                                                                                                | CK702787   | RSF1    | -1.69 | -1.69 |
| BI983061  | Reticulon 1 a                                                                                                                                                                         | rt1a       | RTN1    | -2.32 | 0.75  |
| BE201762  | Reticulon 3                                                                                                                                                                           | rt3        | RTN3    | 0.62  | 2.26  |
| BC081614  | Reticulon 4a                                                                                                                                                                          | rt4a       | RTN4    | -2.77 | -3.73 |
| BG305505  | 3' end of LOC100004523 similar to reticulon 4 receptor-like 1                                                                                                                         | BG305505   | RTN4RL1 | 4.45  | 2.49  |
| AY263332  | reticulon 4 receptor-like 2 a                                                                                                                                                         | rt4rl2a    | RTN4RL2 | 1.24  | 2.79  |
| AY263334  | Reticulon 4 receptor-like 2b                                                                                                                                                          | rt4rl2b    | RTN4RL2 | 0.38  | -2.92 |
| BG303457  | Rap2 interacting protein (RUN domain containing 3A)                                                                                                                                   | rap2ip     | RUNDC3A | -2.36 | 3.97  |
| AB043787  | Runt-related transcription factor 1                                                                                                                                                   | runx1      | RUNX1   | 1.22  | 2.21  |
| BG308524  | Runt-related transcription factor 1; translocated to, 1 (cyclin D-related)                                                                                                            | LOC563252  | RUNX1T1 | -1.93 | -0.84 |
| AY382181  | Runt-related transcription factor 2b                                                                                                                                                  | runx2b     | RUNX2   | -1.61 | 1.32  |
| AW153781  | RuvB-like 2 (E. coli)                                                                                                                                                                 | ruvb2      | RUVBL2  | 2.11  | 2.52  |
| AI878606  | 3' end of LOC100007598 sim to RXFP3   relaxin/insulin-like family peptide receptor 3 and 5' to LOC100007476 similar to uveal autoantigen with coiled-coil domains and ankyrin repeats | wu:fc62e05 | RXFP3   | 2.50  | -1.01 |
| U29942    | Retinoid x receptor, beta a                                                                                                                                                           | rxrab      | RXRA    | 2.42  | 2.14  |
| AI958589  | 3' end of ryr1a   ryanodine receptor 1a (skeletal)                                                                                                                                    | wu:fa97h07 | RYR3    | -2.34 | -1.78 |
| BM104515  | S100 calcium binding protein A1                                                                                                                                                       | s100a1     | S100A1  | -4.27 | -4.30 |
| CK872210  | LOC449788 sim to S100 calcium binding protein A10a                                                                                                                                    | s100a10a   | S100A1  | -2.39 | -2.17 |
| BC080247  | S100 calcium binding protein S                                                                                                                                                        | s100s      | S100A1  | 3.39  | -1.06 |
| AW202804  | S100 calcium binding protein U                                                                                                                                                        | s100u      | S100A1  | -1.93 | -1.75 |
| AW595487  | Ictacalcin 2 sim to S100 calcium binding protein A4                                                                                                                                   | icn2       | S100A4  | -4.26 | 2.32  |
| BG985836  | Sal-like 1a                                                                                                                                                                           | sall1a     | SALL1   | 1.86  | 2.29  |
| BC090729  | Sim to Sin3A-associated protein, 18kDa                                                                                                                                                | LOC794620  | SAP18   | -2.25 | -2.22 |

|           |                                                                                                                                         |                  |          |       |       |
|-----------|-----------------------------------------------------------------------------------------------------------------------------------------|------------------|----------|-------|-------|
| AW128723  | Sap30-like                                                                                                                              | sap30l           | SAP30L   | -1.53 | 0.68  |
| BG304241  | Spindle assembly 6 homolog (C. elegans)                                                                                                 | sass6            | SASS6    | 0.46  | -4.61 |
| AW078366  | Secretory carrier membrane protein 2                                                                                                    | scamp2           | SCAMP2   | 1.95  | 2.33  |
| BI886699  | Secretory carrier membrane protein 2 like                                                                                               | scamp2l          | SCAMP2L  | 0.38  | -4.09 |
| BC085533  | Secretory carrier membrane protein 3                                                                                                    | zgc:103488       | SCAMP3   | 1.59  | 0.71  |
| BC065670  | Secretory carrier membrane protein 5                                                                                                    | scamp5           | SCAMP5   | -2.19 | 1.28  |
| BE202194  | Scavenger receptor class B, member 1                                                                                                    | scarb1           | SCARB1   | -1.28 | -3.17 |
| BC095851  | Sim to stearyl-CoA desaturase 4 isoform a                                                                                               | zgc:112951       | SCD      | 4.10  | 0.96  |
| BC090478  | Sec1 family domain containing 2                                                                                                         | scfd2            | SCFD2    | 0.93  | 2.07  |
| AW117001  | Scinderin like b                                                                                                                        | scimb            | SCIN     | -1.96 | 1.80  |
| AW154574  | Serine carboxypeptidase 1                                                                                                               | sepep1           | SCPEP1   | -1.14 | -1.90 |
| BG305416  | Sim to SCY1-like 1 (S. cerevisiae)                                                                                                      | wu:fk36e11       | SCYL1    | 3.23  | 0.57  |
| AW019206  | 3' end of s1ch211-244b2.1 sim to SCYL2   SCY1-like 2 and 3' to s1ch211-244b2.3 weak sim to ZC3HAV1   zinc finger CCHC-type, antiviral 1 | wu:fd50f01       | SCYL2    | 1.69  | 1.16  |
| AI959694  | Syndecan 4                                                                                                                              | sdca             | SDC4     | -1.04 | 2.40  |
| BI886016  | Syndecan binding protein (syntenin)                                                                                                     | sdcbp            | SDCBP    | 2.45  | 1.95  |
| AW232790  | 3' end of zgc:163000 : succinate dehydrogenase assembly factor 2, mitochondrial precursor                                               | AW232790         | SDHAF2   | -1.74 | -0.92 |
| BI702979  | Succinate dehydrogenase complex, subunit B, iron sulfur (lp)                                                                            | sdbh             | SDHB     | -1.59 | -1.23 |
| BI671139  | LOC402824 sim to serum deprivation response protein                                                                                     | LOC402824        | SDPR     | -3.16 | 1.03  |
| AF466189  | OG9 homeobox gene/mezzo                                                                                                                 | og9x             | SEBOX    | 3.74  | 0.85  |
| AI883266  | SEC22 vesicle trafficking protein homolog A (S. cerevisiae)                                                                             | sec22a           | SEC22A   | 2.05  | 0.89  |
| BG302794  | Sec3lp homolog (yeast)                                                                                                                  | sec3lp           | SEC31A   | 0.93  | 4.20  |
| AY029527  | Sec61 alpha like 1                                                                                                                      | sec61a1l         | SEC61A1  | 0.27  | 2.53  |
| BC081491  | Selenoprotein K                                                                                                                         | zgc:103591       | SELK     | 0.90  | 1.78  |
| BI889650  | Selenoprotein T, 1b                                                                                                                     | selt1b           | SELT     | -1.40 | -2.50 |
| AF083382  | Semaphorin 3ab                                                                                                                          | sema3ab          | SEMA3A   | -2.53 | 1.37  |
| AL721402  | Intergenic 3' to sema3gb   semaphorin 3gb and 3' to wasb   Wiskott-Aldrich syndrome (eczema-thrombocytopenia) b                         | AL721402         | SEMA3F   | -1.20 | -1.62 |
| AY766120  | Semaphorin 3ga                                                                                                                          | sema3ga          | SEMA3F   | 2.08  | 0.47  |
| AY766121  | Semaphorin 3gb                                                                                                                          | sema3gb          | SEMA3F   | -3.41 | -0.31 |
| AF073289  | Semaphorin 4e (sim to sema domain, immunoglobulin domain (Ig), transmembrane domain (TM) and short cytoplasmic domain, (semaphorin) 4D) | sema4e           | SEMA4D   | -2.24 | -2.01 |
| BI843214  | LOC571373 weak sim to SENP7: SUMO1/sentrin specific peptidase 7 [Homo sapiens]                                                          | LOC571373        | SENP7    | 2.03  | -0.95 |
| AF322071  | Selenoprotein P, plasma, 1a                                                                                                             | sepp1a           | SEPP1    | -1.79 | -3.56 |
| AF322072  | Selenoprotein P, plasma, 1b                                                                                                             | sepp1b           | SEPP1    | -2.35 | -3.01 |
| BE606074  | Septin 6                                                                                                                                | septe6           | SEPT6    | 3.39  | 3.75  |
| BF717472  | Selenoprotein X, 1                                                                                                                      | sepx1            | SEPX1    | 0.27  | -2.26 |
| NM_199727 | Serine incorporator 1 (Tumor differentially expressed 2)                                                                                | serinc1          | SERINC1  | -0.06 | 1.96  |
| AW116276  | LOC569338 sim to serine incorporator 1                                                                                                  | si:ch211-232d9.2 | SERINC1  | -5.11 | -4.82 |
| AW018949  | Serine (or cysteine) proteinase inhibitor, clade A (alpha-1 antiproteinase, antitrypsin), member 1                                      | serpina1         | SERPINA1 | 1.88  | 4.54  |
| AW018965  | LOC556938 sim to serpin peptidase inhibitor, clade A (alpha-1 antiproteinase, antitrypsin), member 1                                    | zgc:113828       | SERPINA1 | 4.66  | 4.20  |
| BC083441  | Serpin peptidase inhibitor, clade A (alpha-1 antiproteinase, antitrypsin), member 7                                                     | serpina7         | SERPINA7 | 3.51  | 3.70  |
| BF717503  | Serine (or cysteine) proteinase inhibitor, clade C (antithrombin), member 1                                                             | serpinc1         | SERPINC1 | 2.47  | 5.08  |
| BG799195  | Serine (or cysteine) proteinase inhibitor, clade D (heparin cofactor), member 1                                                         | serpind1         | SERPIND1 | -0.61 | 2.72  |
| BM184276  | Serpin peptidase inhibitor, clade F, member 2, like                                                                                     | serpinf2l        | SERPINF2 | 4.91  | 3.01  |
| BC067135  | SERTA domain containing 2                                                                                                               | sertad2          | SERTAD2  | 2.29  | -1.34 |
| AI964822  | Weak sim to SETD8   SET domain containing (lysine methyltransferase) 8                                                                  | LOC100003868     | SETD8    | 2.89  | -1.50 |
| BI886759  | SET domain, bifurcated 2                                                                                                                | setdb2           | SETDB2   | 1.22  | 1.95  |
| BC066392  | Splicing factor 3a, subunit 1                                                                                                           | sf3a1            | SF3A1    | -0.77 | -2.05 |
| AB055672  | Secreted frizzled-related protein 5                                                                                                     | sfrp5            | SFRP5    | -0.45 | -3.24 |
| BI890669  | Splicing factor, arginine/serine-rich 2                                                                                                 | sfrs2            | SFRS2    | 1.82  | 2.18  |
| BM072333  | Splicing factor, arginine/serine-rich 6b                                                                                                | sfrs6b           | SFRS6    | -3.10 | 2.26  |
| BC053226  | SFT2 domain containing 1                                                                                                                | sf2d1            | SFT2D1   | 2.66  | 2.66  |
| BI673509  | LOC503601 sim to SF2 domain containing 1                                                                                                | zgc:110788       | SFT2D1   | -1.94 | -2.65 |
| BI673466  | Serum/glucocorticoid regulated kinase 1                                                                                                 | sgk1             | SGK1     | 4.61  | 4.61  |
| BI670851  | LOC768159 sim to serum/glucocorticoid regulated kinase 1                                                                                | zgc:154030       | SGK1     | -1.52 | -0.72 |
| AI544889  | LOC559050 sim to serum/glucocorticoid regulated kinase 1                                                                                | zgc:154065       | SGK1     | 0.99  | 1.73  |
| AW281658  | SH3-domain binding protein 5 (BTK-associated)                                                                                           | sh3bp5           | SH3BP5   | 1.12  | -2.65 |
| BI983776  | SH3-domain GRB2-like 3                                                                                                                  | sh3gl3           | SH3GL3   | -1.63 | -0.49 |
| BM154195  | SH3-domain GRB2-like 3-like                                                                                                             | zgc:158742       | SH3GL3   | 0.53  | -1.55 |
| AA658631  | Sim to SH3 and multiple ankyrin repeat domains 3                                                                                        | AA658631         | SHANK3   | -1.83 | -2.10 |
| AW019651  | Sex hormone binding globulin                                                                                                            | shbg             | SHBG     | 5.97  | 4.60  |
| L27585    | Sonic hedgehog a                                                                                                                        | shha             | SHH      | 2.56  | 4.09  |
| U30710    | Sonic hedgehog b (twh; twhh)                                                                                                            | shhb             | SHH      | 2.64  | 3.44  |
| BE605465  | Sim to SHROOM2   shroom family member 2                                                                                                 | LOC571333        | SHROOM2  | 1.75  | -1.17 |
| BI885759  | Shroom family member 4                                                                                                                  | shroom4          | SHROOM4  | 1.54  | 1.98  |
| BI886779  | Seven in absentia homolog 1 (Drosophila)                                                                                                | siah1            | SIAH1    | -2.30 | -2.35 |
| BG729183  | 3' end of siah1 seven in absentia homolog 2 (Drosophila)-like and 3' to rbmx2   RNA binding motif protein, X-linked 2                   | BG729183         | SIAH2    | 2.89  | 0.43  |
| BI983651  | Sigma non-opioid intracellular receptor 1                                                                                               | sigmar1          | SIGMAR1  | 0.97  | -2.21 |
| AW076688  | Silver homolog (mouse) a                                                                                                                | silva            | SILV     | -0.53 | -3.95 |
| BM072610  | Sirtuin (silent mating type information regulation 2 homolog) 3 (S. cerevisiae)                                                         | sirt3            | SIRT3    | 2.16  | -0.53 |
| AB045623  | Sine oculis homeobox homolog 4.2                                                                                                        | six4.2           | SIX4     | -0.45 | 2.63  |
| AW420324  | Src kinase associated phosphoprotein 2                                                                                                  | skap2            | SKAP2    | 2.00  | 0.14  |
| AF060117  | Nuclear oncoprotein skia (v-ski sarcoma viral oncogene homolog (avian))                                                                 | skia             | SKI      | -0.89 | 2.05  |
| AI545551  | Intron of Superkiller viralicidic activity 2 (S. cerevisiae homolog)-like (skiv2l)                                                      | AI545551         | SKIV2L   | 0.78  | 2.24  |
| AW019603  | Sim to solute carrier family 13 (sodium-dependent citrate transporter), member 5                                                        | si:ch211-221p4.4 | SLC13A5  | 3.86  | 2.12  |
| AW165069  | LOC326634 sim to solute carrier family 14 (urea transporter), member 2                                                                  | zgc:136632       | SLC14A2  | -3.12 | -2.85 |
| AW018970  | Solute carrier family 15 (oligopeptide transporter), member 1                                                                           | slc15a1          | SLC15A1  | -2.24 | -3.68 |
| AW154070  | Solute carrier family 15 (H+/peptide transporter), member 2                                                                             | slc15a2          | SLC15A2  | -2.09 | -2.42 |
| AW184640  | LOC449947 sim to solute carrier family 16, member 12 (monocarboxylic acid transporter 12)                                               | zgc:110441       | SLC16A12 | -1.49 | -2.32 |
| BI985003  | LOC574425 sim to solute carrier family 16, member 13 (monocarboxylic acid transporter 13)                                               | zgc:114041       | SLC16A13 | -1.74 | -2.01 |
| AW116414  | Solute carrier family 16 (monocarboxylic acid transporters), member 3                                                                   | slc16a3          | SLC16A3  | -3.70 | -4.64 |
| AW232016  | Solute carrier family 17 (sodium-dependent inorganic phosphate cotransporter), member 6a                                                | slc17a6l         | SLC17A6  | 0.37  | 1.78  |
| AW059376  | 3' end of slc17a9b   solute carrier family 17, member 9b                                                                                | AW059376         | SLC17A9  | 2.90  | 1.55  |
| BG729177  | 3' end of slc17a9b: solute carrier family 17, member 9b                                                                                 | BG729177         | SLC17A9  | 6.42  | 2.41  |
| BI840114  | LOC555979 sim to solute carrier family 22, member 23                                                                                    | zgc:171831       | SLC22A23 | -5.76 | 0.76  |
| BI865582  | Solute carrier family 22, member 7-like                                                                                                 | zgc:63958        | SLC22A7  | -1.39 | -2.41 |
| BM095990  | Solute carrier family 25 (mitochondrial carrier, citrate transporter), member 1                                                         | slc25a1          | SLC25A1  | -0.35 | -2.69 |
| BC045395  | Solute carrier family 25 (mitochondrial carrier, brain), member 14                                                                      | slc25a14         | SLC25A14 | 2.69  | -1.22 |
| AI942949  | Solute carrier family 25 (carnitine/acylcarnitine translocase), member 20                                                               | slc25a20         | SLC25A20 | 0.17  | 3.13  |
| BC066404  | Solute carrier family 25 (mitochondrial carrier; phosphate carrier), member 25                                                          | slc25a25         | SLC25A25 | -1.04 | -2.74 |
| BC096793  | Solute carrier family 25, member 26                                                                                                     | slc25a26         | SLC25A26 | -2.27 | -1.57 |
| BG306043  | Solute carrier family 25 (mitochondrial carrier; phosphate carrier), member 3, like                                                     | slc25a31         | SLC25A3  | -1.35 | 3.17  |
| AW174196  | Solute carrier family 25, member 32a                                                                                                    | slc25a32a        | SLC25A32 | 2.85  | 2.25  |
| CK702997  | 3' end of slc25a36b   solute carrier family 25, member 36b and 5' to LOC558375 sim to to Tripartite motif-containing protein 16         | CK702997         | SLC25A36 | 1.54  | 1.26  |
| AA605664  | Solute carrier family 25 (mitochondrial carrier; adenine nucleotide translocator), member 4                                             | slc25a4          | SLC25A4  | -4.06 | -2.16 |
| AI883208  | LOC436633 sim to solute carrier family 25, member 40                                                                                    | zgc:92520        | SLC25A40 | 1.57  | 0.56  |
| AW127912  | Solute carrier family 25 alpha, member 5                                                                                                | slc25a5          | SLC25A5  | -0.56 | 2.55  |
| BG799220  | Sim to solute carrier family 27 (fatty acid transporter), member 1                                                                      | zgc:153860       | SLC27A1  | 0.56  | 4.41  |
| AI477656  | Solute carrier family 2 (facilitated glucose transporter), member 5(pseudo)                                                             | slc2a5           | SLC2A5   | 4.62  | 2.52  |
| BC049409  | Solute carrier family 2 (facilitated glucose transporter), member 8-like                                                                | slc2a8l          | SLC2A8   | 2.85  | 1.62  |
| AB055665  | Solute carrier family 2 (facilitated glucose transporter), member 15a                                                                   | slc2a15a         | SLC2A9   | 1.68  | 5.93  |
| AI522773  | Solute carrier family 30 (zinc transporter), member 6                                                                                   | slc30a6          | SLC30A6  | -1.13 | -4.76 |
| BC055208  | Solute carrier family 33 (acetyl-CoA transporter), member 1                                                                             | slc33a1          | SLC33A1  | 4.62  | 0.45  |

|           |                                                                                                                                                                   |                 |         |       |       |
|-----------|-------------------------------------------------------------------------------------------------------------------------------------------------------------------|-----------------|---------|-------|-------|
| AW343846  | Solute carrier family 34 (sodium phosphate), member 2b                                                                                                            | slc34a2b        | SLC34A2 | 1.21  | 2.84  |
| BC057491  | Solute carrier family 35, member A5                                                                                                                               | slc35a5         | SLC35A5 | 2.25  | -0.22 |
| AW115742  | Solute carrier family 35, member B1                                                                                                                               | slc35b1         | SLC35B1 | -2.86 | -0.96 |
| BM183463  | Solute carrier family 37 (glycerol-3-phosphate transporter), member 2                                                                                             | slc37a2         | SLC37A2 | -1.51 | 2.66  |
| BI877883  | Solute carrier family 38, member 3                                                                                                                                | slc38a3         | SLC38A3 | -2.50 | -1.08 |
| BC096946  | Solute carrier family 38, member 4                                                                                                                                | slc38a4         | SLC38A4 | 2.73  | -2.31 |
| BM184056  | Solute carrier family 39 (zinc transporter), member 3                                                                                                             | slc39a3         | SLC39A1 | 2.02  | 0.62  |
| BC090821  | Solute carrier family 39 (zinc transporter), member 9                                                                                                             | slc39a9         | SLC39A9 | 1.71  | 0.78  |
| AI641064  | LOC790938 weak sim to solute carrier family 3 (activators of dibasic and neutral amino acid transport), member 2                                                  | zgc:158423      | SLC3A2  | -0.78 | -1.60 |
| AW019543  | Solute carrier family 41, member 1                                                                                                                                | slc41a1         | SLC41A1 | 4.18  | 1.99  |
| AW117094  | 3' end of zgc:103664; solute carrier family 43, member 2 and 5' to LOC566188 sim to INPP5J   inositol polyphosphate-5-phosphatase 1                               | wu:fi32b04      | SLC43A2 | -3.56 | -3.85 |
| AW115724  | Choline transporter-like protein 2 sim to SLC44A2: solute carrier family 44, member 2                                                                             | zgc:63569       | SLC44A2 | -3.28 | -2.74 |
| AI477964  | Intron of slc42a2 solute carrier family 4, anion exchanger, member 2a                                                                                             | AI477964        | SLC4A2  | 2.48  | 0.86  |
| BC058316  | Solute carrier family 5 (sodium/glucose cotransporter), member 1                                                                                                  | slc5a1          | SLC5A1  | -2.39 | -4.16 |
| BI472731  | LOC692318 sim to SLC6A1   solute carrier family 6 (neurotransmitter transporter, GABA), member 1                                                                  | zgc:136569      | SLC6A1  | -0.81 | 1.65  |
| BC059804  | Solute carrier family 6 (neurotransmitter transporter), member 19                                                                                                 | slc6a19         | SLC6A19 | -3.18 | -0.74 |
| AW019145  | LOC553256 sim to solute carrier family 6 (neutral amino acid transporter), member 19                                                                              | zgc:162095      | SLC6A19 | -2.36 | -3.12 |
| AW076663  | 3' end of slc7a4   solute carrier family 7 (cationic amino acid transporter, + system), member 4                                                                  | AW076663        | SLC7A4  | -1.78 | -1.82 |
| BQ284787  | Solute carrier family 8 (sodium/calcium exchanger), member 4b                                                                                                     | slc8a4b         | SLC8A1  | -0.46 | 2.02  |
| AF127920  | MAD homolog 5 (Drosophila)                                                                                                                                        | smad5           | SMAD5   | -1.67 | -2.26 |
| BI841943  | MAD, mothers against decapentaplegic homolog 7 (Drosophila)                                                                                                       | smad7           | SMAD7   | -0.30 | 2.25  |
| BI704195  | MAD homolog 9 (Drosophila)                                                                                                                                        | smad9           | SMAD9   | 3.87  | -0.45 |
| AW154421  | SWI/SNF related, matrix associated, actin dependent regulator of chromatin, subfamily a, member 2                                                                 | smarca2         | SMARCA2 | 0.94  | 2.44  |
| BE016502  | SWI/SNF related, matrix associated, actin dependent regulator of chromatin, subfamily a, member 4                                                                 | smarca4         | SMARCA4 | 1.64  | -0.42 |
| BI980217  | SWI/SNF related, matrix associated, actin dependent regulator of chromatin, subfamily e, member 1                                                                 | smarce1         | SMARCE1 | -2.81 | 1.36  |
| BC044141  | Structural maintenance of chromosomes 2                                                                                                                           | smc2            | SMC2    | -3.20 | -2.08 |
| AF083557  | Survival motor neuron 1                                                                                                                                           | smn1            | SMN1    | -2.12 | -0.10 |
| AF096509  | Smoothed homolog (Drosophila)                                                                                                                                     | smo             | SMO     | 2.02  | -1.89 |
| BI844024  | Sim to SPARC related modular calcium binding 1                                                                                                                    | LOC795519       | SMOC1   | 0.83  | 2.45  |
| AJ009864  | Spermine synthase                                                                                                                                                 | sms             | SMS     | -2.74 | 1.16  |
| AI437336  | WW domain containing E3 ubiquitin protein ligase 1 (SMAD specific E3 ubiquitin protein ligase 1)                                                                  | wwp1            | SMURF1  | 3.86  | 0.92  |
| AI601278  | SET and MYND domain containing 1 a                                                                                                                                | smyd1a          | SMYD1   | -4.25 | -1.84 |
| AF091594  | Synaptosome-associated protein 25 b                                                                                                                               | snap25b         | SNAP25  | 2.74  | -0.25 |
| AI353581  | LOC796145 sim to synaptosomal-associated protein, 91kDa homolog                                                                                                   | LOC796145       | SNAP91  | -1.42 | -1.52 |
| AW420768  | LOC567959 sim to SNAP-associated protein                                                                                                                          | si:dkey-222b8.2 | SNAPIN  | 1.63  | 1.50  |
| BI671665  | Intron of LOC100001856 similar to Sushi, nidogen and EGF-like domain-containing protein 1 precursor (Insulin-responsive sequence DNA-binding protein 1) (IRE-BP1) | BI671665        | SNED1   | -1.82 | -1.37 |
| BI842571  | SNF related kinase                                                                                                                                                | snrk            | SNRK    | 1.61  | -0.36 |
| BI885984  | Small nuclear ribonucleoprotein polypeptide C                                                                                                                     | snrpc           | SNRPC   | -0.93 | -2.10 |
| BM037469  | Small nuclear ribonucleoprotein D3 polypeptide                                                                                                                    | snrpd3          | SNRPD3  | -1.59 | -2.47 |
| BG304285  | Sim to SNW domain containing 1                                                                                                                                    | BG304285        | SNW1    | -2.46 | 0.68  |
| BF157344  | Sim to sorting nexin 12                                                                                                                                           | snx12           | SNX12   | -1.31 | 2.11  |
| BC090713  | Sorting nexin 13                                                                                                                                                  | zgc:113125      | SNX13   | -1.61 | -0.45 |
| BG728207  | LOC55448 sim to Sorting nexin 8                                                                                                                                   | snx8            | SNX8    | -0.36 | -2.79 |
| BC091825  | Sorting nexin 9                                                                                                                                                   | snx9            | SNX9    | -3.50 | 0.43  |
| BG303759  | 3' end of socs2 suppressor of cytokine signaling 2                                                                                                                | BG303759        | SOCS2   | 1.55  | 0.85  |
| Y12236    | Superoxide dismutase 1, soluble                                                                                                                                   | sod1            | SOD1    | 2.45  | 2.10  |
| AI721653  | LOC792544 part sim to SON DNA binding protein                                                                                                                     | wu:fc30f01      | SON     | 3.13  | 0.30  |
| BI983463  | Sim to SORL1   sortilin-related receptor, L(DLR class) A                                                                                                          | LOC567650       | SORL1   | 0.90  | -2.59 |
| U85091    | SRY-box containing gene 11b                                                                                                                                       | sox11b          | SOX11   | -1.99 | -3.24 |
| AF101266  | SRY-box containing gene 21a                                                                                                                                       | sox21a          | SOX14   | -1.89 | -2.50 |
| AB071895  | SRY-box containing gene 32                                                                                                                                        | sox32           | SOX17   | -3.33 | 0.55  |
| X79821    | SRY-box containing gene 19a                                                                                                                                       | sox19a          | SOX2    | -2.27 | -2.02 |
| AW059068  | SRY-box containing gene 19b                                                                                                                                       | sox19b          | SOX2    | -1.78 | -2.07 |
| BI980800  | SRY-box containing gene 2                                                                                                                                         | sox2            | SOX2    | -2.29 | -0.48 |
| BG985680  | SRY-box containing gene 3                                                                                                                                         | sox3            | SOX3    | -1.97 | -1.74 |
| AW344031  | SRY-box containing gene 8                                                                                                                                         | sox8            | SOX8    | 0.63  | 2.23  |
| AI641094  | Sp1 transcription factor                                                                                                                                          | sp1             | SP1     | 1.16  | 6.47  |
| BC093591  | LOC550611 weak sim to SP100 nuclear antigen                                                                                                                       | zgc:113411      | SP100   | -1.86 | -0.51 |
| BC065349  | LOC402928 sim to Sp6 transcription factor                                                                                                                         | zgc:77358       | SP6     | -2.54 | -1.18 |
| BI473004  | Signal peptidase complex subunit 1 homolog                                                                                                                        | spcs1           | SPCS1   | 1.57  | 1.45  |
| AI793770  | Signal peptidase complex subunit 2 homolog (S. cerevisiae)                                                                                                        | spcs2           | SPCS2   | 1.20  | 1.94  |
| AW019444  | 3' end of spcs2   signal peptidase complex subunit 2 homolog and 3' to defb3 defensin, beta-like 3                                                                | wu:fe11f09      | SPCS2   | 1.75  | 1.58  |
| AI721702  | SPEG complex locus                                                                                                                                                | spcg            | SPEG    | 2.37  | -1.57 |
| AI544644  | Sim to SPG20   spastic paraplegia 20 (Troyer syndrome)                                                                                                            | LOC791952       | SPG20   | -3.06 | -1.47 |
| AF371368  | Sprouty (Drosophila) homolog 4                                                                                                                                    | spry4           | SPRY4   | 4.97  | 4.55  |
| AI883714  | Sim to SPTLC2: serine palmitoyltransferase, long chain base subunit 2                                                                                             | zgc:175221      | SPTLC2  | 3.14  | 0.79  |
| BI884972  | V-src sarcoma (Schmidt-Ruppin A-2) viral oncogene homolog (avian)                                                                                                 | src             | SRC     | 2.44  | 2.76  |
| BI889953  | LOC10003709 sim to sterol regulatory element binding transcription factor 2                                                                                       | zgc:158371      | SREBF2  | -1.43 | 1.62  |
| BI885993  | Signal recognition particle 54                                                                                                                                    | srp54           | SRP54   | 1.58  | 2.83  |
| AF164472  | Intron sim to serine/arginine repetitive matrix 1                                                                                                                 | AF164472        | SRRM1   | 1.29  | 2.32  |
| AF164483  | Serine/arginine repetitive matrix 1                                                                                                                               | srrm1           | SRRM1   | 1.84  | 4.16  |
| AF364084  | Signal sequence receptor, beta                                                                                                                                    | srr2            | SSR2    | -0.39 | 2.43  |
| BM104604  | Signal sequence receptor, gamma                                                                                                                                   | srr3            | SSR3    | 4.40  | 1.60  |
| BI888470  | Structure specific recognition protein 1a                                                                                                                         | srrp1a          | SSRP1   | -0.08 | -2.04 |
| AJ238017  | Somatostatin 2                                                                                                                                                    | sst2            | SST     | 0.28  | -2.25 |
| AW174328  | Suppression of tumorigenicity 14 (colon carcinoma) a                                                                                                              | st14a           | ST14    | -2.42 | -1.83 |
| BM082738  | ST3 beta-galactoside alpha-2,3-sialyltransferase 1                                                                                                                | st3gal1         | ST3GAL2 | -0.87 | -5.25 |
| AW116215  | ST3 beta-galactoside alpha-2,3-sialyltransferase 2, like                                                                                                          | st3gal2l        | ST3GAL2 | 0.86  | 2.82  |
| BM182555  | ST6 beta-galactosidase alpha-2,6-sialyltransferase 1                                                                                                              | st6gal1         | ST6GAL1 | -1.05 | -1.72 |
| BG799048  | Beta-galactosidase alpha-2,6-sialyltransferase 2                                                                                                                  | st6gal2         | ST6GAL2 | -0.60 | 2.41  |
| BM184316  | ST8 alpha-N-acetylneuraminidase alpha-2,8-sialyltransferase 2                                                                                                     | st8sia2         | ST8SIA2 | 0.90  | -3.36 |
| AI584415  | Signal transducing adaptor molecule (SH3 domain and ITAM motif) 1                                                                                                 | stam            | STAM    | 1.95  | 1.33  |
| AF220435  | Steroidogenic acute regulatory protein                                                                                                                            | star            | STAR    | -3.48 | -1.08 |
| AJ005693  | Signal transduction and activation of transcription 3                                                                                                             | stat3           | STAT3   | -1.06 | 2.53  |
| BI879876  | Intron of stat5.1   signal transducer and activator of transcription 5.1                                                                                          | BI879876        | STAT5B  | 2.22  | 1.99  |
| AI884184  | 3' end of stat5.1   signal transducer and activator of transcription 5.1                                                                                          | wu:fc75a07      | STAT5B  | 0.90  | 1.84  |
| AW115780  | Staufen, RNA binding protein, homolog 2 (Drosophila)                                                                                                              | stau2           | STAU2   | 0.43  | 3.07  |
| CD605508  | Stromal interaction molecule 1                                                                                                                                    | si:dkey-24p1.5  | STIM1   | 1.32  | -2.83 |
| BM156040  | 3' end of stk38   serine/threonine kinase 38 like and 5' to pion   pigeon homolog                                                                                 | BM156040        | STK38L  | 2.01  | 1.22  |
| BI891936  | Stathmin 1a                                                                                                                                                       | stmn1a          | STMN1   | -1.30 | 3.93  |
| AW184525  | Integral membrane protein 1 (STT3, subunit of the oligosaccharyltransferase complex, homolog A (S. cerevisiae))                                                   | itm1            | STT3A   | 2.50  | 2.73  |
| BC062862  | Syntaxin 11b.1                                                                                                                                                    | stx11b.1        | STX11   | -1.11 | -2.39 |
| AI721420  | Syntaxin binding protein 6 (amisyn)                                                                                                                               | stxbp6          | STXBP6  | -2.63 | 0.26  |
| BC078355  | Suppressor of defective silencing 3 homolog (SDS3, S. cerevisiae)                                                                                                 | suds3           | SUDS3   | 3.20  | -0.78 |
| NM_183348 | Sulfotransferase family 1, cytosolic sulfotransferase 3                                                                                                           | sult1st3        | SULT1A1 | 2.65  | -3.11 |
| AW174510  | Sulfotransferase family, cytosolic sulfotransferase 6                                                                                                             | sult1st6        | SULT1C2 | 1.11  | -2.43 |
| BC056283  | SMT3 suppressor of mi1 two 3 homolog 1 (yeast)                                                                                                                    | sumo1           | SUMO1   | 1.72  | 0.87  |
| AW233541  | Weak sim to SUN2   Sad1 and UNC84 domain containing 2                                                                                                             | LOC796761       | SUN2    | 1.83  | -0.36 |
| BM156926  | Surfeit 6-like                                                                                                                                                    | surf6l          | SURF6   | -1.24 | -2.69 |
| AI721414  | Suppressor of zeste 12 homolog b                                                                                                                                  | suz12b          | SUZ12   | -1.51 | 0.69  |
| AW018950  | LOC559122 weak sim to SVEP1 sushi, von Willebrand factor type A, EGF and pentraxin                                                                                | LOC559122       | SVEP1   | -1.39 | -1.73 |

|                                                                                                         |                                                                                                                                                                       |                  |          |       |       |
|---------------------------------------------------------------------------------------------------------|-----------------------------------------------------------------------------------------------------------------------------------------------------------------------|------------------|----------|-------|-------|
| AI641697                                                                                                | domain containing 1                                                                                                                                                   | im:7142403       | SVIL     | -1.35 | -2.18 |
| Sim to supervillin                                                                                      |                                                                                                                                                                       | LOC100001855     | SVIL     | -1.00 | -3.85 |
| BG302925                                                                                                | LOC100001855 sim to supervillin                                                                                                                                       | zgc:63599        | SWAP70   | 3.43  | 0.80  |
| BM182436                                                                                                | LOC393645 sim to SWAP-70 protein                                                                                                                                      | LOC568900        | SYCN     | -2.35 | -2.76 |
| AA566708                                                                                                | LOC568900 sim to syncollin                                                                                                                                            | DKKEY-90N12.3    | SYN1     | 1.49  | 1.76  |
| BI534277                                                                                                | LOC570672 sim to synapsin 1                                                                                                                                           | pep4b            | SYN2     | 1.45  | -2.84 |
| BI981168                                                                                                | Purkinje cell protein 4b sim to synapsin II                                                                                                                           | wu:jj32a12       | SYNCRIP  | -2.30 | 0.65  |
| BI980133                                                                                                | 3' end of syncrpl   synaptotagmin binding, cytoplasmic RNA interacting protein, like and 3' to si:dkey-3h2.3 weak sim to NLRK3   NLR family, CARD domain containing 3 | si:dkey-274e14.3 | SYNE2    | 0.57  | 1.53  |
| BE201590                                                                                                | Weak sim to SYNE2 spectrin repeat containing, nuclear envelope 2                                                                                                      | AI723329         | SYNJ1    | 2.24  | 0.81  |
| AI723329                                                                                                | Intergenic 3' to synj1   synaptotagmin 1 and 5' to slc9a6b   solute carrier family 9 (sodium/hydrogen exchanger), member 6b                                           | synpr            | SYNPR    | -2.98 | -2.10 |
| BI844823                                                                                                | Synaptotagmin                                                                                                                                                         | syph             | SYP      | 2.63  | -0.77 |
| BI670974                                                                                                | Synaptophysin b                                                                                                                                                       | sy4              | SYT4     | 0.91  | -3.09 |
| AW174543                                                                                                | Synaptotagmin IV                                                                                                                                                      | syvnl            | SYVNI    | 3.05  | 1.36  |
| BE200811                                                                                                | Synovial apoptosis inhibitor 1, synoviolin                                                                                                                            | ntl              | T        | -1.03 | -5.22 |
| S57147                                                                                                  | No tail                                                                                                                                                               | tacc3            | TACC3    | -1.05 | -4.29 |
| BI705624                                                                                                | Transforming, acidic coiled-coil containing protein 3                                                                                                                 | zgc:85851        | TADA1    | -1.32 | 2.00  |
| BI671845                                                                                                | Transcriptional adaptor 1-like protein                                                                                                                                | tada2b           | TADA2B   | 4.56  | 0.91  |
| BC055562                                                                                                | Transcriptional adaptor 2 (ADA2 homolog, yeast)-beta                                                                                                                  | taf5l            | TAF5L    | -3.59 | -2.80 |
| AW154429                                                                                                | TAF5-like RNA polymerase II, p300/CBP-associated factor (PCAF)-associated factor                                                                                      | taf8             | TAF8     | -2.20 | -0.95 |
| AI353492                                                                                                | TAF8 RNA polymerase II, TATA box binding protein (TBP)-associated factor                                                                                              | taf9             | TAF9     | 0.88  | -2.07 |
| BI673379                                                                                                | TAF9 RNA polymerase II, TATA box binding protein (TBP)-associated factor                                                                                              | zgc:86811        | TAF9     | -4.41 | 1.00  |
| BI867933                                                                                                | LOC415208 sim to TAF9 RNA polymerase II, TATA box binding protein (TBP)-associated factor, 32kDa                                                                      | taldo1           | TALDO1   | 2.20  | 2.63  |
| BI896473                                                                                                | Transaldolase 1                                                                                                                                                       | BM026665         | TAOK3    | -2.71 | -1.37 |
| BM026665                                                                                                | 3' end of LOC798408 sim to TAOK3   TAO kinase 3 and 3' to pbp   phosphatidylethanolamine binding protein                                                              | abcb31           | TAP2     | -3.10 | -2.57 |
| AF032394                                                                                                | ATP-binding cassette, sub-family B (MDR/TAP), member 3 like 1                                                                                                         | zgc:92586        | TARS     | 2.33  | 2.30  |
| AI641018                                                                                                | Threonyl-tRNA synthetase                                                                                                                                              | tat              | TAT      | 4.01  | 5.93  |
| AI522688                                                                                                | Tyrosine aminotransferase                                                                                                                                             | zgc:110443       | TBC1D17  | 1.79  | 1.81  |
| BI983522                                                                                                | LOC554092 sim to TBC1 domain family, member 17                                                                                                                        | BI672484         | TBC1D9   | -2.04 | 0.73  |
| BI672484                                                                                                | 3' end of sic2h211-199e19.3 sim to TBC1D9: TBC1 domain family, member 9 (with GRAM domain) and 5' to ucp4: uncoupling protein 4                                       | tba              | TBCA     | 3.14  | 0.33  |
| BM025937                                                                                                | Tubulin cofactor a                                                                                                                                                    | tbc              | TBCB     | 0.75  | 2.13  |
| BM184246                                                                                                | Tubulin folding cofactor B                                                                                                                                            | tbccl            | TBC      | -4.70 | -3.41 |
| BI984755                                                                                                | Tubulin-specific chaperone c-like                                                                                                                                     | tbcd             | TBCD     | 1.83  | 1.13  |
| AW232076                                                                                                | Tubulin-specific chaperone d                                                                                                                                          | tbp              | TBP      | 2.65  | 1.34  |
| BM184129                                                                                                | TATA box binding protein                                                                                                                                              | tbx15            | TBX15    | -0.72 | -4.07 |
| BM095827                                                                                                | T-box 15                                                                                                                                                              | tbx2b            | TBX2     | 0.44  | 3.27  |
| AF179405                                                                                                | T-box 2b                                                                                                                                                              | tbxas1           | TBXAS1   | -2.59 | 4.75  |
| AY398422                                                                                                | Thromboxane A synthase 1 (platelet, cytochrome P450, family 5, subfamily A)                                                                                           | tea2             | TCEA2    | -0.22 | -2.32 |
| BC046074                                                                                                | Transcription elongation factor A (SII), 2                                                                                                                            | par1             | TCF15    | 2.55  | -4.84 |
| AJ066310                                                                                                | Paraxis (transcription factor 15 (basic helix-loop-helix))                                                                                                            | tcf7             | TCF7     | 0.24  | 3.34  |
| AY825026                                                                                                | Transcription factor 7 (T-cell specific, HMG-box)                                                                                                                     | tcf7l2           | TCF7L2   | -0.95 | 2.46  |
| AF136455                                                                                                | Transcription factor 7-like 2 (T-cell specific, HMG-box)                                                                                                              | si:ch211-102e2.6 | TCN2     | 0.69  | -1.53 |
| AW019798                                                                                                | Transcobalamin II                                                                                                                                                     | wu:fc96g12       | TEAD3    | -1.73 | -1.33 |
| AI957669                                                                                                | Intergenic 3' to zgc:171784 : TEA domain family member 3 and 5' to LOC797914   similar to sphingomyelin phosphodiesterase 2                                           | tef              | TEF      | -4.47 | -0.26 |
| U43671                                                                                                  | Thyrotroph embryonic factor                                                                                                                                           | zgc:112180       | TEF      | -3.03 | -1.50 |
| BI842909                                                                                                | LOC553686 sim to thyrotrophic embryonic factor                                                                                                                        | tfa              | TF       | 0.84  | 3.58  |
| BI704253                                                                                                | Transferrin-a                                                                                                                                                         | tfap2a           | TFAP2A   | 1.40  | -1.50 |
| AI722745                                                                                                | Transcription factor AP-2 alpha                                                                                                                                       | tfap2c           | TFAP2C   | -2.12 | -1.48 |
| AW117076                                                                                                | Transcription factor AP-2 gamma (activating enhancer binding protein 2 gamma)                                                                                         | BM187021         | TFCP2    | 2.73  | 1.08  |
| BM187021                                                                                                | Intron of sic2h211-210e8.8 sim to TFCP2   transcription factor CP2                                                                                                    | wu:fc10e04       | TFCP2    | 1.70  | 0.90  |
| BI980047                                                                                                | Sim to transcription factor CP2                                                                                                                                       | tfcp2l1          | TFCP2L1  | 1.47  | 2.06  |
| BI867054                                                                                                | Transcription factor Dp-1, like                                                                                                                                       | tfcp2l2          | TFCP2L2  | -1.61 | 2.43  |
| AI974139                                                                                                | Transcription factor Dp-2 (E2F dimerization partner 2)                                                                                                                | trf2             | TRF2     | 2.00  | 3.20  |
| AY649365                                                                                                | Transferrin receptor 2                                                                                                                                                | tgfb1            | TGFB1    | 0.41  | 1.88  |
| AW566567                                                                                                | Transforming growth factor, beta 1                                                                                                                                    | tgfb2            | TGFB2    | 0.62  | 2.27  |
| AY338730                                                                                                | Transforming growth factor, beta 2                                                                                                                                    | tgfb3            | TGFB3    | -0.39 | 1.79  |
| AY614705                                                                                                | Transforming growth factor, beta 3                                                                                                                                    | tgfb1            | TGFB1    | 0.99  | 1.70  |
| AW018635                                                                                                | Transforming growth factor, beta-induced                                                                                                                              | tgfb2            | TGFB2    | -0.38 | 2.24  |
| AW203007                                                                                                | Transforming growth factor, beta receptor II                                                                                                                          | wu:tf64g10       | TGFB2    | 3.14  | 2.87  |
| AW305396                                                                                                | 3' end of DKKEY-101K6.5: sim to TGFB2: TGF-beta type II receptor and 3' end to DKKEY-101K6.4: sim to OSBPL1: oxysterol binding protein-like 11                        | BG306444         | TGM1     | -1.92 | -1.70 |
| Sim to transglutaminase 1 (K polypeptide epidermal type 1, protein-glutamine-gamma-glutamyltransferase) |                                                                                                                                                                       | th               | TH       | 0.39  | 2.62  |
| BG306444                                                                                                |                                                                                                                                                                       | thoc3            | THOC3    | -0.46 | -2.24 |
| AF075384                                                                                                | Tyrosine hydroxylase                                                                                                                                                  | thy1             | THY1     | 2.28  | 3.33  |
| BI888350                                                                                                | THO complex 3                                                                                                                                                         | tiaf1            | TIAF1    | 0.09  | 1.72  |
| BM181792                                                                                                | Thy-1 cell surface antigen (weak)                                                                                                                                     | tial1            | TIAL1    | 2.38  | 2.23  |
| AI477343                                                                                                | TGFB1-induced anti-apoptotic factor 1                                                                                                                                 | tie1             | TIE1     | 1.41  | 2.29  |
| AW344036                                                                                                | TIA1 cytotoxic granule-associated RNA binding protein-like 1                                                                                                          | AI965244         | TIMELESS | 1.55  | 0.39  |
| AF053633                                                                                                | Endothelium-specific receptor tyrosine kinase 1 (sim to tyrosine kinase with immunoglobulin-like and EGF-like domains 1)                                              | timm17a          | TIMM17A  | -2.35 | 0.83  |
| AI965244                                                                                                | Sim to timeless homolog (Drosophila)                                                                                                                                  | timp2            | TIMP2    | -3.97 | 0.50  |
| BE605781                                                                                                | Translocase of inner mitochondrial membrane 17 homolog A (yeast)                                                                                                      | tinf2            | TINF2    | 1.99  | 2.45  |
| AI332057                                                                                                | Tissue inhibitor of metalloproteinase 2                                                                                                                               | BI885944         | TJP3     | -1.82 | -0.61 |
| AW171093                                                                                                | TERF1 (TRF1)-interacting nuclear factor 2 (weak sim)                                                                                                                  | tk1              | TK1      | 2.80  | 2.76  |
| BI885944                                                                                                | Sim to tight junction protein 3 (zona occludens 3)                                                                                                                    | gro2             | MLE3     | -1.91 | -2.67 |
| BC044148                                                                                                | Thymidine kinase 1, soluble                                                                                                                                           | BI885570         | TLN1     | 1.71  | 2.68  |
| BM095334                                                                                                | Groucho 2 (sim to transducin-like enhancer of split 3 (E(spl) homolog)                                                                                                | tlr3             | TLR3     | 0.71  | 2.98  |
| BI885570                                                                                                | Sim to talin 2; 3' end of thl1                                                                                                                                        | wu:fc89e06       | TLR7     | 3.86  | -0.55 |
| BG304206                                                                                                | Toll-like receptor 3                                                                                                                                                  | tlx3b            | TLX3     | 3.18  | 0.94  |
| AI965294                                                                                                | Intron of tlr7   toll-like receptor 7                                                                                                                                 | tmed1b           | TMED1    | -2.04 | -1.10 |
| AF398519                                                                                                | T-cell leukemia, homeobox 3b                                                                                                                                          | zgc:85681        | TMED10   | 1.67  | 1.04  |
| Transmembrane emp24 protein transport domain containing 1b; interleukin 1 receptor-like 1 ligand        |                                                                                                                                                                       | tmed3            | TMED3    | 1.47  | 2.60  |
| AI877509                                                                                                |                                                                                                                                                                       | tmed9            | TMED9    | -1.72 | 0.93  |
| BI672201                                                                                                | Transmembrane emp24 domain-containing protein 10                                                                                                                      | LOC402976        | TMEM27   | -2.22 | -2.22 |
| BM035946                                                                                                | Transmembrane emp24 protein transport domain containing 3                                                                                                             | tmem37           | TMEM37   | -0.45 | -2.43 |
| AW344170                                                                                                | Transmembrane emp24 protein transport domain containing 9                                                                                                             | tmem38a          | TMEM38A  | -3.97 | -2.62 |
| BI880791                                                                                                | LOC402976 sim to transmembrane protein 27                                                                                                                             | zgc:55815        | TMEM38B  | 2.87  | 0.89  |
| BI428441                                                                                                | Transmembrane protein 37                                                                                                                                              | tmpo             | TMPO     | 1.92  | 2.34  |
| AW128379                                                                                                | Transmembrane protein 38A                                                                                                                                             | zgc:110551       | TMPO     | -1.83 | -1.44 |
| BC045460                                                                                                | LOC393145 sim to transmembrane protein 38B                                                                                                                            | LOC559754        | TMPRSS13 | -2.01 | -0.80 |
| AW116654                                                                                                | Thymopoietin                                                                                                                                                          | tmprss4b         | TMPRSS4  | -1.90 | -1.87 |
| AW058840                                                                                                | LOC553624 sim to thymopoietin                                                                                                                                         | tncc             | TNC      | 2.68  | 0.27  |
| BI878819                                                                                                | Sim to transmembrane protease, serine 13                                                                                                                              | DKKEY-183C23.1   | TNFAIP2  | 1.62  | 1.52  |
| BG729678                                                                                                | Transmembrane protease, serine 4b                                                                                                                                     | tnfaip8l         | TNFAIP8  | -1.38 | -1.72 |
| U14940                                                                                                  | Tenascin C                                                                                                                                                            | tnfrsf1a         | TNFRSF1A | -1.45 | -3.26 |
| BM096075                                                                                                | Weak sim to TNFAIP2   tumor necrosis factor, alpha-induced protein 2                                                                                                  | AA658585         | TNFRSF21 | -1.49 | -1.84 |
| BC053238                                                                                                | Tumor necrosis factor, alpha-induced protein 8, like                                                                                                                  | BE201526         | TNFRSF9  | 1.63  | 1.15  |
| AF250042                                                                                                | Tumor necrosis factor receptor superfamily, member a                                                                                                                  | tnfsf10l         | TNFSF10  | -1.23 | -2.25 |
| AA658585                                                                                                | 3' end of tnfrsf21   tumor necrosis factor receptor superfamily, member 21 and 5' to LOC799325 : weak sim to GPR110   G protein-coupled receptor 110                  | tnfsf104         | TNFSF10  | -3.23 | -1.89 |
| BE201526                                                                                                | 3' end of zgc:136557 : tumor necrosis factor receptor superfamily, member 9 and 5' to zgc:162431 weak sim to CCDC50   coiled-coil domain containing 50                | tnip1            | TNIP1    | -0.58 | 1.50  |
| AF250041                                                                                                | Tumor necrosis factor (ligand) superfamily, member 10 like                                                                                                            | tnks             | TNKS     | 2.87  | 1.48  |
| BC090312                                                                                                | Tumor necrosis factor (ligand) superfamily, member 10 like 4 (weak sim to tumor necrosis factor (ligand) superfamily, member 10)                                      |                  |          |       |       |
| BM156764                                                                                                | TNFAIP3 interacting protein 1                                                                                                                                         |                  |          |       |       |
| AW343766                                                                                                | Tankyrase, TRF1-interacting ankyrin-related ADP-ribose polymerase                                                                                                     |                  |          |       |       |

|           |                                                                                                                                                                                                                                                               |                   |          |       |       |
|-----------|---------------------------------------------------------------------------------------------------------------------------------------------------------------------------------------------------------------------------------------------------------------|-------------------|----------|-------|-------|
| BC071546  | LOC415175 sim to troponin C type 1 (slow)                                                                                                                                                                                                                     | zgc:86932         | TNNC1    | -1.70 | -1.26 |
| BC047857  | Troponin I, skeletal, fast 2a.2                                                                                                                                                                                                                               | ttni2a.2          | TNNI2    | -2.72 | -2.52 |
| A1964276  | Troponin I, skeletal, fast 2a.4                                                                                                                                                                                                                               | ttni2a.4          | TNNI2    | -2.29 | -1.33 |
| A1617763  | Troponin I, skeletal, fast 2b.2                                                                                                                                                                                                                               | ttni2b.2          | TNNI2    | -4.42 | -3.12 |
| BE693169  | Troponin T3b, skeletal, fast                                                                                                                                                                                                                                  | ttni3b            | TNNT3    | -7.69 | 0.57  |
| BI705660  | Target of myb1 (chicken)                                                                                                                                                                                                                                      | tom1              | TOM1     | 2.64  | 2.61  |
| BI671327  | 3' end of tomm70a   translocase of outer mitochondrial membrane 70 homolog A and 5' to tbc1d23   TBC1 domain family, member 23                                                                                                                                | wu:fc56e01        | TOMM70A  | -1.42 | -2.27 |
| BM156751  | Topoisomerase (DNA) II alpha                                                                                                                                                                                                                                  | top2a             | TOP2A    | -1.31 | -4.24 |
| BI867046  | Sim to TOPORS   topoisomerase I binding, arginine/serine-rich                                                                                                                                                                                                 | st:ch211-145b13.4 | TOPORS   | 0.96  | 1.71  |
| BC062843  | LOC393830 sim to torsin family 1, member A (torsin A)                                                                                                                                                                                                         | zgc:77727         | TOR1A    | 0.89  | -2.16 |
| BM183866  | LOC565062 sim to torsin family 1, member B (torsin B)                                                                                                                                                                                                         | LOC565062         | TOR1B    | -1.57 | -0.86 |
| U60804    | Tumor protein p53                                                                                                                                                                                                                                             | tp53              | TP53     | 2.47  | -3.54 |
| A1626138  | Tumor protein p53 binding protein, 2                                                                                                                                                                                                                          | tp53bp2           | TP53BP2  | 2.15  | -2.34 |
| BM005448  | Weak sim to tumor protein p53 inducible nuclear protein 1                                                                                                                                                                                                     | LOC555795         | TP53NP1  | 0.44  | -1.94 |
| AF412283  | Tumor protein p63                                                                                                                                                                                                                                             | tp63              | TP63     | -3.09 | 2.80  |
| BI890917  | Trophoblast glycoprotein-like                                                                                                                                                                                                                                 | tpbgl             | TPBG     | 0.81  | 2.29  |
| BI882446  | Tumor protein D52-like 2                                                                                                                                                                                                                                      | tpd52l2           | TPD52L2  | 2.00  | 2.08  |
| BG303492  | Tryptophan hydroxylase 1b                                                                                                                                                                                                                                     | tp1b              | TPH1     | 0.85  | -3.45 |
| AF387820  | Triosephosphate isomerase 1a                                                                                                                                                                                                                                  | tpi1a             | TP11     | -4.17 | -6.12 |
| A1588611  | Tropomyosin 1 (alpha)                                                                                                                                                                                                                                         | tpm1              | TPM1     | -4.86 | -1.70 |
| AF180892  | Alpha-tropomyosin                                                                                                                                                                                                                                             | tpma              | TPM1     | -3.35 | -1.88 |
| AW455045  | Tropomyosin 4                                                                                                                                                                                                                                                 | tpm4              | TPM4     | -2.07 | 0.79  |
| AW344264  | Translocated promoter region (to activated MET oncogene) (nuclear pore complex-associated protein TPR)                                                                                                                                                        | tptr              | TPR      | 3.28  | 4.94  |
| AF204241  | Tyrosylprotein sulfotransferase 1                                                                                                                                                                                                                             | tpst1             | TPST1    | 0.27  | 2.77  |
| AF288217  | Translocationally controlled tumor protein                                                                                                                                                                                                                    | tcp               | TPT1     | -1.70 | 2.49  |
| BI672829  | Weak sim to Targeting protein for Xklp2 (Restricted expression proliferation-associated protein 100) (p100) (Differentially expressed in cancerous and non-cancerous lung cells 2) (DIL-2) (Protein IIs353) (Hepatocellular carcinoma-associated antigen 519) | sinup             | TPX2     | -2.00 | -3.47 |
| BM026054  | Transcribed locus Repeats in BACs sim to T cell receptor alpha locus                                                                                                                                                                                          | BM026054          | TRA@     | -1.55 | -2.29 |
| NM_131607 | Tnfrsf1a-associated via death domain                                                                                                                                                                                                                          | tradd             | TRADD    | -0.72 | -2.12 |
| A1667210  | Tnf receptor-associated factor 2b                                                                                                                                                                                                                             | traf2b            | TRAF2    | 1.77  | -0.40 |
| BI709770  | TRAF-interacting protein                                                                                                                                                                                                                                      | traip             | TRAP     | -0.93 | -2.97 |
| AW281809  | 3' end of LOC100001887 sim to TRAK1   trafficking protein, kinesin binding 1 and ' to zgc:110712 Krl4 or Krl20                                                                                                                                                | AW281809          | TRAK1    | -2.23 | -1.12 |
| AW116159  | Translocating chain-associating membrane protein 1                                                                                                                                                                                                            | tram1             | TRAM1    | 3.37  | 2.24  |
| BC083391  | Trapping chain-particle complex 6b                                                                                                                                                                                                                            | trappc6b          | TRAPPC6B | -3.36 | -1.19 |
| BC068383  | Trapping chain-particle complex 6b-like                                                                                                                                                                                                                       | trappc6bl         | TRAPPC6B | 4.12  | -2.48 |
| AB196920  | tRNA aspartic acid methyltransferase 1                                                                                                                                                                                                                        | trdm1t            | TRDM1T   | -1.90 | -2.96 |
| BI891984  | LOC565972 weak sim to tripartite motif-containing 16                                                                                                                                                                                                          | st:dkcy-7b17.2    | TRIM16   | -1.74 | -1.37 |
| BI867009  | LOC692298 weak sim to tripartite motif-containing 16                                                                                                                                                                                                          | zgc:136585        | TRIM16   | -2.14 | -0.93 |
| AW059436  | Weak sim to Tripartite motif-containing protein 35 (Hemopoietic lineage switch protein 5)                                                                                                                                                                     | LOC799694         | TRIM35   | -2.37 | -1.77 |
| BC091879  | LOC541547 weak sim to tripartite motif-containing 35                                                                                                                                                                                                          | zgc:113250        | TRIM35   | -1.59 | -1.84 |
| BC049414  | LOC394070 sim to tripartite motif-containing 54                                                                                                                                                                                                               | zgc:56376         | TRIM54   | -2.96 | -1.73 |
| AY677196  | Transient receptor potential cation channel, subfamily A, member 1a                                                                                                                                                                                           | trpa1a            | TRPA1    | 4.29  | 4.41  |
| AA947276  | Transient receptor potential cation channel, subfamily C, member 4 associated protein b                                                                                                                                                                       | trpc4apb          | TRPC4AP  | 3.20  | -1.06 |
| AY974804  | Transient receptor potential cation channel, subfamily C, member 2                                                                                                                                                                                            | trpc2             | TRPC7    | 1.85  | 2.21  |
| BQ092359  | Intergenic 3' to LOC792324 sim to ASCC1   activating signal cointegrator 1 complex subunit 1 and 5' to LOC799255 sim to gag-like protein probably intron of TRPS1   trichorhinophalangeal syndrome 1                                                          | BQ092359          | TRPS1    | 2.16  | -0.57 |
| BC095056  | LOC553550 sim to tRNA splicing endonuclease 54 homolog (S. cerevisiae)                                                                                                                                                                                        | zgc:109927        | TSEN54   | -0.52 | -2.28 |
| AW203163  | Tetraspan 2                                                                                                                                                                                                                                                   | zgc:110586        | TSPAN2   | -1.33 | -1.96 |
| BM183928  | Sarcoma amplified sequence; sim to TSPAN31: tetraspanin 31                                                                                                                                                                                                    | sas               | TSPAN31  | 1.16  | 2.28  |
| BM024328  | Tetraspanin 7b                                                                                                                                                                                                                                                | tspan7b           | TSPAN7   | -2.06 | -1.23 |
| A1666975  | Tissue specific transplantation                                                                                                                                                                                                                               | zgc:100864        | TSTA3    | -2.98 | -1.73 |
| BI878949  | Titin a                                                                                                                                                                                                                                                       | ttna              | TTN      | -3.82 | 4.85  |
| A1354069  | Titin-like                                                                                                                                                                                                                                                    | ttnl              | TTN      | -2.44 | -0.97 |
| BM025895  | Tocopherol (alpha) transfer protein (ataxia (Friedreich-like) with vitamin E deficiency)                                                                                                                                                                      | tpa               | TPA      | 4.58  | 2.25  |
| BI889398  | Weak sim to transylretin                                                                                                                                                                                                                                      | LOC570474         | TTR      | 2.27  | 2.55  |
| CN173753  | Transylretin (prealbumin, amyloidosis type 1)                                                                                                                                                                                                                 | trr               | TTR      | 7.17  | 5.38  |
| BM036121  | Traf and tnfr receptor associated protein                                                                                                                                                                                                                     | ttap              | TTRAP    | 0.56  | -2.21 |
| A1204734  | Sim to Danio rerio cDNA clone IMAGE:7137547 contain repeat 5' end to sim to TUBA1A                                                                                                                                                                            | A1204734          | TUBA1A   | 3.30  | 1.07  |
| BI673660  | Tubulin, alpha 7 like                                                                                                                                                                                                                                         | tuba7l            | TUBA1A   | -2.96 | -2.29 |
| BE017692  | Tubulin, alpha 8 like 2                                                                                                                                                                                                                                       | tuba8l2           | TUBA1B   | -1.90 | 3.65  |
| BI982778  | LOC767746 sim to beta-tubulin                                                                                                                                                                                                                                 | zgc:153426        | TUBB     | -4.31 | -2.32 |
| BI883931  | 3' end of tubd1: tubulin, delta 1                                                                                                                                                                                                                             | BI883931          | TUBD1    | 1.45  | 1.68  |
| BI980399  | Tumor suppressor candidate 4                                                                                                                                                                                                                                  | tusc4             | TUSC4    | 5.98  | 4.67  |
| BC074070  | Twinfilin, actin-binding protein, homolog 1b                                                                                                                                                                                                                  | twflb             | TWF1     | 3.34  | -0.85 |
| CN317747  | Thioredoxin domain containing 17                                                                                                                                                                                                                              | txndc17           | TXNDC17  | 2.63  | -1.64 |
| A1793730  | Thioredoxin domain containing 5                                                                                                                                                                                                                               | txndc5            | TXNDC5   | 0.17  | 2.06  |
| AY005804  | Thymidylate synthase                                                                                                                                                                                                                                          | tyms              | TYMS     | -1.66 | -3.28 |
| A1958574  | Intergenic 3' to LOC565006 sim to UACA   uveal autoantigen with coiled-coil domains and ankyrin repeats and 5' to go2: groucho 2                                                                                                                              | A1958574          | UACA     | 0.80  | 1.84  |
| BQ074792  | Sim to ubiquitin-like modifier activating enzyme 1                                                                                                                                                                                                            | LOC100001302      | UBA1     | 4.02  | -1.07 |
| A1959564  | Ubiquitin-like modifier activating enzyme 1                                                                                                                                                                                                                   | uba1              | UBA1     | 2.74  | -2.54 |
| AW116617  | Sim to ubiquitin-like modifier activating enzyme 2                                                                                                                                                                                                            | AW116617          | UBA2     | -2.89 | -2.22 |
| BI984826  | Ubiquitin-like modifier activating enzyme 5                                                                                                                                                                                                                   | uba5              | UBA5     | 2.15  | 2.18  |
| BG302714  | Intergenic 3' to st:dkcy-1o2.1 sim to UBAC1   UBA domain containing 1 and 5' to DKEY-56D12.1 sim to MSH3   mutS homolog 3                                                                                                                                     | BG302714          | UBAC1    | -2.14 | -0.70 |
| BI866338  | LOC777766 sim to ubiquitin C                                                                                                                                                                                                                                  | zgc:153686        | UBC      | 2.38  | 2.35  |
| BM072375  | Ubiquitin-conjugating enzyme E2D 2 (UBC4/5 homolog, yeast)                                                                                                                                                                                                    | ube2d2            | UBE2D2   | -0.16 | 1.89  |
| BI879262  | Ubiquitin-conjugating enzyme E2E 3 (UBC4/5 homolog, yeast)                                                                                                                                                                                                    | ube2e3            | UBE2E3   | 0.12  | 1.57  |
| BM181650  | Ubiquitin-conjugating enzyme E2G 1                                                                                                                                                                                                                            | ube2g1            | UBE2G1   | -1.18 | 3.74  |
| AW175187  | Ubiquitin-conjugating enzyme E2G 2                                                                                                                                                                                                                            | ube2g2            | UBE2G1   | 2.28  | 1.65  |
| AW154232  | Ubiquitin-conjugating enzyme E2H (UBC8 homolog, yeast)                                                                                                                                                                                                        | ube2h             | UBE2H    | 1.38  | 3.71  |
| A1641713  | Ubiquitin-conjugating enzyme E2L 3                                                                                                                                                                                                                            | ube2l3            | UBE2L3   | -0.26 | 3.12  |
| BC095212  | Ubiquitin-conjugating enzyme E2Q (putative) 1                                                                                                                                                                                                                 | ube2q1            | UBE2Q2   | 1.84  | 2.76  |
| A1204792  | Intron of zgc:114060 ubiquitin-conjugating enzyme E2S                                                                                                                                                                                                         | A1204792          | UBE2S    | 0.90  | -1.60 |
| BF938814  | Ubiquitin protein ligase E3C                                                                                                                                                                                                                                  | ube3c             | UBE3C    | 1.76  | 0.39  |
| BI877821  | Ataxin-1 ubiquitin-like interacting protein                                                                                                                                                                                                                   | ubin              | UBQLN1   | 0.18  | 2.53  |
| BM185181  | Ubiquitin carboxyl-terminal esterase L1 (ubiquitin thioesterase)                                                                                                                                                                                              | uchl1             | UCHL1    | -3.14 | -4.60 |
| AJ243250  | Uncoupling protein 2                                                                                                                                                                                                                                          | ucp2              | UCP2     | -2.28 | 0.43  |
| BC053173  | Uncoupling protein 2, like                                                                                                                                                                                                                                    | ucp2l             | UCP2     | -4.76 | -2.43 |
| BF156623  | Uncoupling protein 4                                                                                                                                                                                                                                          | ucp4              | UCP3     | 2.59  | 4.96  |
| BC078313  | LOC445225 sim to UEV and lactate/malate dehydrogenase domains                                                                                                                                                                                                 | zgc:100959        | UEVLD    | -2.01 | 0.95  |
| BC076020  | Ubiquitin fusion degradation 1-like                                                                                                                                                                                                                           | ufd1l             | UFD1L    | -0.37 | -1.96 |
| AW116285  | Ubiquitin-fold modifier 1                                                                                                                                                                                                                                     | ubfm1             | UFM1     | -2.13 | -1.72 |
| BF717454  | UDP glucuronosyltransferase 1 family a, b                                                                                                                                                                                                                     | ugt1ab            | UGT1A6   | 1.46  | -2.07 |
| A1522542  | Intron of zgc:153634 sim to UGT2A1   UDP glucuronosyltransferase 2 family, polypeptide A1                                                                                                                                                                     | A1522542          | UGT2A1   | 2.86  | -0.68 |
| A1545978  | LOC550352 sim to UDP glucuronosyltransferase 2 family, polypeptide A1                                                                                                                                                                                         | zgc:112491        | UGT2A1   | 7.97  | 2.42  |
| AW127886  | LOC767756 Sim to UDP glucuronosyltransferase                                                                                                                                                                                                                  | zgc:153634        | UGT2A1   | 1.48  | -2.26 |
| BM104057  | Uracil-DNA glycosylase                                                                                                                                                                                                                                        | ung               | UNG      | 0.32  | -5.60 |
| BI888708  | Signal peptide peptidase 3                                                                                                                                                                                                                                    | sppl3             | UNQ1887  | -1.90 | -0.35 |
| A1544884  | Ureidopropionase, beta                                                                                                                                                                                                                                        | upb1              | UPB1     | 1.57  | 4.42  |
| BC044525  | Uridine phosphorylase 2                                                                                                                                                                                                                                       | upp2              | UPP2     | -3.24 | 2.39  |
| A1437412  | Ubiquinol-cytochrome c reductase core protein II                                                                                                                                                                                                              | zgc:92453         | UQCRC2   | -1.54 | -0.87 |
| AW420002  | LOC556744 sim to UROC1 urocanase domain containing 1                                                                                                                                                                                                          | zgc:194768        | UROC1    | 2.45  | -0.60 |
| AW466607  | Ubiquitin specific protease 11-like                                                                                                                                                                                                                           | DKEY-181C21.2     | USP11    | 1.62  | -1.74 |
| BG303320  | 3' end of LOC558397: sim to Ubiquitin carboxyl-terminal hydrolase 13 (Ubiquitin thioesterase 13) (Ubiquitin-specific-processing protease 13) (Deubiquitinating enzyme 13)                                                                                     | BG303320          | USP13    | -2.32 | -1.53 |

|          |                                                                                                                                                                               |                   |          |       |       |
|----------|-------------------------------------------------------------------------------------------------------------------------------------------------------------------------------|-------------------|----------|-------|-------|
| BI878085 | (Isopeptidase T-3) (ISOT-3)                                                                                                                                                   | usp14             | USP14    | -0.70 | 2.22  |
| BI880724 | Ubiquitin specific protease 14 (tRNA-guanine transglycosylase)                                                                                                                | zgc:92134         | USP2     | -2.27 | 0.53  |
| BI880068 | LOC494031 sim to ubiquitin specific peptidase 2                                                                                                                               | usp24             | USP24    | -0.39 | 2.55  |
| BI887079 | Ubiquitin specific peptidase 24. LOC100149597                                                                                                                                 | usp9              | USP9X    | 0.39  | 2.41  |
| AI964232 | Sim to UTP20   UTP20, small subunit (SSU) processome component, homolog                                                                                                       | im:7159098        | UTP20    | -1.73 | 0.71  |
| AY279079 | Vang-like 1 (van gogh, Drosophila)                                                                                                                                            | vangl1            | VANGL1   | 1.14  | 1.95  |
| AA606013 | VAMP (vesicle-associated membrane protein)-associated protein A                                                                                                               | vapa              | VAPA     | 1.69  | 2.48  |
| BI673936 | Intron of wu:fk86g1 sim to VAV3   vav 3 guanine nucleotide exchange factor and 5' to sh3glb1 SH3-domain GRB2-like endophilin B1                                               | BI673936          | VAV3     | 1.68  | -1.24 |
| BE201171 | Vav 3 guanine nucleotide exchange factor                                                                                                                                      | wu:fk86g11        | VAV3     | 1.76  | 2.58  |
| BG303991 | Intergenic 3' to sc:40202 and 5' to LOC100003052                                                                                                                              | BG303991          | VCAM1    | 6.63  | 2.05  |
| AW344246 | Vascular cell adhesion molecule 1-like                                                                                                                                        | zgc:158875        | VCAM1    | 1.92  | 3.08  |
| BI892394 | Voltage-dependent anion channel 2                                                                                                                                             | vdac2             | VDAC2    | -1.85 | -1.21 |
| AF466147 | Vascular endothelial growth factor c                                                                                                                                          | vegfc             | VEGFC    | -0.29 | 2.24  |
| AF069994 | Vimentin                                                                                                                                                                      | vim               | VIM      | -2.23 | -0.76 |
| AI626761 | Sim to vitamin K epoxide reductase complex, subunit 1-like                                                                                                                    | wu:fc03a11        | VKORC1L1 | 3.36  | 2.71  |
| BI705594 | Very low density lipoprotein receptor                                                                                                                                         | vldlr             | VLDLR    | 2.15  | -5.03 |
| BC049319 | Vaccinia related kinase 2                                                                                                                                                     | vrk2              | VRK2     | 2.64  | 0.31  |
| AI331200 | LOC796658 weak sim to VTCN1   V-set domain containing T cell activation inhibitor 1                                                                                           | si:key-169i5.4    | VTCN1    | -0.77 | -1.52 |
| BC095724 | Vitronectin a                                                                                                                                                                 | vtna              | VTN      | 3.11  | 2.60  |
| BM096343 | Vitronectin b                                                                                                                                                                 | vtnb              | VTN      | 3.22  | 4.14  |
| BI890241 | WD repeat domain 33                                                                                                                                                           | wdr33             | WDR33    | 3.76  | 0.32  |
| BI886163 | LOC393506 sim to WD repeat domain 77                                                                                                                                          | zgc:65780         | WDR77    | -1.78 | -0.46 |
| AI959228 | WD repeat domain containing 82                                                                                                                                                | wdr82             | WDR82    | -0.72 | -1.86 |
| AI957865 | Wolf-Hirschhorn syndrome candidate 1                                                                                                                                          | whsc1             | WHSC1    | -3.25 | -3.62 |
| AF122925 | Wnt inhibitory factor 1                                                                                                                                                       | wif1              | WIF1     | 0.62  | -2.16 |
| BC053306 | WD repeat domain, phosphoinositide interacting 1                                                                                                                              | wipil             | WIP1     | 1.99  | -0.49 |
| BC066432 | Wingless-type MMTV integration site family, member 16                                                                                                                         | wnt16             | WNT16    | 2.71  | 1.73  |
| AF544026 | Wingless-type MMTV integration site family, member 2B                                                                                                                         | wnt2b             | WNT2B    | 0.23  | 1.82  |
| AF139536 | Wingless-type MMTV integration site family, member 4b                                                                                                                         | wnt4b             | WNT4     | 0.93  | 2.22  |
| UI0869   | Wingless-type MMTV integration site family, member 8a                                                                                                                         | wnt8a             | WNT8A    | 0.27  | -2.00 |
| AI397280 | Intergenic 3' to wnt9a   wingless-type MMTV integration site family, member 9A and 3' to keep1a kelch-like ECH-associated protein 1a                                          | wu:fb09c09        | WNT9A    | -1.08 | -2.50 |
| X85735   | Wilms tumor 1a                                                                                                                                                                | wt1a              | WT1      | 1.70  | 2.09  |
| BM104374 | WW domain containing oxidoreductase                                                                                                                                           | wwox              | WWOX     | 1.32  | 1.70  |
| BG728392 | Cardiomyopathy associated 1 (weak sim to xin actin-binding repeat containing 2)                                                                                               | cmya1             | XIRP2    | 0.85  | -2.06 |
| BQ260844 | Xeroderma pigmentosum, complementation group C                                                                                                                                | xpc               | XPC      | 2.90  | -2.36 |
| AA497185 | X-prolyl aminopeptidase (aminopeptidase P) 1, soluble                                                                                                                         | xpnpep1           | XPNPPE1  | 2.01  | 0.82  |
| BI704306 | 5'-3' exoribonuclease 2                                                                                                                                                       | xrn2              | XRN2     | 0.96  | -2.38 |
| BE201596 | Yes-associated protein 1                                                                                                                                                      | si:ch211-181p1.5  | YAP1     | -1.94 | 1.02  |
| AF093129 | Y box binding protein 1                                                                                                                                                       | ybx1              | YBX1     | -2.20 | 1.18  |
| BC076436 | YEATS domain containing 4                                                                                                                                                     | yeats4            | YEATS4   | 0.65  | 2.57  |
| AW127946 | Sim to YME1L1   YME1-like 1                                                                                                                                                   | LOC793098         | YME1L1   | 1.79  | -0.37 |
| BM171814 | Yippee-like 3                                                                                                                                                                 | yipel3            | YPEL3    | 1.71  | -2.93 |
| BC053247 | Tyrosine 3-monooxygenase/tryptophan 5-monooxygenase activation protein, beta polypeptide 2                                                                                    | ywhab2            | YWHAB    | 1.60  | 2.33  |
| BM024808 | 3-monooxygenase/tryptophan 5-monooxygenase activation protein, gamma polypeptide 2                                                                                            | ywhag2            | YWHAG    | -1.66 | -1.52 |
| AW202701 | Tyrosine 3-monooxygenase/tryptophan 5-monooxygenase activation protein, iota polypeptide                                                                                      | ywhai             | YWHAZ    | -2.79 | -1.69 |
| BI890446 | YY1 transcription factor a                                                                                                                                                    | yy1a              | YY1      | -2.39 | 1.31  |
| BI982056 | LOC560615 sim to similar to Zinc finger and BTB domain containing 16                                                                                                          | LOC560615         | ZBTB16   | -1.19 | -2.22 |
| BI706995 | Sim to ZBTB17   zinc finger and BTB domain containing 17                                                                                                                      | LOC564967         | ZBTB17   | 0.55  | -1.98 |
| AI626609 | Zinc finger and BTB domain containing 2b                                                                                                                                      | zbtb2b            | ZBTB2    | -2.47 | -1.84 |
| AW116298 | Zinc finger, DHHC-type containing 13                                                                                                                                          | zdhhc13           | ZDHHC13  | -1.15 | 2.26  |
| AJ249490 | Ch1 (sim to zinc finger protein 36, C3H type-like 2)                                                                                                                          | chl1              | ZFP36L2  | -0.84 | -5.76 |
| AI723133 | Zinc finger, FYVE domain containing 26                                                                                                                                        | zfyye26           | ZFYVE26  | -1.72 | -0.78 |
| AW510252 | Weak sim to ZHX2   zinc fingers and homeoboxes 2                                                                                                                              | wu:fk11d03        | ZHX2     | -1.88 | -0.41 |
| AI641415 | Zinc finger protein Zic6 (sim to Zic family member 1 (odd-paired homolog, Drosophila))                                                                                        | zic6              | ZIC1     | 0.54  | -2.43 |
| BE693149 | Sim to Zic family member 2 (odd-paired homolog, Drosophila)                                                                                                                   | BE693149          | ZIC2     | -1.14 | -1.86 |
| BM182229 | Zic family member 5 (odd-paired homolog, Drosophila)                                                                                                                          | zic5              | ZIC5     | -2.93 | -2.03 |
| BI890247 | Zinc metalloproteinase (STE24 homolog, S. cerevisiae)                                                                                                                         | zmpste24          | ZMPSTE24 | 1.32  | 2.13  |
| BC091788 | LOC100126120 sim to zinc finger protein 235                                                                                                                                   | zgc:173726        | ZNF235   | 2.80  | 1.87  |
| BM072263 | 3' end of si:ch211-221n23.1 sim to ZNF238: zinc finger protein 238 and 5' to LOC560549: sim to AKT3   v-akt murine thymoma viral oncogene homolog 3 (protein kinase B, gamma) | BM072263          | ZNF238   | -1.77 | -2.13 |
| BE200843 | Weak sim to ZNF551   zinc finger protein 551 (partially)                                                                                                                      | si:ch211-106b4.12 | ZNF551   | -1.63 | -1.91 |
| CK706206 | Sim to zinc finger protein 567                                                                                                                                                | LOC568921         | ZNF567   | 2.96  | -0.75 |
| AF157109 | Draclun sim to zinc finger protein 569                                                                                                                                        | drl               | ZNF569   | -2.48 | -0.19 |
| BC092159 | LOC548342 sim to zinc finger protein 569                                                                                                                                      | zgc:113209        | ZNF569   | -1.99 | 1.62  |
| CV487580 | Sim to ZNF585B   zinc finger protein 585B                                                                                                                                     | LOC799404         | ZNF585B  | 3.28  | 1.07  |
| BC096910 | LOC569258 sim to ZNF678   zinc finger protein 678                                                                                                                             | zgc:113372        | ZNF678   | -1.50 | 1.26  |
| AF222996 | Zinc finger protein 703                                                                                                                                                       | znf703            | ZNF703   | -1.33 | -2.49 |
| AI884171 | Sim to zinc finger protein 708                                                                                                                                                | wu:fc74g06        | ZNF708   | 1.54  | 1.32  |
| AI545215 | Intergenic 3' to CH211-255F4.8 sim to ZNF729   zinc finger protein 729 and 5' to CH211-255F4.12 sim to ZNF135   zinc finger protein 135                                       | AI545215          | ZNF729   | 2.10  | 0.63  |
| BI880278 | LOC564210 sim to zinc finger protein 76 (expressed in testis)                                                                                                                 | zgc:153635        | ZNF76    | 2.14  | 0.76  |
| BC092919 | Zinc finger-like gene 2a                                                                                                                                                      | znfl2a            | ZNF778   | -2.22 | -5.43 |
| BI980550 | LOC503597: sim to ZNF782: zinc finger protein 782                                                                                                                             | zgc:110821        | ZNF782   | 2.77  | 0.71  |
| AI957416 | Intron of si:ch211-215c3.2 sim to ZNF827   zinc finger protein 827                                                                                                            | AI957416          | ZNF827   | -1.76 | 1.25  |
