# Supplementary material for: A high level of liver-specific expression of oncogenic KrasV12 drives robust liver tumorigenesis in transgenic zebrafish
Source: PubMed Central journal article supplement — Dis Model Mech. 2011 Jul 4;4(6):801–13. doi: 10.1242/dmm.007831 (PMC3209649; doi:10.1242/dmm.007831), 2011-07-04
Supplement: supp_007831_DMM007831TableS2.pdf [file supp_007831_DMM007831TableS2.pdf]

**Table S2. Statistically enriched human gene sets (NES  $\geq 1.5$ , nominal enrichment p-value  $\leq 0.05$  and FDR q-value  $\leq 0.25$ ) representing biological processes and pathways in zebrafish liver hyperplasia and carcinoma identified by GSEA. The up- or down-regulated activity of a gene set is defined respectively by positive or negative values of NES. The list of genes in each significantly enriched gene set that contributed most to the enrichment results in hyperplasia and carcinoma are also listed. Within these gene lists, genes having  $\log_2$  fold-change  $\geq 1.5$  and FDR-adjusted p-value  $\leq 0.01$  are underlined and these are termed as zebrafish enriched genes.**

| Zebrafish liver hyperplasia (3 months) |              | Enriched GO gene sets (NES $\geq 1.5$ , NOM $p$ -value $\leq 0.05$ and FDR $q$ -value $\leq 0.25$ ) in zebrafish liver hyperplasia (3 months)                                                                                                                                                                                                                                                                                                                                                                                                                                                                                                                                                                         | Enriched gene lists                                                                                                                                                                                                                                                                                                                                                                                                                                                                                                                                                                                                                                                                                                                                                                                                                                                                                                                                                                                                                                                                                                                                                                                                                                                                                                                                                                                                                                                                                                                                                                                                                                                                                                                                                                                                                                                                                                                                                                              |
|----------------------------------------|--------------|-----------------------------------------------------------------------------------------------------------------------------------------------------------------------------------------------------------------------------------------------------------------------------------------------------------------------------------------------------------------------------------------------------------------------------------------------------------------------------------------------------------------------------------------------------------------------------------------------------------------------------------------------------------------------------------------------------------------------|--------------------------------------------------------------------------------------------------------------------------------------------------------------------------------------------------------------------------------------------------------------------------------------------------------------------------------------------------------------------------------------------------------------------------------------------------------------------------------------------------------------------------------------------------------------------------------------------------------------------------------------------------------------------------------------------------------------------------------------------------------------------------------------------------------------------------------------------------------------------------------------------------------------------------------------------------------------------------------------------------------------------------------------------------------------------------------------------------------------------------------------------------------------------------------------------------------------------------------------------------------------------------------------------------------------------------------------------------------------------------------------------------------------------------------------------------------------------------------------------------------------------------------------------------------------------------------------------------------------------------------------------------------------------------------------------------------------------------------------------------------------------------------------------------------------------------------------------------------------------------------------------------------------------------------------------------------------------------------------------------|
|                                        | Up-regulated | <p>BLOOD_COAGULATION<br/>CELL_CYCLE_ARREST_GO_0007050<br/>CHEMICAL_HOMEOSTASIS</p> <p>COAGULATION<br/>DNA_METABOLIC_PROCESS</p> <p>DNA_REPAIR</p> <p>DNA_REPLICATION</p> <p>ESTABLISHMENT_OF_LOCALIZATION</p> <p>HEMOSTASIS<br/>HOMEOSTATIC_PROCESS</p> <p>IMMUNE_SYSTEM_PROCESS</p> <p>LIPID_METABOLIC_PROCESS</p> <p>LIPID_TRANSPORT</p> <p>NEGATIVE_REGULATION_OF_MULTICELLULAR_ORGANISMAL_PROCESS<br/>REGULATION_OF_ANATOMICAL_STRUCTURE_MORPHOGENESIS<br/>REGULATION_OF_BODY_FLUID_LEVELS<br/>REGULATION_OF_RNA_METABOLIC_PROCESS</p> <p>REGULATION_OF_TRANSCRIPTION_DNA_DEPENDENT</p> <p>RESPONSE_TO_DNA_DAMAGE_STIMULUS</p> <p>RESPONSE_TO_ORGANIC_SUBSTANCE<br/>RESPONSE_TO_WOUNDING</p> <p>WOUND_HEALING</p> | <p>F10, F2, F7, F9, LMAN1, PLG, PROC<br/>CUL5, GADD45A, NBN, NOTCH2, PPM1G, TP53<br/>AIFM3, ANGPTL3, APOA1, APOA4, APOE, BAX, BCL2, CALCB, CALR, CLCN3, CP, DERL1, EDNRA, NPC2, RHCG, SLC40A1, SOD1, SRI, TFR2, THY1<br/>F10, F2, F7, F9, LMAN1, PLG, PROC<br/>BAX, DDB1, GADD45A, IGF1, KIN, MCM2, MCM3, MCM5, MRE11A, MSH2, MSH6, NBN, ORC3L, POLA1, POLB, POLD2, POLE2, RAD51, RAD52, RFC3, RUVBL2, SOD1, SUMO1, TINF2, TP53, XPC<br/>DDB1, GADD45A, MRE11A, MSH2, MSH6, NBN, POLA1, POLE2, RAD51, RAD52, RFC3, RUVBL2, SOD1, SUMO1, TP53, XPC<br/>IGF1, KIN, MCM2, MCM3, MCM5, MRE11A, MSH2, MSH6, NBN, ORC3L, POLA1, POLB, POLD2, POLE2, RAD51, RFC3, ABCB11, ABCD3, AGXT, AHSG, APOA1, APOA4, APOE, AQP9, ARCN1, AVP, BAX, C3orf31, CALR, CEL, CHKA, COX17, DERL1, DPH3, EDNRA, F2<br/>F10, F2, F7, F9, LMAN1, PLG, PROC<br/>AIFM3, APOA1, APOA4, APOE, BAX, BCL2, CALCB, CALR, CLCN3, CP, DERL1, EDNRA, GPX1, LDB1, MAFB, PCDH15, RHCG, SLC40A1, SOD1, SRI, TFR2, THY1<br/>APOA1, APOA4, AQP9, CTSW, FYN, LDB1, NFIL3, NOTCH2, MAFB, OPRK1<br/>ACAD8, ACAD5, ACAT2, ACOX3, ANGPTL3, APOA1, APOA4, CEL, CHKA, CYP11A1, CYP2J2, ECHS1, EDF1, GPX4, HACL1, HA01, HSD11B2, LPL, MTTP, NPC2, NR2F2, PECL, PI4KB, PLTP, PPARD<br/>ABCD3, ANGPTL3, APOA1, APOA4, APOE, CHKA, GOT2, NPC2, PPARD<br/>AHSG, F2, PROC, SOD1, THY1<br/><br/>APOE, FGD1, MAPT, ROBO1, ROBO2, THY1<br/>CEL, F10, F2, F7, F9, LMAN1, PLG, PROC<br/>ARNTL, ATF5, CALR, EDF1, ESR2, GATA6, HIRA, HSBP1, JUNB, LDB1, MAFA, MDFIC, MDM2, MTF1, NARG1, NEUROG1, NFKB2, NFYA, NKX2-5, NME2, NOTCH2<br/>ARNTL, ATF5, CALR, EDF1, ESR2, GATA6, HIRA, HSBP1, JUNB, LDB1, MAFA, MDFIC, MDM2, MTF1, NARG1, NEUROG1, NFKB2, NFYA, NKX2-5, NME2, NOTCH2, NR2F2<br/>DDB1, GADD45A, MRE11A, MSH2, MSH6, NBN, POLA1, POLE2, RAD51, RAD52, RFC3, RUVBL2, SOD1, SUMO1, TP53, XPC<br/>AQP9, BCL2, GOT2, MAFA, SOD1<br/>AHSG, CDO1, F10, F2, F7, F9, LMAN1, NMI, PLG, PROC, RTN4RL1, SOD1<br/>F10, F2, F7, F9, LMAN1, PLG, PROC, RTN4RL1</p> |

|                          |                                                                                                                                                       |                                                                                                                                                                                                                                                                                                                                                                                                                                                                                                                                                                                                                                                                                                                                                                                                  |                                                                                                                                                                                                                                                                                                                                                                                                                                                                                                                                                                                                                                                                                                                                                                                                                                                                                                                                                                                                                                                                                                                                                                                                                                                                                                                                                                                                                                                                                                                                                                                                                                                                                                                                                                                                                                                                                                                                                                                                                                                                                                                                                                                                                                                                                                                                                                                                                                                                                                                                                                                                                                                                                                                                                                                                                                                                                                                                       |
|--------------------------|-------------------------------------------------------------------------------------------------------------------------------------------------------|--------------------------------------------------------------------------------------------------------------------------------------------------------------------------------------------------------------------------------------------------------------------------------------------------------------------------------------------------------------------------------------------------------------------------------------------------------------------------------------------------------------------------------------------------------------------------------------------------------------------------------------------------------------------------------------------------------------------------------------------------------------------------------------------------|---------------------------------------------------------------------------------------------------------------------------------------------------------------------------------------------------------------------------------------------------------------------------------------------------------------------------------------------------------------------------------------------------------------------------------------------------------------------------------------------------------------------------------------------------------------------------------------------------------------------------------------------------------------------------------------------------------------------------------------------------------------------------------------------------------------------------------------------------------------------------------------------------------------------------------------------------------------------------------------------------------------------------------------------------------------------------------------------------------------------------------------------------------------------------------------------------------------------------------------------------------------------------------------------------------------------------------------------------------------------------------------------------------------------------------------------------------------------------------------------------------------------------------------------------------------------------------------------------------------------------------------------------------------------------------------------------------------------------------------------------------------------------------------------------------------------------------------------------------------------------------------------------------------------------------------------------------------------------------------------------------------------------------------------------------------------------------------------------------------------------------------------------------------------------------------------------------------------------------------------------------------------------------------------------------------------------------------------------------------------------------------------------------------------------------------------------------------------------------------------------------------------------------------------------------------------------------------------------------------------------------------------------------------------------------------------------------------------------------------------------------------------------------------------------------------------------------------------------------------------------------------------------------------------------------------|
|                          | Down-regulated                                                                                                                                        | CALCIUM_INDEPENDENT_CELL_CELL_ADHESION<br>DEVELOPMENTAL_MATURATION<br>FATTY_ACID_BIOSYNTHETIC_PROCESS                                                                                                                                                                                                                                                                                                                                                                                                                                                                                                                                                                                                                                                                                            | <u>CLDN23</u> , <u>CLDN3</u> , <u>CLDN4</u> , <u>CLDN7</u> , <u>CLDN8</u><br><u>FARP2</u> , <u>KRT19</u> , <u>MYH11</u> , <u>MYOZ1</u> , <u>TTN</u><br><u>CD74</u> , <u>FADS2</u> , <u>PTGDS</u> , <u>PTGES3</u> , <u>PTGS1</u>                                                                                                                                                                                                                                                                                                                                                                                                                                                                                                                                                                                                                                                                                                                                                                                                                                                                                                                                                                                                                                                                                                                                                                                                                                                                                                                                                                                                                                                                                                                                                                                                                                                                                                                                                                                                                                                                                                                                                                                                                                                                                                                                                                                                                                                                                                                                                                                                                                                                                                                                                                                                                                                                                                       |
|                          |                                                                                                                                                       | <b>Enriched KEGG gene sets (NES ≥1.5, NOM <i>p</i>-value ≤0.05 and FDR <i>q</i>-value ≤0.25) in zebrafish liver hyperplasia</b>                                                                                                                                                                                                                                                                                                                                                                                                                                                                                                                                                                                                                                                                  | <b>Enriched gene lists</b>                                                                                                                                                                                                                                                                                                                                                                                                                                                                                                                                                                                                                                                                                                                                                                                                                                                                                                                                                                                                                                                                                                                                                                                                                                                                                                                                                                                                                                                                                                                                                                                                                                                                                                                                                                                                                                                                                                                                                                                                                                                                                                                                                                                                                                                                                                                                                                                                                                                                                                                                                                                                                                                                                                                                                                                                                                                                                                            |
|                          | Up-regulated                                                                                                                                          | HSA00230_PURINE_METABOLISM<br><br>HSA00240_PYRIMIDINE_METABOLISM<br><br>HSA00480_GLYTATHIONE_METABOLISM<br>HSA00561_GLYCEROLIPID_METABOLISM<br>HSA03030_DNA_POLYMERASE<br>HSA03320_PPAR_SIGNALING_PATHWAY<br><br>HSA04010_MAPK_SIGNALING_PATHWAY<br><br>HSA04012_ERBB_SIGNALING_PATHWAY<br><br>HSA04110_CELL_CYCLE<br><br>HSA04115_P53_SIGNALING_PATHWAY<br><br>HSA04150_MTOR_SIGNALING_PATHWAY<br>HSA04310_WNT_SIGNALING_PATHWAY<br><br>HSA04370_VEGF_SIGNALING_PATHWAY<br><br>HSA04540_GAP_JUNCTION<br><br>HSA04610_COMPLEMENT_AND_COAGULATION_CASCADES<br><br>HSA04720_LONG_TERM_POTENTIATION<br><br>HSA04730_LONG_TERM_DEPRESSION<br>HSA04912_GNRH_SIGNALING_PATHWAY                                                                                                                         | <u>ADK</u> , <u>ADSSL1</u> , <u>AK5</u> , <u>GDA</u> , <u>NME2</u> , <u>NME4</u> , <u>PDE8B</u> , <u>POLA1</u> ,<br><u>POLA2</u> , <u>POLD2</u> , <u>POLE2</u> , <u>RFC5</u> , <u>RRM2</u><br><br>DCTD, <u>DHODH</u> , <u>DPYD</u> , <u>NME2</u> , <u>NME4</u> , <u>NP</u> , <u>POLA1</u> , <u>POLA2</u> ,<br><u>POLD2</u> , <u>POLE2</u> , <u>RFC5</u> , <u>RRM2</u> , <u>RRM2B</u> , <u>TK1</u> , <u>UPB1</u><br><u>GGT1</u> , <u>GPX1</u> , <u>GPX4</u> , <u>MGST1</u> , <u>OPLAH</u><br><u>CEL</u> , <u>GK</u> , <u>LIPA</u> , <u>LIPC</u> , <u>LPL</u><br><u>POLA1</u> , <u>POLA2</u> , <u>POLB</u> , <u>POLD2</u> , <u>POLE2</u> , <u>RFC5</u><br><u>ACSL5</u> , <u>APOA1</u> , <u>FABP2</u> , <u>FABP3</u> , <u>GK</u> , <u>LPL</u> , <u>PLTP</u> , <u>PPARD</u> ,<br><u>RXRA</u> , <u>UBC</u><br><u>BRAF</u> , <u>DUSP5</u> , <u>DUSP6</u> , <u>FGFR4</u> , <u>GADD45A</u> , <u>GADD45B</u> ,<br><u>GNG12</u> , <u>MAP3K12</u> , <u>MAPK1</u> , <u>MAPK3</u> , <u>MAPK8</u> , <u>MAPKAPK2</u> ,<br><u>MAPT</u> , <u>NFKB2</u> , <u>NLK</u> , <u>PDGFRA</u> , <u>PRKACA</u> , <u>PRKCB1</u> , <u>TP53</u><br><u>BRAF</u> , <u>CAMK2A</u> , <u>CAMK2D</u> , <u>MAPK1</u> , <u>MAPK3</u> , <u>MAPK8</u> ,<br><u>PIK3CA</u> , <u>PRKCB1</u> , <u>SRC</u><br><u>CCNB1</u> , <u>CCNB2</u> , <u>CCND1</u> , <u>CDC25A</u> , <u>GADD45A</u> , <u>GADD45B</u> ,<br><u>MCM2</u> , <u>MCM3</u> , <u>MCM5</u> , <u>MDM2</u> , <u>ORC3L</u> , <u>PCNA</u> , <u>SMAD4</u> ,<br><u>TFDP1</u> , <u>TP53</u> , <u>YWHAB</u><br><u>BAX</u> , <u>CCNB1</u> , <u>CCNB2</u> , <u>CCND1</u> , <u>CCNG2</u> , <u>GADD45A</u> ,<br><u>GADD45B</u> , <u>IGF1</u> , <u>IGFBP3</u> , <u>MDM2</u> , <u>RRM2</u> , <u>RRM2B</u> , <u>TP53</u><br><u>BRAF</u> , <u>CAB39</u> , <u>IGF1</u> , <u>MAPK1</u> , <u>MAPK3</u> , <u>PIK3CA</u><br><u>CAMK2A</u> , <u>CAMK2D</u> , <u>CCND1</u> , <u>CTBP1</u> , <u>FZD8</u> , <u>MAPK8</u> , <u>NLK</u> ,<br><u>PPARD</u> , <u>PRICKLE1</u> , <u>PRKACA</u> , <u>PRKCB1</u> , <u>TP53</u> , <u>WNT16</u><br><u>MAPK1</u> , <u>MAPK3</u> , <u>MAPKAPK2</u> , <u>PIK3CA</u> , <u>PRKCB1</u> , <u>PXN</u> ,<br><u>SRC</u><br><u>DRD2</u> , <u>MAPK1</u> , <u>MAPK3</u> , <u>PDGFRA</u> , <u>PRKACA</u> , <u>PRKCB1</u> ,<br><u>PRKG2</u> , <u>SRC</u> , <u>TUBA1A</u><br><u>A2M</u> , <u>C1S</u> , <u>C3</u> , <u>C8G</u> , <u>C9</u> , <u>CFB</u> , <u>CFH</u> , <u>F10</u> , <u>F2</u> , <u>F7</u> , <u>F9</u> , <u>FGA</u> ,<br><u>FGB</u> , <u>FGG</u> , <u>MASP2</u> , <u>PLG</u> , <u>PROC</u> , <u>SERPINA1</u> , <u>SERPINC1</u> ,<br><u>SERPINF2</u><br><u>BRAF</u> , <u>CAMK2A</u> , <u>CAMK2D</u> , <u>MAPK1</u> , <u>MAPK3</u> , <u>PRKACA</u> ,<br><u>PRKCB1</u><br><u>BRAF</u> , <u>IGF1</u> , <u>MAPK1</u> , <u>MAPK3</u> , <u>PRKCB1</u> , <u>PRKG2</u><br><u>CAMK2A</u> , <u>CAMK2D</u> , <u>MAPK1</u> , <u>MAPK3</u> , <u>MAPK8</u> , <u>MMP14</u> ,<br><u>PRKACA</u> , <u>PRKCB1</u> , <u>SRC</u> |
| Down-regulated           | HSA00010_GLYCOLYSIS_AND_GLUconeogenesis<br><br>HSA00330_ARGININE_AND_PROLINE_METABOLISM<br>HSA01430_CELL_COMMUNICATION<br><br>HSA04530_TIGHT_JUNCTION | <u>ADH5</u> , <u>ALDH7A1</u> , <u>ALDOA</u> , <u>BPGM</u> , <u>GAPDH</u> , <u>PDHB</u> , <u>PFKM</u> ,<br><u>PGAM2</u> , <u>PKM2</u> , <u>TPI1</u><br><u>ASS1</u> , <u>CKB</u> , <u>CKM</u> , <u>GOT1</u> , <u>NOS1</u> , <u>PYCR1</u> , <u>RARS2</u><br><u>COL11A2</u> , <u>COL17A1</u> , <u>COL1A1</u> , <u>COL1A2</u> , <u>COL2A1</u> , <u>COL5A1</u> ,<br><u>COL6A1</u> , <u>DSG2</u> , <u>GJC1</u> , <u>ITGB4</u> , <u>KRT15</u> , <u>KRT17</u> , <u>KRT18</u> ,<br><u>KRT19</u> , <u>KRT8</u> , <u>VIM</u><br><u>CLDN23</u> , <u>CLDN3</u> , <u>CLDN4</u> , <u>CLDN7</u> , <u>CLDN8</u> , <u>GNAI2</u> , <u>MYH2</u> ,<br><u>MYH4</u> , <u>MYH6</u> , <u>MYL2</u> , <u>MYL7</u> , <u>MYL9</u> , <u>NRAS</u> , <u>OCLN</u> ,<br><u>PPP2R1A</u> , <u>PPP2R1B</u> , <u>RRAS</u> , <u>TJP3</u> |                                                                                                                                                                                                                                                                                                                                                                                                                                                                                                                                                                                                                                                                                                                                                                                                                                                                                                                                                                                                                                                                                                                                                                                                                                                                                                                                                                                                                                                                                                                                                                                                                                                                                                                                                                                                                                                                                                                                                                                                                                                                                                                                                                                                                                                                                                                                                                                                                                                                                                                                                                                                                                                                                                                                                                                                                                                                                                                                       |
| Zebrafish HCC (9 months) |                                                                                                                                                       | <b>Enriched GO gene sets (NES ≥1.5, NOM <i>p</i>-value ≤0.05 and FDR <i>q</i>-value ≤0.25) in zebrafish HCC (9 months)</b>                                                                                                                                                                                                                                                                                                                                                                                                                                                                                                                                                                                                                                                                       | <b>Enriched gene lists</b>                                                                                                                                                                                                                                                                                                                                                                                                                                                                                                                                                                                                                                                                                                                                                                                                                                                                                                                                                                                                                                                                                                                                                                                                                                                                                                                                                                                                                                                                                                                                                                                                                                                                                                                                                                                                                                                                                                                                                                                                                                                                                                                                                                                                                                                                                                                                                                                                                                                                                                                                                                                                                                                                                                                                                                                                                                                                                                            |
|                          | Up-regulated                                                                                                                                          | ACTIN_CYTOSKELETON_ORGANIZATION_AND_BIOGENESIS<br><br>ACTIN_FILAMENT_BASED_PROCESS<br><br>AMINO_ACID_AND_DERIVATIVE_METABOLIC_PROCESS<br><br>AMINO_ACID_METABOLIC_PROCESS<br><br>ANGIOGENESIS<br><br>ANTI_APOPTOSIS                                                                                                                                                                                                                                                                                                                                                                                                                                                                                                                                                                              | <u>ADRA2A</u> , <u>ARHGEF2</u> , <u>ARPC5</u> , <u>CDC42</u> , <u>CXCL12</u> , <u>DBN1</u> ,<br><u>DLG1</u> , <u>RAC1</u> , <u>RAC3</u> , <u>RACGAP1</u> , <u>RHOA</u> , <u>RND1</u> , <u>SCIN</u> , <u>TTN</u><br><u>ADRA2A</u> , <u>ARHGEF2</u> , <u>ARPC5</u> , <u>CDC42</u> , <u>CXCL12</u> , <u>DBN1</u> ,<br><u>DLG1</u> , <u>MYH10</u> , <u>RAC1</u> , <u>RAC3</u> , <u>RACGAP1</u> , <u>RHOA</u> , <u>RND1</u> ,<br><u>SCIN</u> , <u>TTN</u><br><u>AARS</u> , <u>ASMTL</u> , <u>DHPS</u> , <u>ETNK1</u> , <u>FPGS</u> , <u>GAD1</u> , <u>GGT1</u> ,<br><u>GSTZ1</u> , <u>HGD</u> , <u>MAT1A</u> , <u>MSRA</u> , <u>PAH</u> , <u>SMS</u> , <u>TGFB2</u> , <u>WARS</u> ,<br><u>YARS</u><br><u>AARS</u> , <u>ALDH18A1</u> , <u>CDO1</u> , <u>FPGS</u> , <u>GAD1</u> , <u>GCLM</u> , <u>GGT1</u> ,<br><u>GSTZ1</u> , <u>HGD</u> , <u>KARS</u> , <u>MAT1A</u> , <u>MSRA</u> , <u>PAH</u> , <u>SMS</u> , <u>WARS</u> ,<br><u>YARS</u><br><u>ANGPT1</u> , <u>ANGPTL3</u> , <u>C1GALT1</u> , <u>CANX</u> , <u>PLG</u> , <u>RUNX1</u> , <u>SHH</u> ,<br><u>TGFB2</u> , <u>THY1</u><br><u>ANXA4</u> , <u>BCL2</u> , <u>BCL2L1</u> , <u>BIRC5</u> , <u>BNIP2</u> , <u>BNIP3L</u> , <u>CDC2</u> ,<br><u>DAD1</u> , <u>GPX1</u> , <u>HSPA9</u> , <u>NOTCH2</u> , <u>NPM1</u> , <u>RELA</u> , <u>TIAF1</u> ,<br><u>TPT1</u> , <u>TXNDC5</u>                                                                                                                                                                                                                                                                                                                                                                                                                                                                                                                                                                                                                                                                                                                                                                                                                                                                                                                                                                                                                                                                                                                                                                                                                                                                                                                                                                                                                                                                                                                                                                                                 |

|  |                                                                                                                                                                                                                                                                                                                                                                                                                                                                                                                                                                                                                                                                                                                                                                                                                                                                                                                                                                                                                                                                                           |                                                                                                                                                                                                                                                                                                                                                                                                                                                                                                                                                                                                                                                                                                                                                                                                                                                                                                                                                                                                                                                                                                                                                                                                                                                                                                                                                                                                                                                                                                                                                                                                                                                                                                                                                                                                                                                                                                                                                                                                                                                                                                                                                                                                                                                                                                                                                                                                                                                                                                                                                                                                                                                                                                                                                                                                                                                                                                                                                                                                                                                                                                                                                                                                                                                                                                                                                                                                                                                                                                                                                                                                  |
|--|-------------------------------------------------------------------------------------------------------------------------------------------------------------------------------------------------------------------------------------------------------------------------------------------------------------------------------------------------------------------------------------------------------------------------------------------------------------------------------------------------------------------------------------------------------------------------------------------------------------------------------------------------------------------------------------------------------------------------------------------------------------------------------------------------------------------------------------------------------------------------------------------------------------------------------------------------------------------------------------------------------------------------------------------------------------------------------------------|--------------------------------------------------------------------------------------------------------------------------------------------------------------------------------------------------------------------------------------------------------------------------------------------------------------------------------------------------------------------------------------------------------------------------------------------------------------------------------------------------------------------------------------------------------------------------------------------------------------------------------------------------------------------------------------------------------------------------------------------------------------------------------------------------------------------------------------------------------------------------------------------------------------------------------------------------------------------------------------------------------------------------------------------------------------------------------------------------------------------------------------------------------------------------------------------------------------------------------------------------------------------------------------------------------------------------------------------------------------------------------------------------------------------------------------------------------------------------------------------------------------------------------------------------------------------------------------------------------------------------------------------------------------------------------------------------------------------------------------------------------------------------------------------------------------------------------------------------------------------------------------------------------------------------------------------------------------------------------------------------------------------------------------------------------------------------------------------------------------------------------------------------------------------------------------------------------------------------------------------------------------------------------------------------------------------------------------------------------------------------------------------------------------------------------------------------------------------------------------------------------------------------------------------------------------------------------------------------------------------------------------------------------------------------------------------------------------------------------------------------------------------------------------------------------------------------------------------------------------------------------------------------------------------------------------------------------------------------------------------------------------------------------------------------------------------------------------------------------------------------------------------------------------------------------------------------------------------------------------------------------------------------------------------------------------------------------------------------------------------------------------------------------------------------------------------------------------------------------------------------------------------------------------------------------------------------------------------------|
|  | <p>BIOSYNTHETIC_PROCESS</p> <p>CARBOHYDRATE_BIOSYNTHETIC_PROCESS<br/>CARBOXYLIC_ACID_METABOLIC_PROCESS<br/>CATION_HOMEOSTASIS</p> <p>CELL_CELL_SIGNALING</p> <p>CELL_CYCLE_CHECKPOINT_GO_0000075<br/>CELL_PROLIFERATION_GO_0008283</p> <p>CELL_SURFACE_RECEPTOR_LINKED_SIGNAL_TRANSDUCTION_GO_0007166</p> <p>CELLULAR_BIOSYNTHETIC_PROCESS</p> <p>CELLULAR_CATION_HOMEOSTASIS</p> <p>CELLULAR_HOMEOSTASIS</p> <p>CELLULAR_LIPID_METABOLIC_PROCESS</p> <p>CELLULAR_LOCALIZATION</p> <p>CELLULAR_PROTEIN_CATABOLIC_PROCESS</p> <p>CHEMICAL_HOMEOSTASIS</p> <p>CYTOKINE_PRODUCTION<br/>DEFENSE_RESPONSE</p> <p>EPITHELIAL_TO_MESENCHYMAL_TRANSITION<br/>ESTABLISHMENT_OF_CELLULAR_LOCALIZATION</p> <p>ESTABLISHMENT_OF_PROTEIN_LOCALIZATION</p> <p>G_PROTEIN_COUPLED_RECEPTOR_PROTEIN_SIGNALING_PATHWAY</p> <p>GENERATION_OF_PRECURSOR_METABOLITES_AND_ENERGY<br/>GLYCEROPHOSPHOLIPID_METABOLIC_PROCESS<br/>GOLGI_VESICLE_TRANSPORT</p> <p>HOMEOSTATIC_PROCESS</p> <p>IMMUNE_RESPONSE</p> <p>IMMUNE_SYSTEM_PROCESS</p> <p>INTRACELLULAR_PROTEIN_TRANSPORT</p> <p>INTRACELLULAR_TRANSPORT</p> | <p>ADK, ALG5, ALG8, APOA1, ASMTL, CD74, CHPT1, CTPS, DHCR7, EEF1A1, EIF3C, EIF3E, EIF3F, EIF4A2, ETNK1, EXT1, FADS2, GALNT2, GCHFR, GYS2, HS6ST1, HSP90AA1, HSP90AB1, INHBB</p> <p>EXT1, GYS2, HS6ST1, MPDU1, PMM2</p> <p>AGXT, CD74, FADS2, HAACL1, HAO1, IGF1</p> <p>BCL2, CALR, CLCN3, CP, CXCL12, CXCR4, EDNRA, FTH1, SOD1, TFR2, THY1</p> <p>AGT, APOE, CCL21, CD9, EFN1, EFN2, FGF18, FGF4, FGF5, FGF6, GAD1, GCHFR, GJA3, GJB2, GRB2, IL15, INHBB, MAPK1, MBP</p> <p>BIRC5, CCNA2, CCNG2, CDC45L, NBN, TGFB1</p> <p>ABII, ADRA2A, ARHGEF2, CD74, CDC25A, CDC27, CLEC11A, COL18A1, CTBP1, DLG1, FABP3, FGF10, FGF18, FGF4, FGF5, FGF6, FLT1, FTH1, GCG, GPX1, IGF1, IL15</p> <p>ABII, ADRA2A, AGT, APOA1, APOE, BIRC2, BSG, C3, CBL, CXCL12, CXCR4, EDNRA, ENPP2, FGF5, FGFR4, FYN, GCG</p> <p>ADK, ASMTL, CD74, EEF1A1, EIF3C, EIF3E, EIF3F, EIF4A2, ETNK1, EXT1, FADS2, GCHFR, HS6ST1, HSP90AA1, HSP90AB1, INHBB, PAH, PMM2, RPL13, RPL18, RPL19, RPL23A, RPL26, RPL28, RPL30</p> <p>BCL2, CALR, CLCN3, CP, CXCL12, CXCR4, EDNRA, FTH1, SOD1, TFR2, THY1</p> <p>AIFM3, BCL2, BCL2L1, CALR, CLCN3, CP, CXCL12, CXCR4, EDNRA, FTH1, GPX1, PCDH15, RHCG, RHOT1, SOD1, TFR2, THY1</p> <p>APOA1, APOM, CD74, CHPT1, DHCR7, ETNK1, FADS2, GPX4, HAACL1, HAO1, LPL, PI4KB, PIK3C2A, PIK3R1, SERINC1, SHH, SOD1, WWOX</p> <p>AGXT, AP3B1, APOA1, APOE, ARCN1, BCL2, BCL2L1, BIRC5, CALR, CANX, CD74, CDH1, DERL1, DOPEY2, ERGIC3, GBF1, GOSR2, GSK3B, HSP90AA1, KDELR2, KRT18, LMAN1, MYH10, NCKIPSD, NPM1, NUP107, PDIA3, PDIA4, PEX3, RAB14</p> <p>CDC20, DERL1, EDEM1, RNF11, SYVN1, UBE2D2, UBE2G1, UBE2H, UBE2L3</p> <p>AIFM3, ANGPTL3, APOA1, APOE, BCL2, BCL2L1, CALR, CAV1, CLCN3, CP, CXCL12, CXCR4, DERL1, EDNRA, FTH1, RHCG, SOD1, TFR2, THY1</p> <p>APOA1, INHBB, SOD1, TGFB2, TLR3</p> <p>AHSG, BCL2, BNIP3L, CCL21, CXCR4, HP, INHBB, RAC1, RELA, TGFB1, TIAL1, TLR3</p> <p>CTNNA1, S100A4, TGFB1, TGFB2, TGFB3</p> <p>AGXT, AP3B1, APOA1, APOE, ARCN1, BCL2, BCL2L1, BIRC5, CALR, CANX, CD74, CDH1, DERL1, DOPEY2, ERGIC3, GBF1, GOSR2, GSK3B, HSP90AA1, KDELR2, KRT18, LMAN1, MYH10, NCKIPSD, NPM1, NUP107, PDIA3, PDIA4, PEX3, RAB14, RAB3GAP2, RHOT1</p> <p>AGXT, AIP, ANGPTL3, AP3B1, APOA1, ARCN1, CALR, CANX, CD74, CDH1, DERL1, GSK3B, KDELR2, NCKIPSD, NPM1, PDIA3, PEX3, RAB3GAP2, SNAPIN, SSR2, TGFB1, TPR, TRAM1</p> <p>ADRA2A, APOA1, APOE, C3, CXCL12, CXCR4, EDNRA, ENPP2, GCG, GPR34</p> <p>APOM, GPX4, GSK3B, GYS2, ISL1, PDX1, SLC25A3</p> <p>APOA1, DPM1, PI4KB, PIGF, PIK3C2A, PIK3R1, SERINC1</p> <p>COPB2, COPZ1, DOPEY2, ERGIC3, GBF1, GOLGA5, GOSR2, KRT18, LMAN1, LMAN2L, RAB14, RER1, SCAMP3, SEC22A, TMED10, ZW10</p> <p>AIFM3, ANGPTL3, APOA1, APOE, BCL2, BCL2L1, CALR, CAV1, CLCN3, CP, CXCL12, CXCR4, DERL1, EDNRA, FTH1, GPX1, MAFB, PCDH15, RHCG, RHOT1, SOD1, TFR2, THY1</p> <p>ANXA11, APOA1, AQP9, BCL2, BNIP3L, CCL21, CD74, CTSW, CXCL12, CXCR4, FTH1, FYN, IL15, MBP, MRI, NFIL3, PAX5, TCF7, TGFB1, TGFB2, THY1, VTN</p> <p>ANXA11, APOA1, AQP9, BCL2, BNIP3L, CCL21, CD74, CDC42, CTSW, CXCL12, CXCR4, FTH1, FYN, IL15, MAFB, MBP, NFIL3, NOTCH2</p> <p>AGXT, AP3B1, ARCN1, CALR, CD74, CDH1, DERL1, GSK3B, KDELR2, NCKIPSD, NPM1, PDIA3, PEX3, RAB3GAP2, SNAPIN, SSR2, TGFB1, TPR, TRAM1</p> <p>AGXT, ANP32A, AP3B1, AP3M1, APOE, APPBP2, ARCN1, BCL2, BCL2L1, CALR, CD74, CDH1, COPZ1, CRYAA, DERL1, DOPEY2, ERGIC3, GBF1, GOSR2, GSK3B, HSP90AA1, KDELR2, KHDRBS1, KIF1B, KRT18, LMAN1, MTX2, MYH10, NCKIPSD, NPM1, NUP107, PDIA3, PEX3, RAB14, RAB3GAP2, RHOT1, RPL11, SEC22A, SNAPIN, SSR2, STARD3, TGFB1, TIMM17A, TMED10, TOM1</p> |
|--|-------------------------------------------------------------------------------------------------------------------------------------------------------------------------------------------------------------------------------------------------------------------------------------------------------------------------------------------------------------------------------------------------------------------------------------------------------------------------------------------------------------------------------------------------------------------------------------------------------------------------------------------------------------------------------------------------------------------------------------------------------------------------------------------------------------------------------------------------------------------------------------------------------------------------------------------------------------------------------------------------------------------------------------------------------------------------------------------|--------------------------------------------------------------------------------------------------------------------------------------------------------------------------------------------------------------------------------------------------------------------------------------------------------------------------------------------------------------------------------------------------------------------------------------------------------------------------------------------------------------------------------------------------------------------------------------------------------------------------------------------------------------------------------------------------------------------------------------------------------------------------------------------------------------------------------------------------------------------------------------------------------------------------------------------------------------------------------------------------------------------------------------------------------------------------------------------------------------------------------------------------------------------------------------------------------------------------------------------------------------------------------------------------------------------------------------------------------------------------------------------------------------------------------------------------------------------------------------------------------------------------------------------------------------------------------------------------------------------------------------------------------------------------------------------------------------------------------------------------------------------------------------------------------------------------------------------------------------------------------------------------------------------------------------------------------------------------------------------------------------------------------------------------------------------------------------------------------------------------------------------------------------------------------------------------------------------------------------------------------------------------------------------------------------------------------------------------------------------------------------------------------------------------------------------------------------------------------------------------------------------------------------------------------------------------------------------------------------------------------------------------------------------------------------------------------------------------------------------------------------------------------------------------------------------------------------------------------------------------------------------------------------------------------------------------------------------------------------------------------------------------------------------------------------------------------------------------------------------------------------------------------------------------------------------------------------------------------------------------------------------------------------------------------------------------------------------------------------------------------------------------------------------------------------------------------------------------------------------------------------------------------------------------------------------------------------------------|

|                                                                       |                                                                                                                                                                                                                                                  |
|-----------------------------------------------------------------------|--------------------------------------------------------------------------------------------------------------------------------------------------------------------------------------------------------------------------------------------------|
| ION_HOMEOSTASIS                                                       | AIFM3, BCL2, BCL2L1, CALR, CLCN3, CP, CXCL12, CXCR4, EDNRA, FTH1, RHCG, SOD1, TFR2, THY1                                                                                                                                                         |
| ION_TRANSPORT                                                         | CACNA1D, FXYD1, KCNC1, KCNJ1, RHCG, SGK1, SLC34A2, SLC8A1, TRPA1, UCP3                                                                                                                                                                           |
| LIPID_BIOSYNTHETIC_PROCESS                                            | APOA1, CD74, CHPT1, DHCR7, ETNK1, FADS2, PI4KB, PIK3C2A, SOD1                                                                                                                                                                                    |
| LIPID_TRANSPORT                                                       | ABCD3, ANGPTL3, APOA1, APOE, CAV1, CHKA                                                                                                                                                                                                          |
| MACROMOLECULE_BIOSYNTHETIC_PROCESS                                    | AARS, ALG1, ALG5, ALG8, APOA1, CEBPG, DHPS, DPM1, EIF1A1, EIF2B1, EIF2S3, EIF3C, EIF3E, EIF3F, EIF4A2, EXT1, GALNT2, GYS2, HS6ST1, INHBB, MGAT4B, MPDU1, NACA, PIGF, PMM2, RPL11, RPL13, RPL18, RPL19, RPL23A, RPL26, RPL28, RPL30, RPL34, RPL35 |
| MACROMOLECULE_LOCALIZATION                                            | AGXT, AIP, ANGPTL3, AP3B1, APOA1, ARCNI, BIRC5, CALR, CANX, CD74, CDH1, DERL1, GSK3B, KDELR2, NCKIPSD, NPM1, NUP107, PDIA3, PEX3, RAB3GAP2, SNAPIN, SSR2, TGFB1, TPR, TRAM1                                                                      |
| MEMBRANE_LIPID_METABOLIC_PROCESS                                      | APOA1, APOM, CHPT1, ETNK1, GPX4, LPL, PI4KB, PIK3C2A, PIK3R1, SERINC1                                                                                                                                                                            |
| MEMBRANE_ORGANIZATION_AND_BIOGENESIS                                  | AGRN, AHSG, BCL2, BCL2L1, CBL, CD9, CORO1C, GOSR2, PI4KB, PICALM, RAB1E, RAC1, SOD1, VAPA                                                                                                                                                        |
| MONOCARBOXYLIC_ACID_METABOLIC_PROCESS                                 | AGXT, CD74, FADS2, HACL1, HAO1, IGF1                                                                                                                                                                                                             |
| MONOVALENT_INORGANIC_CATION_TRANSPORT                                 | KCNC1, KCNJ1, SGK1, SLC8A1, UCP3                                                                                                                                                                                                                 |
| MULTI_ORGANISM_PROCESS                                                | AGT, BCL2, BNIP3L, C9, CXCL12, CXCR4, DERL1, FLT1, MAFF, PPARC, SOD1, TGFB1, TLR3, TNIP1                                                                                                                                                         |
| NEGATIVE_REGULATION_OF_APOPTOSIS                                      | ANXA4, ASNS, BCL2, BCL2L1, BIRC5, BNIP2, BNIP3L, CD74, CDC2, DAD1, GPX1, GSK3B, HSPA9, KRT18, MAPK8, NME2, NOTCH2, NPM1, PIMI, PROC, RELA, SOD1, TIAF1, TPT1, TXNDC5                                                                             |
| NEGATIVE_REGULATION_OF_BIOLOGICAL_PROCESS                             | AB11, ADAM10, AHSG, AMBP, ANXA4, APOA1, ARHGEF2, ASNS, BCL2, BCL2L1, BIRC5, BNIP2, BNIP3L, CD74, CDC2, CDC42, CDC45L, COL18A1, CTBP1, DAD1, DLG1, FABP3, FTH1                                                                                    |
| NEGATIVE_REGULATION_OF_DEVELOPMENTAL_PROCESS                          | AHSG, ANXA4, ASNS, BCL2, BCL2L1, BIRC5, BNIP2, BNIP3L, CD74, CDC2, DAD1, GPX1, GSK3B, HSPA9, KRT18, MAFB, MAPK8, NME2, NOTCH1, NOTCH2, NPM1, PIMI, PLG, PROC, RELA, SHH, SOD1, THY1, TIAF1, TPT1, TXNDC5                                         |
| NEGATIVE_REGULATION_OF_METABOLIC_PROCESS                              | ARHGEF2, CDC42, CDC45L, ID1, ID2, IGF1, INHBB, KLF12, MAPRE1, MDM2, MDM4, PA2G4, SOD1, STAT3, TBX2, TGFB1, TP63                                                                                                                                  |
| NEGATIVE_REGULATION_OF_MULTICELLULAR_ORGANISMAL_PROCESS               | AHSG, PROC, SOD1, TGFB2, THY1                                                                                                                                                                                                                    |
| NEGATIVE_REGULATION_OF_PROGRAMMED_CELL_DEATH                          | ANXA4, ASNS, BCL2, BCL2L1, BIRC5, BNIP2, BNIP3L, CD74, CDC2, DAD1, GPX1, GSK3B, HSPA9, KRT18, MAPK8, NME2, NOTCH2, NPM1, PIMI, PROC, RELA, SOD1, TIAF1, TPT1, TXNDC5                                                                             |
| NITROGEN_COMPOUND_BIOSYNTHETIC_PROCESS                                | ASMTL, ETNK1, GCHFR, HSP90AA1, HSP90AB1, PAH, TGFB2                                                                                                                                                                                              |
| ORGAN_MORPHOGENESIS                                                   | ANGPTL3, C1GALT1, CANX, COL18A1, FGF10, FLI1, LAMB1, NKX6-1, NOTCH2, PAX3, PAX5, PAX6, PDX1, PLG, PROX1, RUNX1, SHH, SOD1, TGFB1, TGFB2, TGFB3, THY1                                                                                             |
| ORGANIC_ACID_METABOLIC_PROCESS                                        | AGXT, CD74, FADS2, FPGS, GAD1, GGT1, GSTZ1, HACL1, HAO1, IGF1, MAT1A, MSRA, PAH                                                                                                                                                                  |
| PHOSPHOINOSITIDE_METABOLIC_PROCESS                                    | DPM1, PI4KB, PIGF, PIK3C2A, PIK3R1                                                                                                                                                                                                               |
| PHOSPHOLIPID_BIOSYNTHETIC_PROCESS                                     | APOA1, CHPT1, DPM1, ETNK1, PI4KB, PIGF, PIK3C2A                                                                                                                                                                                                  |
| PHOSPHOLIPID_METABOLIC_PROCESS                                        | APOA1, CHPT1, ETNK1, GPX4, LPL, PI4KB, PIK3C2A, PIK3R1, SERINC1                                                                                                                                                                                  |
| PHOSPHORYLATION                                                       | AB11, ADAM10, BCR, CCND1, CSNK2A1, CTBP1, GLYCTK, GSK3B, IGF1, IGF1R, MAPK3, MAPK8, MAPKAP2, MCM7, MKNK2, MOBKL1A, PIK3R1, PRKCB1, PIMI, ROCK2                                                                                                   |
| POSITIVE_REGULATION_OF_CELL_PROLIFERATION                             | ADRA2A, CLEC11A, FGF10, FGF18, FGF4, FLT1, IGF1, IL15, LAMB1, NME2, TBX2, TGFB2, TGFB2, TSPAN31                                                                                                                                                  |
| POSITIVE_REGULATION_OF_CELLULAR_COMPONENT_ORGANIZATION_AND_BIOGENESIS | AHSG, CBL, CDC42, CDC42EP4, ROBO2                                                                                                                                                                                                                |
| POSITIVE_REGULATION_OF_CELLULAR_PROCESS                               | ADRA2A, AHSG, AIFM3, ANGPTL3, APOE, ARNTL, ASNS, BIRC2, BIRC5, BNIP3L, CBL, CCND1, CDC42, CDC42EP4, CDH1, CLEC11A, CLOCK, ECT2, EGR1, FGF10, FGF18, FGF4, FLT1                                                                                   |
| POST_TRANSLATIONAL_PROTEIN_MODIFICATION                               | AB11, ADAM10, BCR, CBL, CCND1, CSNK2A1, CTBP1, GAD1, GLYCTK, GSK3B, IGF1, IGF1R, MAPK3, MAPK8, MAPKAP2, MDM2, MKNK2, MOBKL1A                                                                                                                     |
| PROTEIN_AMINO_ACID_PHOSPHORYLATION                                    | AB11, ADAM10, BCR, CCND1, CSNK2A1, CTBP1, GLYCTK, GSK3B, IGF1, IGF1R, MAPK3, MAPK8, MAPKAP2, MKNK2, MOBKL1A, PIMI, PRKCB1, ROCK2, SGK1, TGFB1                                                                                                    |
| PROTEIN_FOLDING                                                       | AIP, BAG2, CCT4, CCT6A, CCT7, DNAJA1, HSP90AA1, HSPE1, LMAN1, LRPAP1, RUVBL2                                                                                                                                                                     |

|                                                              |                                                                                                                                                                                                                                              |
|--------------------------------------------------------------|----------------------------------------------------------------------------------------------------------------------------------------------------------------------------------------------------------------------------------------------|
| PROTEIN_KINASE_CASCADE                                       | ADRA2A, AMBP, BIRC2, CXCR4, ECT2, FGFR1, FYN, GADD45G, HMOX1, MAPK8, MAPKAPK2, MKNK2, NLK, RELA, RHOA, SOD1, SRC, STAT3, STAT5B                                                                                                              |
| PROTEIN_LOCALIZATION                                         | AGXT, AIP, ANGPTL3, AP3B1, APOA1, ARCNI, BIRC5, CALR, CANX, CD74, CDH1, DERL1, GSK3B, KDELR2, NCKIPSD, NPM1, PDIA3, PEX3, RAB3GAP2, SNAPIN, SSR2, TGFB1, TPR, TRAM1                                                                          |
| PROTEIN_METABOLIC_PROCESS                                    | ABI1, ADAM10, ADPRH, AGRN, AIP, AKT2, ALG5, ALG8, ANGPTL3, APOA1, APOE, ARHGEF2, BAG2, BCR, CBL, CCND1, CCT4, CCT6A, CCT7, CD74, CD9, CDC20, CDC42, CLDN14, CSNK2A1, CTBP1, CTSK, CXCL12                                                     |
| PROTEIN_MODIFICATION_PROCESS                                 | ABI1, ADAM10, ADPRH, AKT2, ALG5, ALG8, BCR, CBL, CCND1, CSNK2A1, CTBP1, FBXO11, GAD1, GALNT2, GLYCTK, GSK3B, IGFBP3                                                                                                                          |
| PROTEIN_TARGETING                                            | AGXT, CALR, CDH1, GSK3B, NCKIPSD, PDIA3, SSR2, TGFB1, TPR, TRAM1                                                                                                                                                                             |
| PROTEIN_TRANSPORT                                            | AGXT, AIP, ANGPTL3, AP3B1, ARCNI, CALR, CD74, CDH1, DERL1, GSK3B, KDELR2, NCKIPSD, NPM1, PDIA3, PEX3, RAB3GAP2, SNAPIN, SSR2, TGFB1, TPR, TRAM1                                                                                              |
| RAS_PROTEIN_SIGNAL_TRANSDUCTION                              | ADRA2A, APOA1, APOE, ARHGAP29, GNB1, GRAP, GRB2, IGF1, NOTCH2, RAC1, RHOA                                                                                                                                                                    |
| REGULATION_OF_ANATOMICAL_STRUCTURE_MORPHOGENESIS             | CDO1, CDC42, CDC42EP4, ROBO2, THY1                                                                                                                                                                                                           |
| REGULATION_OF_APOPTOSIS                                      | AIFM3, ANXA4, APOE, ASNS, BCL2, BCL2L1, BIRC5, BNIP2, BNIP3L, CALR, CD74, CDC2, DAD1, GPX1, GSK3B, HSPA9, HSPD1, IGFBP3, KRT18, MAPK1, MAPK8, NME2, NOTCH2, NPM1, PIM1, PLG                                                                  |
| REGULATION_OF_CELL_DIFFERENTIATION                           | IGFBP3, MAFB, NME2, NOTCH1, NOTCH2, RUNX1, SCIN, SHH, TGFB2                                                                                                                                                                                  |
| REGULATION_OF_CELL_MIGRATION                                 | ANGPTL3, LAMB1, PLG, SHH, THY1                                                                                                                                                                                                               |
| REGULATION_OF_CELL_PROLIFERATION                             | ABI1, ADRA2A, ARHGEF2, CLEC11A, COL18A1, CTBP1, FABP3, FGF10, FGF18, FGF4, FLT1, FTH1, GPX1, IGF1, IL15, LAMB1, MDM2, MDM4, NME2, NOTCH2, NPM1, PLG, SCIN                                                                                    |
| REGULATION_OF_CELLULAR_COMPONENT_ORGANIZATION_AND_BIOGENESIS | AHSG, APOE, ARHGEF2, CBL, CDC42, CDC42EP4, CXCL12, EIF3C, EIF3E, EIF3F, EIF4A2, MAPRE1, RAC1, ROBO2, THY1                                                                                                                                    |
| REGULATION_OF_CELLULAR_METABOLIC_PROCESS                     | AHR, ANGPTL3, ARHGEF2, ARNTL, ATF5, BRD7, CALR, CCND1, CDC45L, CLOCK, CXCL12, EGRI, EIF3C, EIF3E, EIF3F, EIF4A2, GATA6                                                                                                                       |
| REGULATION_OF_CELLULAR_PROTEIN_METABOLIC_PROCESS             | ANGPTL3, ARHGEF2, CCND1, CXCL12, EIF3C, EIF3E, EIF3F, EIF4A2, IGFBP3, INHBB, MAPRE1, SHH, TGFB1, TLR3                                                                                                                                        |
| REGULATION_OF_DEVELOPMENTAL_PROCESS                          | AHSG, AIFM3, ANGPTL3, ANXA4, APOE, ASNS, BCL2, BCL2L1, BIRC5, BNIP2, BNIP3L, CALR, CD74, CDC2, CDC42, CDC42EP4, DAD1, GPX1, GSK3B, HSPA9, HSPD1, IGFBP3, KRT18, MAFB                                                                         |
| REGULATION_OF_METABOLIC_PROCESS                              | AHR, ANGPTL3, ARHGEF2, ARNTL, ATF5, BRD7, CALR, CCND1, CDC42, CDC45L, CLOCK, CXCL12, EGRI, EIF3C, EIF3E, EIF3F, EIF4A2, GATA6                                                                                                                |
| REGULATION_OF_MITOTIC_CELL_CYCLE                             | ASNS, BIRC5, DLG1, RCC1, TGFB1                                                                                                                                                                                                               |
| REGULATION_OF_MOLECULAR_FUNCTION                             | ADRA2A, AIFM3, ANGPTL3, BCL2, BIRC5, CCND1, CCNG1, CDC25A, CXCR4, EDNRA, GADD45G, GPX1, ID1, ID2, NPM1                                                                                                                                       |
| REGULATION_OF_PROGRAMMED_CELL_DEATH                          | AIFM3, ANXA4, APOE, ASNS, BCL2, BCL2L1, BIRC5, BNIP2, BNIP3L, CALR, CD74, CDC2, DAD1, GPX1, GSK3B, HSPA9, HSPD1, IGFBP3, KRT18, MAPK1, MAPK8, NME2, NOTCH2, NPM1, PIM1, PLG                                                                  |
| REGULATION_OF_PROTEIN_METABOLIC_PROCESS                      | ANGPTL3, ARHGEF2, CCND1, CDC42, CXCL12, EIF3C, EIF3E, EIF3F, EIF4A2, IGFBP3, INHBB, MAPRE1, MDM2, MDM4, SHH, TGFB1, TLR3                                                                                                                     |
| REGULATION_OF_TRANSFERASE_ACTIVITY                           | ADRA2A, CCND1, CCNG1, CDC25A, CXCR4, GADD45G, SERINC1, SOD1, THY1                                                                                                                                                                            |
| RESPONSE_TO_ORGANIC_SUBSTANCE                                | AQP9, BCL2, GYS2, RELA, SOD1                                                                                                                                                                                                                 |
| RHO_PROTEIN_SIGNAL_TRANSDUCTION                              | ADRA2A, APOA1, APOE, ARHGAP29, RAC1, RHOA, APOA1, AQP9, CANX, CLCNKA, COPZ1, DOPEY2, ERGIC3, GBF1, GOSR2, INHBB, KCNJ1, KRT18, LMAN1, PDIA4, RAB14, RIMS1, SCIN, SNAPIN, TMED10                                                              |
| SIGNAL_TRANSDUCTION                                          | ABI1, ADAM10, ADRA2A, AGRN, AGT, AIFM3, ALCAM, AMBP, ANGPT1, ANXA4, APOA1, APOE, ARHGAP29, BCAR3, BCL2L1, BIRC2, BSG, C3, CBL, CCNA2, CD74, ADRA2A, APOA1, APOE, ARHGAP29, GNB1, GRAP, GRB2, IGF1, NOTCH2, PTPLAD1, RAC1, RHOA, RUNC3A, VAV3 |
| SMALL_GTPASE_MEDIATED_SIGNAL_TRANSDUCTION                    | CDO1, CHST5, EXT1, GCLM, GPX1, HS6ST1, MSRA, SMS, SOD1, TPST1                                                                                                                                                                                |
| SULFUR_METABOLIC_PROCESS                                     |                                                                                                                                                                                                                                              |

|                |                                                                                                                                                                                                                                                                                                                                                                                                                                                                                                                                                                                                                                                                                                                                                                                                                     |                                                                                                                                                                                                                                                                                                                                                                                                                                                                                                                                                                                                                                                                                                                                                                                                                                                                                                                                                                                                                                                                                                                                                                                                                                                                                                                                                                                                                                                                                                                                                                                                                                                                                                                                                                                                                                                                                                                                                                                                                                                                                                                                                                                                                                                                                                                                                                                                                                                                                                                                                                                                                                                                                                                                                                                                                                                                                                                                                                                                                |
|----------------|---------------------------------------------------------------------------------------------------------------------------------------------------------------------------------------------------------------------------------------------------------------------------------------------------------------------------------------------------------------------------------------------------------------------------------------------------------------------------------------------------------------------------------------------------------------------------------------------------------------------------------------------------------------------------------------------------------------------------------------------------------------------------------------------------------------------|----------------------------------------------------------------------------------------------------------------------------------------------------------------------------------------------------------------------------------------------------------------------------------------------------------------------------------------------------------------------------------------------------------------------------------------------------------------------------------------------------------------------------------------------------------------------------------------------------------------------------------------------------------------------------------------------------------------------------------------------------------------------------------------------------------------------------------------------------------------------------------------------------------------------------------------------------------------------------------------------------------------------------------------------------------------------------------------------------------------------------------------------------------------------------------------------------------------------------------------------------------------------------------------------------------------------------------------------------------------------------------------------------------------------------------------------------------------------------------------------------------------------------------------------------------------------------------------------------------------------------------------------------------------------------------------------------------------------------------------------------------------------------------------------------------------------------------------------------------------------------------------------------------------------------------------------------------------------------------------------------------------------------------------------------------------------------------------------------------------------------------------------------------------------------------------------------------------------------------------------------------------------------------------------------------------------------------------------------------------------------------------------------------------------------------------------------------------------------------------------------------------------------------------------------------------------------------------------------------------------------------------------------------------------------------------------------------------------------------------------------------------------------------------------------------------------------------------------------------------------------------------------------------------------------------------------------------------------------------------------------------------|
|                | <p>TRANSLATION</p> <p>TRANSPORT</p> <p>TRNA_METABOLIC_PROCESS<br/>VASCULATURE_DEVELOPMENT</p> <p>VESICLE_MEDIATED_TRANSPORT</p>                                                                                                                                                                                                                                                                                                                                                                                                                                                                                                                                                                                                                                                                                     | <p>AARS, CEBPG, DHPS, <u>EEF1A1</u>, EIF2B1, EIF2S3, EIF3C, EIF3E, EIF3F, EIF4A2, INHBB, NACA, RPL11, <u>RPL13</u>, <u>RPL18</u>, <u>RPL19</u>, <u>RPL23A</u>, <u>RPL26</u>, <u>RPL28</u>, <u>RPL30</u>, <u>RPL34</u>, <u>RPL35</u>, <u>RPL4</u>, <u>RPL5</u>, <u>RPL6</u>, <u>RPL7</u>, <u>RPL7A</u>, <u>RPL8</u>, <u>RPL9</u>, <u>RPS10</u>, <u>RPS11</u>, <u>RPS12</u>, <u>RPS2</u>, <u>RPS3</u>, <u>RPS3A</u>, <u>RPS5</u>, <u>RPS9</u>, <u>TLR3</u>, <u>TNIP1</u>, WARS, YARS</p> <p><u>ABCB11</u>, <u>ABCC2</u>, <u>ABCD3</u>, AGXT, <u>AHSG</u>, AIP, <u>ANGPTL3</u>, <u>AP3B1</u>, <u>APOA1</u>, <u>APOE</u>, <u>AQP9</u>, <u>ARCN1</u>, <u>BCL2</u>, <u>BCL2L1</u>, <u>CACNA1D</u>, <u>CALR</u>, <u>CAV1</u>, <u>CBL</u>, <u>CD74</u>, <u>CDH1</u>, <u>CHKA</u>, <u>CORO1C</u>, <u>CPNE3</u>, <u>DERL1</u>, <u>EDNRA</u>, <u>ERGIC3</u>, <u>FXYD1</u>, <u>GBF1</u>, <u>GJB2</u></p> <p>AARS, KARS, <u>POP4</u>, SARS, SSB, WARS, YARS</p> <p><u>ANGPTL3</u>, <u>C1GALT1</u>, <u>CANX</u>, <u>PLG</u>, <u>RUNX1</u>, <u>SHH</u>, <u>TGFB2</u>, <u>THY1</u></p> <p><u>AHSG</u>, <u>CBL</u>, <u>COPZ1</u>, <u>CORO1C</u>, <u>CPNE3</u>, <u>DOPEY2</u>, <u>ERGIC3</u>, <u>GBF1</u>, <u>GOSR2</u>, <u>KRT18</u>, <u>LMAN1</u>, <u>LRPAP1</u>, <u>PI4KB</u>, <u>PICALM</u>, <u>PPT1</u>, <u>RAB14</u>, <u>RAB1A</u>, <u>RAC1</u>, <u>RIMS1</u>, <u>SCIN</u>, <u>SEC22A</u>, <u>SEC23B</u>, <u>TMED10</u>, <u>TOM1</u>, <u>VPS33B</u></p>                                                                                                                                                                                                                                                                                                                                                                                                                                                                                                                                                                                                                                                                                                                                                                                                                                                                                                                                                                                                                                                                                                                                                                                                                                                                                                                                                                                                                                                                                                                                                                    |
| Down-regulated | <p>APOPTOTIC_NUCLEAR_CHANGES<br/>APOPTOTIC_PROGRAM</p> <p>CASPASE_ACTIVATION<br/>CELL_CYCLE_ARREST_GO_0007050<br/>CELL_DEVELOPMENT</p> <p>CELL_STRUCTURE_DISASSEMBLY_DURING_APOPTOSIS</p> <p>CHROMOSOME_SEGREGATION<br/>COVALENT_CHROMATIN_MODIFICATION<br/>DNA_METABOLIC_PROCESS</p> <p>DNA_PACKAGING<br/>DNA_REPAIR</p> <p>GROWTH</p> <p>INDUCTION_OF_APOPTOSIS_BY_EXTRACELLULAR_SIGNALS<br/>INDUCTION_OF_APOPTOSIS_BY_INTRACELLULAR_SIGNALS<br/>MICROTUBULE_BASED_PROCESS</p> <p>NEGATIVE_REGULATION_OF_CELL_CYCLE<br/>NEGATIVE_REGULATION_OF_GROWTH<br/>NUCLEAR_ORGANIZATION_AND_BIOGENESIS<br/>POSITIVE_REGULATION_OF_CASPASE_ACTIVITY<br/>POSITIVE_REGULATION_OF_DEVELOPMENTAL_PROCESS</p> <p>POSITIVE_REGULATION_OF_HYDROLASE_ACTIVITY<br/>RESPONSE_TO_HORMONE_STIMULUS<br/>RESPONSE_TO_OXIDATIVE_STRESS</p> | <p><u>AIFM1</u>, <u>BAX</u>, <u>CASP3</u>, <u>DFFB</u>, <u>TOP2A</u></p> <p><u>AIFM1</u>, <u>APAF1</u>, <u>BAD</u>, <u>BAX</u>, <u>CASP3</u>, <u>CASP8</u>, <u>CASP8AP2</u>, <u>DFFB</u>, <u>F2</u>, <u>LCK</u>, <u>TOP2A</u>, <u>TP53</u></p> <p><u>APAF1</u>, <u>BAX</u>, <u>CASP8AP2</u>, <u>F2</u>, <u>LCK</u>, <u>TP53</u></p> <p><u>BTG4</u>, <u>CDKN1B</u>, <u>CUL3</u>, <u>CUL5</u>, <u>PPM1G</u>, <u>TP53</u></p> <p><u>AIFM1</u>, <u>ANXA1</u>, <u>APAF1</u>, <u>BAD</u>, <u>BAX</u>, <u>BCL6</u>, <u>BOK</u>, <u>BTG1</u>, <u>BTG4</u>, <u>CASP3</u>, <u>CASP6</u>, <u>CASP8</u>, <u>CASP8AP2</u>, <u>CDK5R1</u>, <u>CDKN1B</u>, <u>CSE1L</u>, <u>CUL3</u>, <u>CUL5</u>, <u>DAZL</u>, <u>DDX41</u>, <u>DFFB</u>, <u>F2</u>, <u>GADD45B</u>, <u>GSTM3</u>, <u>GSTP1</u></p> <p><u>CHAF1A</u>, <u>DEFB</u>, <u>HELLS</u>, <u>MAP3K12</u>, <u>MSH2</u>, <u>NUSAP1</u>, <u>PHB</u>, <u>RSF1</u>, <u>TOP2A</u></p> <p><u>ARL8B</u>, <u>CENPF</u>, <u>NUSAP1</u>, <u>SRPK1</u>, <u>TOP2A</u></p> <p><u>HELLS</u>, <u>HTATIP</u>, <u>MAP3K12</u>, <u>MYST3</u>, <u>PHB</u></p> <p><u>AIFM1</u>, <u>BAX</u>, <u>CDT1</u>, <u>DFFB</u>, <u>DNMT3B</u>, <u>DUT</u>, <u>EGF</u>, <u>FEN1</u>, <u>GMNN</u>, <u>HELLS</u>, <u>HMGB2</u>, <u>MSH2</u>, <u>NOL8</u>, <u>PMS1</u>, <u>PMS2</u>, <u>RAD51</u>, <u>RAD52</u>, <u>TOP2A</u>, <u>TP53</u>, <u>UNG</u>, <u>XPC</u></p> <p><u>CHAF1A</u>, <u>DFFB</u>, <u>HELLS</u>, <u>NAP1L1</u>, <u>NUSAP1</u>, <u>RSF1</u>, <u>TOP2A</u></p> <p><u>FEN1</u>, <u>HMGB2</u>, <u>MSH2</u>, <u>PMS1</u>, <u>PMS2</u>, <u>RAD51</u>, <u>RAD52</u>, <u>TP53</u>, <u>UNG</u>, <u>XPC</u></p> <p><u>BCL6</u>, <u>BMPR1B</u>, <u>CAPRIN2</u>, <u>CDKN1B</u>, <u>ING5</u>, <u>RTN4RL2</u>, <u>TP53</u>, <u>XRN2</u></p> <p><u>BAX</u>, <u>CASP8AP2</u>, <u>DAXX</u>, <u>PDCD6</u>, <u>SST</u></p> <p><u>AIFM1</u>, <u>BAX</u>, <u>CUL3</u>, <u>CUL5</u>, <u>TP53</u></p> <p><u>GSN</u>, <u>KIF23</u>, <u>KIFAP3</u>, <u>LIMA1</u>, <u>LRPPRC</u>, <u>MID1IP1</u>, <u>NUSAP1</u>, <u>PRC1</u>, <u>RHOT2</u></p> <p><u>BTG4</u>, <u>CDKN1B</u>, <u>CUL3</u>, <u>CUL5</u>, <u>GMNN</u>, <u>PPM1G</u>, <u>TP53</u></p> <p><u>BCL6</u>, <u>CAPRIN2</u>, <u>CDKN1B</u>, <u>ING5</u>, <u>SERTAD2</u>, <u>TP53</u></p> <p><u>AIFM1</u>, <u>BAX</u>, <u>CASP3</u>, <u>DFFB</u>, <u>TOP2A</u></p> <p><u>APAF1</u>, <u>BAX</u>, <u>CASP8AP2</u>, <u>F2</u>, <u>LCK</u>, <u>TP53</u></p> <p><u>AIFM1</u>, <u>BAX</u>, <u>BCL6</u>, <u>BMPR1B</u>, <u>BOK</u>, <u>BTG1</u>, <u>CASP3</u>, <u>CASP6</u>, <u>CASP8AP2</u>, <u>CDK5R1</u>, <u>CDKN1B</u>, <u>CUL3</u>, <u>CUL5</u>, <u>LCK</u>, <u>PDCD6</u>, <u>PDCD7</u>, <u>SST</u>, <u>TNFSF10</u>, <u>TOP2A</u>, <u>TP53</u>, <u>TP53BP2</u>, <u>TRADD</u>, <u>TRAIIP</u></p> <p><u>APAF1</u>, <u>BAX</u>, <u>CASP8AP2</u>, <u>F2</u>, <u>LCK</u>, <u>TNNT2</u>, <u>TP53</u></p> <p><u>GATA3</u>, <u>GSTM3</u>, <u>KRT19</u>, <u>NCOA6</u>, <u>PDCD7</u></p> <p><u>ANGPTL7</u>, <u>APOA4</u>, <u>NUDT1</u>, <u>PRDX6</u>, <u>SEPP1</u></p> |
|                | Enriched KEGG gene sets (NES ≥1.5, NOM p-value ≤0.05 and FDR q-value ≤0.25) in zebrafish HCC (9 months)                                                                                                                                                                                                                                                                                                                                                                                                                                                                                                                                                                                                                                                                                                             | Enriched gene lists                                                                                                                                                                                                                                                                                                                                                                                                                                                                                                                                                                                                                                                                                                                                                                                                                                                                                                                                                                                                                                                                                                                                                                                                                                                                                                                                                                                                                                                                                                                                                                                                                                                                                                                                                                                                                                                                                                                                                                                                                                                                                                                                                                                                                                                                                                                                                                                                                                                                                                                                                                                                                                                                                                                                                                                                                                                                                                                                                                                            |
| Up-regulated   | <p>HSA00240_PYRIMIDINE_METABOLISM</p> <p>HSA00564_GLYCEROPHOSPHOLIPID_METABOLISM</p> <p>HSA00970_AMINOACYL_TRNA_BIOSYNTHESIS</p> <p>HSA03010_RIBOSOME</p> <p>HSA04010_MAPK_SIGNALING_PATHWAY</p> <p>HSA04012_ERBB_SIGNALING_PATHWAY</p> <p>HSA04060_CYTOKINE_CYTOKINE_RECEPTOR_INTERACTION</p>                                                                                                                                                                                                                                                                                                                                                                                                                                                                                                                      | <p><u>CTPS</u>, <u>DHODH</u>, <u>DPYD</u>, <u>ENTPD6</u>, <u>NME2</u>, <u>NME4</u>, <u>POLD2</u>, <u>RRM1</u>, <u>RRM2</u>, <u>TK1</u>, <u>TXNRD1</u>, <u>UPB1</u>, <u>UPP2</u></p> <p><u>AGPAT3</u>, <u>CDIPT</u>, <u>CHKA</u>, <u>CHPT1</u>, <u>ETNK1</u>, <u>GPD1</u></p> <p>AARS, <u>CARS</u>, <u>CARS2</u>, <u>EPRS</u>, <u>FARSA</u>, <u>HARS</u>, <u>KARS</u>, <u>QARS</u>, <u>SARS</u>, <u>TARS</u>, <u>WARS</u>, <u>YARS</u></p> <p><u>RPL10A</u>, <u>RPL13</u>, <u>RPL13A</u>, <u>RPL18</u>, <u>RPL19</u>, <u>RPL23A</u>, <u>RPL26</u>, <u>RPL28</u>, <u>RPL30</u>, <u>RPL34</u>, <u>RPL35</u>, <u>RPL35A</u>, <u>RPL36AL</u>, <u>RPL7</u>, <u>RPL8</u>, <u>RPL9</u>, <u>RPS10</u>, <u>RPS11</u>, <u>RPS12</u>, <u>RPS15A</u>, <u>RPS18</u>, <u>RPS2</u>, <u>RPS21</u>, <u>RPS24</u>, <u>RPS25</u>, <u>RPS26</u>, <u>RPS29</u>, <u>RPS3</u>, <u>RPS3A</u>, <u>RPS5</u>, <u>RPS7</u>, <u>RPS8</u>, <u>RPS9</u>, <u>RPSA</u></p> <p><u>AKT2</u>, <u>ARRB2</u>, <u>CACNA1D</u>, <u>CDC42</u>, <u>DUSP1</u>, <u>DUSP2</u>, <u>FGF10</u>, <u>FGF18</u>, <u>FGF23</u>, <u>FGF4</u>, <u>FGF5</u>, <u>FGF6</u>, <u>FGF8</u>, <u>FGFR1</u>, <u>FGFR2</u>, <u>FGFR4</u>, <u>FLNC</u>, <u>GADD45G</u>, <u>GRB2</u>, <u>JUN</u>, <u>MAPK1</u>, <u>MAPK3</u>, <u>MAPK8</u>, <u>MAPKAPK2</u>, <u>MEF2C</u>, <u>MKNK2</u>, <u>NLK</u>, <u>PDGFRA</u>, <u>PRKCB1</u>, <u>RAC1</u>, <u>RAC3</u>, <u>RAP1B</u>, <u>STMN1</u>, <u>TGFBI</u>, <u>TGFB2</u>, <u>TGFB3</u>, <u>TGFBR2</u></p> <p><u>AKT2</u>, <u>CAMK2D</u>, <u>CBL</u>, <u>GRB2</u>, <u>GSK3B</u>, <u>IUN</u>, <u>MAPK1</u>, <u>MAPK3</u>, <u>MAPK8</u>, <u>PIK3CA</u>, <u>PIK3R1</u>, <u>PRKCB1</u>, <u>SRC</u>, <u>STAT5B</u>, <u>CCL21</u>, <u>CXCL12</u>, <u>CXCR4</u>, <u>FLT1</u>, <u>IL15</u>, <u>INHBB</u>, <u>KITLG</u>, <u>MET</u>, <u>PDGFRA</u>, <u>PRL</u>, <u>TGFB1</u>, <u>TGFB2</u>, <u>TGFB3</u>, <u>TGFBR2</u></p>                                                                                                                                                                                                                                                                                                                                                                                                                                                                                                                                                                                                                                                                                                                                                                                                                                                                                                                                                                                                                                                                                                                      |

|                |                                                                                                                                                                                                                                                                                                                                                                                                                                                                                                                                                                                                                                                                                                   |                                                                                                                                                                                                                                                                                                                                                                                                                                                                                                                                                                                                                                                                                                                                                                                                                                                                                                                                                                                                                                                                                                                                                                                                                                                                                                                                                                                                                                                                                                                                                                                                                                                                                                                                                                                                                                                                                                                                                                                                    |
|----------------|---------------------------------------------------------------------------------------------------------------------------------------------------------------------------------------------------------------------------------------------------------------------------------------------------------------------------------------------------------------------------------------------------------------------------------------------------------------------------------------------------------------------------------------------------------------------------------------------------------------------------------------------------------------------------------------------------|----------------------------------------------------------------------------------------------------------------------------------------------------------------------------------------------------------------------------------------------------------------------------------------------------------------------------------------------------------------------------------------------------------------------------------------------------------------------------------------------------------------------------------------------------------------------------------------------------------------------------------------------------------------------------------------------------------------------------------------------------------------------------------------------------------------------------------------------------------------------------------------------------------------------------------------------------------------------------------------------------------------------------------------------------------------------------------------------------------------------------------------------------------------------------------------------------------------------------------------------------------------------------------------------------------------------------------------------------------------------------------------------------------------------------------------------------------------------------------------------------------------------------------------------------------------------------------------------------------------------------------------------------------------------------------------------------------------------------------------------------------------------------------------------------------------------------------------------------------------------------------------------------------------------------------------------------------------------------------------------------|
|                | <p>HSA04110_CELL_CYCLE</p> <p>HSA04150_MTOR_SIGNALING_PATHWAY<br/>HSA04310_WNT_SIGNALING_PATHWAY</p> <p>HSA04350_TGF_BETA_SIGNALING_PATHWAY</p> <p>HSA04370_VEGF_SIGNALING_PATHWAY</p> <p>HSA04510_FOCAL_ADHESION</p> <p>HSA04520_ADHERENS_JUNCTION</p> <p>HSA04610_COMPLEMENT_AND_COAGULATION_CASCADES</p> <p>HSA04620_TOLL_LIKE_RECEPTOR_SIGNALING_PATHWAY</p> <p>HSA04630_JAK_STAT_SIGNALING_PATHWAY</p> <p>HSA04660_T_CELL_RECEPTOR_SIGNALING_PATHWAY</p> <p>HSA04662_B_CELL_RECEPTOR_SIGNALING_PATHWAY</p> <p>HSA04664_FC_EPSILON_RI_SIGNALING_PATHWAY</p> <p>HSA04810_REGULATION_OF_ACTIN_CYTOSKELETON</p> <p>HSA04910_INSULIN_SIGNALING_PATHWAY</p> <p>HSA04912_GNRH_SIGNALING_PATHWAY</p> | <p>CCNA2, CCNB1, CCNB2, CCND1, CCNE1, CDC2, CDC20, CDC25A, CDC27, CDC45L, GADD45G, GSK3B, MCM2, MCM3, MCM4, MCM5, MCM6, MCM7, MDM2, TFDPI, TGFBI, TGFBI2, TGFBI3, YWHAB</p> <p>AKT2, IGF1, MAPK1, MAPK3, PIK3CA, PIK3R1, VEGFC, CAMK2D, CCND1, CER1, CSNK2A1, CSNK2B, CTBP1, CTNNA1, FZD8, GSK3B, JUN, MAPK8, NLK, PPAR, PRKCB1, RAC1, RAC3, RHOA, ROCK2, TCF7, TCF7L2, VANGL1, WNT16, WNT2B, WNT4</p> <p>GDF7, ID1, ID2, INHBB, MAPK1, MAPK3, NODAL, NOG, RHOA, ROCK2, SMAD7, SP1, TFDPI, TGFBI, TGFBI2, TGFBI3, TGFBR2</p> <p>AKT2, CDC42, MAPK1, MAPK3, MAPKAPK2, PIK3CA, PIK3R1, PRKCB1, RAC1, RAC3, SRC</p> <p>AKT2, BCL2, BIRC2, CAV1, CCND1, CDC42, COL1A2, CTNNA1, FLNC, FLT1, FYN, GRB2, GSK3B, IGF1, JUN, LAMB1, MAPK1, MAPK3, MAPK8, MET, PARVA, PARVB, PDGFRA, PIK3CA, PIK3R1, PPP1CB, PRKCB1, RAC1, RAC3, RAP1B, RHOA, ROCK2, SRC, TLN1, VAV3, VEGFC, VTN</p> <p>CDC42, CDH1, CSNK2A1, CSNK2B, CTNNA1, FGFR1, FYN, MAPK1, MAPK3, MET, NLK, RAC1, RAC3, RHOA, SRC, TCF7, TCF7L2, TGFBR2</p> <p>A2M, C1S, C3, C8G, C9, CFB, CFH, FGA, FGB, FGG, MASP2, PLG, PROC, SERPINA1, SERPINC1, SERPIND1, SERPINF2</p> <p>AKT2, CHUK, FOS, JUN, MAPK1, MAPK3, MAPK8, MYD88, PIK3CA, PIK3R1, PIK3R3, RAC1, RELA, STAT1, TLR3</p> <p>AKT2, BCL2L1, CBL, CCND1, GRB2, IL15, JAK1, PIK3CA, PIK3R1, PIM1, PRL, SPRY4, STAM, STAT3, STAT5B</p> <p>AKT2, CBL, CDC42, FYN, GRB2, JUN, PIK3CA, PIK3R1, RHOA, VAV3</p> <p>AKT2, GSK3B, JUN, PIK3CA, PIK3R1, PRKCB1, RAC1, RAC3, VAV3</p> <p>AKT2, FYN, GRB2, MAPK1, MAPK3, MAPK8, PIK3CA, PIK3R1, PRKCB1, RAC1, RAC3, VAV3</p> <p>ARPC2, ARPC5, CDC42, EGF10, EGF18, EGF23, EGF4, EGF5, EGF6, EGF8, EGFR1, EGFR2, EGFR4, ITGA5, MAPK1, MAPK3, MYH10, PDGFRA, PIK3CA, PIK3R1, PPP1CB, RAC1, RAC3, RDX, RHOA, ROCK2, SCIN, VAV3</p> <p>AKT2, CALM2, CBL, FLOT2, GRB2, GSK3B, GYS2, MAPK1, MAPK3, MAPK8, MKNK2, PCK1, PFKL, PIK3CA, PIK3R1, PKLR, PPP1CB, PPP1R3C</p> <p>CACNA1D, CALM2, CAMK2D, CDC42, GRB2, JUN, MAPK1, MAPK3, MAPK8, MMP14, PRKCB1, SRC</p> |
| Down-regulated | <p>HSA00010_GLYCOLYSIS_AND_GLUCCONEOGENESIS</p> <p>HSA00071_FATTY_ACID_METABOLISM</p> <p>HSA04210_APOPTOSIS</p> <p>HSA04512_ECM_RECEPTOR_INTERACTION</p>                                                                                                                                                                                                                                                                                                                                                                                                                                                                                                                                          | <p>ADH5, ALDH2, ALDH7A1, ALDH9A1, ALDOC, BPGM, GAPDH, HK2, LDHA, PDHA1, PFKM, PGAM2, PKM2, TPI1</p> <p>ACSL1, ACSL5, ADH5, ALDH2, ALDH7A1, ALDH9A1, CPT2, HADHB</p> <p>AIFM1, APAF1, BAD, BAX, CAPN2, CASP3, CASP6, CASP8, CHP, DFFB, TNFSF10, TP53, TRADD</p> <p>CD36, COL1A1, COL11A2, COL2A1, COL4A6, COL6A1, FN1, HMMR, ITGA2, ITGA3, ITGB4, LAMA4</p>                                                                                                                                                                                                                                                                                                                                                                                                                                                                                                                                                                                                                                                                                                                                                                                                                                                                                                                                                                                                                                                                                                                                                                                                                                                                                                                                                                                                                                                                                                                                                                                                                                         |
