# Supplementary material for: A high level of liver-specific expression of oncogenic KrasV12 drives robust liver tumorigenesis in transgenic zebrafish
Source: PubMed Central journal article supplement — Dis Model Mech. 2011 Jul 4;4(6):801–13. doi: 10.1242/dmm.007831 (PMC3209649; doi:10.1242/dmm.007831), 2011-07-04
Supplement: supp_007831_DMM007831TableS3.pdf [file supp_007831_DMM007831TableS3.pdf]

**Table S3. Stage-specific and overlapping enriched genes in zebrafish liver hyperplasia and carcinoma.** By comparing the enriched genes (supplementary material Table S2) between hyperplasia and carcinoma, we obtained stage-specific and overlapping enriched genes which were similarly regulated in both stages. The gene symbol and gene name of each gene (human homologue) are shown.

|         |                                                                                 |
|---------|---------------------------------------------------------------------------------|
| ACSL5   | Acyl-CoA synthetase long-chain family member 5                                  |
| ADSSL1  | Adenylosuccinate synthase like 1                                                |
| APOA4   | Apolipoprotein A-IV                                                             |
| AVP     | Arginine vasopressin                                                            |
| C3orf31 | Chromosome 3 open reading frame 31                                              |
| CAB39   | Calcium binding protein 39                                                      |
| CALCB   | Calcitonin-related polypeptide beta                                             |
| CAMK2A  | Calcium/calmodulin-dependent protein kinase II alpha                            |
| CDO1    | Cysteine dioxygenase, type I                                                    |
| CEL     | Carboxyl ester lipase (bile salt-stimulated lipase)                             |
| COX17   | COX17 cytochrome c oxidase assembly homolog (S. cerevisiae)                     |
| CTBP1   | C-terminal binding protein 1                                                    |
| CUL5    | Cullin 5                                                                        |
| CYP2J2  | Cytochrome P450, family 2, subfamily J, polypeptide 2                           |
| DDB1    | Damage-specific DNA binding protein 1, 127kDa                                   |
| DRD2    | Dopamine receptor D2                                                            |
| DUSP5   | Dual specificity phosphatase 5                                                  |
| DUSP6   | Dual specificity phosphatase 6                                                  |
| EDF1    | Endothelial differentiation-related factor 1                                    |
| ESR2    | Estrogen receptor 2 (ER beta)                                                   |
| F10     | Coagulation factor X                                                            |
| F2      | Coagulation factor II (thrombin)                                                |
| F7      | Coagulation factor VII (serum prothrombin conversion accelerator)               |
| F9      | Coagulation factor IX                                                           |
| FABP2   | Fatty acid binding protein 2, intestinal                                        |
| FGD1    | FYVE, RhoGEF and PH domain containing 1                                         |
| FZD8    | Frizzled homolog 8 (Drosophila)                                                 |
| GADD45A | Growth arrest and DNA-damage-inducible, alpha                                   |
| GDA     | Guanine deaminase                                                               |
| GK      | Glycerol kinase                                                                 |
| GNG12   | Guanine nucleotide binding protein (G protein), gamma 12                        |
| HIRA    | HIR histone cell cycle regulation defective homolog A (S. cerevisiae)           |
| HSBP1   | Heat shock factor binding protein 1                                             |
| JUNB    | Jun B proto-oncogene                                                            |
| KIN     | KIN, antigenic determinant of recA protein homolog (mouse)                      |
| LDB1    | LIM domain binding 1                                                            |
| LIPA    | Lipase A, lysosomal acid, cholesterol esterase                                  |
| LIPC    | Lipase, hepatic                                                                 |
| MAFA    | v-Maf musculoaponeurotic fibrosarcoma oncogene homolog A (avian)                |
| MAP3K12 | Mitogen-activated protein kinase kinase kinase 12                               |
| MAPT    | Microtubule-associated protein tau                                              |
| MDFIC   | MyoD family inhibitor domain containing                                         |
| MGST1   | Microsomal glutathione S-transferase 1                                          |
| MRE11A  | MRE11 meiotic recombination 11 homolog A (S. cerevisiae)                        |
| MSH2    | MutS homolog 2, colon cancer, nonpolyposis type 1 (E. coli)                     |
| MSH6    | MutS homolog 6 (E. coli)                                                        |
| MTF1    | Metal-regulatory transcription factor 1                                         |
| MTTP    | Microsomal triglyceride transfer protein                                        |
| NARG1   | N(alpha)-acetyltransferase 15, NatA auxiliary subunit                           |
| NFIL3   | Nuclear factor, interleukin 3 regulated                                         |
| NFKB2   | Nuclear factor of kappa light polypeptide gene enhancer in B-cells 2 (p49/p100) |
| NFYA    | Nuclear transcription factor Y, alpha                                           |
| NKX2-5  | NK2 transcription factor related, locus 5 (Drosophila)                          |
| NMI     | N-myc (and STAT) interactor                                                     |
| NR2F2   | Nuclear receptor subfamily 2, group F, member 2                                 |
