# Supplementary material for: A high level of liver-specific expression of oncogenic KrasV12 drives robust liver tumorigenesis in transgenic zebrafish
Source: PubMed Central journal article supplement — Dis Model Mech. 2011 Jul 4;4(6):801–13. doi: 10.1242/dmm.007831 (PMC3209649; doi:10.1242/dmm.007831), 2011-07-04
Supplement: supp_007831_DMM007831TableS5.pdf [file supp_007831_DMM007831TableS5.pdf]

**Table S5. Potential HCC-specific gene signature restricted only to human HCC.**

Comparison of genes within the up-regulated HCC-specific zebrafish enriched genes (supplementary material Table S4) as identified by GSEA cross-species analysis of different human tumor data sets yielded a subset list of 48 genes. These genes were enriched only in human HCC.

| No. | Gene Symbol | Gene Name                                                        |
|-----|-------------|------------------------------------------------------------------|
| 1   | ANGPT1      | Angiopoietin 1                                                   |
| 2   | APOM        | Apolipoprotein M                                                 |
| 3   | ARRB2       | Arrestin, beta 2                                                 |
| 4   | CACNA1D     | Calcium channel, voltage-dependent, L type, alpha 1D subunit     |
| 5   | CCL21       | Chemokine (C-C motif) ligand 21                                  |
| 6   | CDC42EP4    | CDC42 effector protein (Rho GTPase binding) 4                    |
| 7   | CDIPT       | CDP-diacylglycerol--inositol 3-phosphatidyltransferase           |
| 8   | EIF4A2      | Eukaryotic translation initiation factor 4A2                     |
| 9   | FBXO11      | F-box protein 11                                                 |
| 10  | GBF1        | Golgi brefeldin A resistant guanine nucleotide exchange factor 1 |
| 11  | GPR34       | G protein-coupled receptor 34                                    |
| 12  | HS6ST1      | Heparan sulfate 6-O-sulfotransferase 1                           |
| 13  | MDM4        | Mdm4 p53 binding protein homolog (mouse)                         |
| 14  | MOBKL1A     | MOB1, Mps One Binder kinase activator-like 1A (yeast)            |
| 15  | MR1         | Major histocompatibility complex, class I-related                |
| 16  | NPM1        | Nucleophosmin (nucleolar phosphoprotein B23, numatrin)           |
| 17  | PPP1CB      | Protein phosphatase 1, catalytic subunit, beta isozyme           |
| 18  | RAB3GAP2    | RAB3 GTPase activating protein subunit 2 (non-catalytic)         |
| 19  | RHOT1       | Ras homolog gene family, member T1                               |
| 20  | RPL10A      | Ribosomal protein L10a                                           |
| 21  | RPL13       | Ribosomal protein L13                                            |
| 22  | RPL18       | Ribosomal protein L18                                            |
| 23  | RPL19       | Ribosomal protein L19                                            |
| 24  | RPL23A      | Ribosomal protein L23a                                           |
| 25  | RPL30       | Ribosomal protein L30                                            |
| 26  | RPL35       | Ribosomal protein L35                                            |
| 27  | RPL4        | Ribosomal protein L4                                             |
| 28  | RPL5        | Ribosomal protein L5                                             |
| 29  | RPL7        | Ribosomal protein L7                                             |
| 30  | RPL7A       | Ribosomal protein L7a                                            |
| 31  | RPL8        | Ribosomal protein L8                                             |
| 32  | RPL9        | Ribosomal protein L9                                             |
| 33  | RPS10       | Ribosomal protein S10                                            |
| 34  | RPS11       | Ribosomal protein S11                                            |
| 35  | RPS18       | Ribosomal protein S18                                            |
| 36  | RPS2        | Ribosomal protein S2                                             |
| 37  | RPS21       | Ribosomal protein S21                                            |
| 38  | RPS3        | Ribosomal protein S3                                             |
| 39  | RPS5        | Ribosomal protein S5                                             |

|    |         |                                                                               |
|----|---------|-------------------------------------------------------------------------------|
| 40 | RPS7    | Ribosomal protein S7                                                          |
| 41 | RPS8    | Ribosomal protein S8                                                          |
| 42 | SLC25A3 | Solute carrier family 25 (mitochondrial carrier; phosphate carrier), member 3 |
| 43 | STAT5B  | Signal transducer and activator of transcription 5B                           |
| 44 | STMN1   | Stathmin 1                                                                    |
| 45 | TBX2    | T-box 2                                                                       |
| 46 | TTN     | Titin                                                                         |
| 47 | UBE2D2  | Ubiquitin-conjugating enzyme E2D 2 (UBC4/5 homolog, yeast)                    |
| 48 | VAV3    | Vav 3 guanine nucleotide exchange factor                                      |
