# Supplementary material for: A high level of liver-specific expression of oncogenic KrasV12 drives robust liver tumorigenesis in transgenic zebrafish
Source: PubMed Central journal article supplement — Dis Model Mech. 2011 Jul 4;4(6):801–13. doi: 10.1242/dmm.007831 (PMC3209649; doi:10.1242/dmm.007831), 2011-07-04
Supplement: supp_007831_DMM007831TableS6.pdf [file supp_007831_DMM007831TableS6.pdf]

**Table S6. Lists of up-regulated hyperplasia zebrafish enriched genes in human dysplastic liver data sets.** The hyperplasia up-regulated zebrafish enriched genes, comprising of hyperplasia-specific and overlapping enriched genes in both stages, were significantly associated with human dysplastic liver (GSE6764) (FDR q-value  $\leq 0.05$  and FWER p-value  $\leq 0.05$ ). GSEA identified the genes from this gene list which contributed maximally to the GSEA scores of human dysplastic liver transcriptomic profiles.

| <b>Zebrafish up-regulated hyperplasia enriched genes in human dysplastic liver (GSE6764)</b> |             |                                                       |
|----------------------------------------------------------------------------------------------|-------------|-------------------------------------------------------|
| No.                                                                                          | Gene Symbol | Gene Name                                             |
| 1                                                                                            | A2M         | Alpha-2-macroglobulin                                 |
| 2                                                                                            | ADSSL1      | Adenylosuccinate synthase like 1                      |
| 3                                                                                            | AGXT        | Alanine-glyoxylate aminotransferase                   |
| 4                                                                                            | AHSG        | Alpha-2-HS-glycoprotein                               |
| 5                                                                                            | APOA1       | Apolipoprotein A-I                                    |
| 6                                                                                            | APOE        | Apolipoprotein E                                      |
| 7                                                                                            | AVP         | Arginine vasopressin                                  |
| 8                                                                                            | C1S         | Complement component 1, s subcomponent                |
| 9                                                                                            | C8G         | Complement component 8, gamma polypeptide             |
| 10                                                                                           | CAB39       | Calcium binding protein 39                            |
| 11                                                                                           | CALR        | Calreticulin                                          |
| 12                                                                                           | CCNB1       | Cyclin B1                                             |
| 13                                                                                           | CCND1       | Cyclin D1                                             |
| 14                                                                                           | CDC25A      | Cell division cycle 25 homolog A (S. pombe)           |
| 15                                                                                           | CDO1        | Cysteine dioxygenase, type I                          |
| 16                                                                                           | CFB         | Complement factor B                                   |
| 17                                                                                           | CFH         | Complement factor H                                   |
| 18                                                                                           | CP          | Ceruloplasmin (ferroxidase)                           |
| 19                                                                                           | CTBP1       | C-terminal binding protein 1                          |
| 20                                                                                           | CYP2J2      | Cytochrome P450, family 2, subfamily J, polypeptide 2 |
| 21                                                                                           | DERL1       | Der1-like domain family, member 1                     |
| 22                                                                                           | DUSP5       | Dual specificity phosphatase 5                        |
| 23                                                                                           | DUSP6       | Dual specificity phosphatase 6                        |
| 24                                                                                           | EDF1        | Endothelial differentiation-related factor 1          |
| 25                                                                                           | F10         | Coagulation factor X                                  |
| 26                                                                                           | F7          | Coagulation factor II (thrombin)                      |
| 27                                                                                           | FGA         | Fibrinogen alpha chain                                |
| 28                                                                                           | FGD1        | FYVE, RhoGEF and PH domain containing 1               |
| 29                                                                                           | FYN         | FYN oncogene related to SRC, FGR, YES                 |
| 30                                                                                           | GADD45A     | Growth arrest and DNA-damage-inducible, alpha         |
| 31                                                                                           | GATA6       | GATA binding protein 6                                |
| 32                                                                                           | GDA         | Guanine deaminase                                     |

|    |          |                                                                                     |
|----|----------|-------------------------------------------------------------------------------------|
| 33 | GGT1     | Gamma-glutamyltransferase 1                                                         |
| 34 | GK       | Glycerol kinase                                                                     |
| 35 | GPX1     | Glutathione peroxidase 1                                                            |
| 36 | IGF1     | Insulin-like growth factor 1 (somatomedin C)                                        |
| 37 | LDB1     | LIM domain binding 1                                                                |
| 38 | LIPA     | Lipase A, lysosomal acid, cholesterol esterase                                      |
| 39 | MAFB     | v-Maf musculoaponeurotic fibrosarcoma oncogene homolog B (avian)                    |
| 40 | MAP3K12  | Mitogen-activated protein kinase kinase kinase 12                                   |
| 41 | MAPK1    | Mitogen-activated protein kinase 1                                                  |
| 42 | MAPK3    | Mitogen-activated protein kinase 3                                                  |
| 43 | MAPKAPK2 | Mitogen-activated protein kinase-activated protein kinase 2                         |
| 44 | MBP      | Myelin basic protein                                                                |
| 45 | MCM5     | Minichromosome maintenance complex component 5                                      |
| 46 | MDM2     | Mdm2 p53 binding protein homolog (mouse)                                            |
| 47 | MGST1    | Microsomal glutathione S-transferase 1                                              |
| 48 | MMP14    | Matrix metalloproteinase 14 (membrane-inserted)                                     |
| 49 | MRE11A   | MRE11 meiotic recombination 11 homolog A (S. cerevisiae)                            |
| 50 | NARG1    | N(alpha)-acetyltransferase 15, NatA auxiliary subunit                               |
| 51 | NBN      | Nibrin                                                                              |
| 52 | NFIL3    | Nuclear factor, interleukin 3 regulated                                             |
| 53 | NFKB2    | Nuclear factor of kappa light polypeptide gene enhancer in B-cells 2 (p49/p100)     |
| 54 | NFYA     | Nuclear transcription factor Y, alpha                                               |
| 55 | NLK      | Nemo-like kinase                                                                    |
| 56 | NMI      | N-myc (and STAT) interactor                                                         |
| 57 | PCNA     | Proliferating cell nuclear antigen                                                  |
| 58 | PDE8B    | Phosphodiesterase 8B                                                                |
| 59 | PDGFRA   | Platelet-derived growth factor receptor, alpha polypeptide                          |
| 60 | PIK3CA   | Phosphoinositide-3-kinase, catalytic, alpha polypeptide                             |
| 61 | PLG      | Plasminogen                                                                         |
| 62 | POLB     | Polymerase (DNA directed), beta                                                     |
| 63 | PPARD    | Peroxisome proliferator-activated receptor delta                                    |
| 64 | PPM1G    | Protein phosphatase, Mg <sup>2+</sup> /Mn <sup>2+</sup> dependent, 1G               |
| 65 | PRKACA   | Protein kinase, cAMP-dependent, catalytic, alpha                                    |
| 66 | PRKCB1   | Protein kinase C, beta                                                              |
| 67 | PXN      | Paxillin                                                                            |
| 68 | ROBO2    | Roundabout, axon guidance receptor, homolog 2 (Drosophila)                          |
| 69 | RRM2     | Ribonucleotide reductase M2                                                         |
| 70 | RTN4RL1  | Reticulon 4 receptor-like 1                                                         |
| 71 | RUVBL2   | RuvB-like 2 (E. coli)                                                               |
| 72 | SERPINA1 | Serpin peptidase inhibitor, clade A (alpha-1 antiproteinase, antitrypsin), member 1 |
| 73 | SERPINC1 | Serpin peptidase inhibitor, clade C (antithrombin), member 1                        |
| 74 | SRC      | v-Src sarcoma (Schmidt-Ruppin A-2) viral oncogene homolog (avian)                   |
| 75 | THY1     | Thy-1 cell surface antigen                                                          |
| 76 | TINF2    | TERF1 (TRF1)-interacting nuclear factor 2                                           |
| 77 | TK1      | Thymidine kinase 1, soluble                                                         |
| 78 | UBC      | Ubiquitin C                                                                         |
| 79 | WNT16    | Wingless-type MMTV integration site family, member 16                               |
| 80 | XPC      | Xeroderma pigmentosum, complementation group C                                      |
| 81 | YWHAB    | Tyrosine 3-monooxygenase/tryptophan 5-monooxygenase activation protein,             |

beta polypeptide
