# Supplementary material for: A high level of liver-specific expression of oncogenic KrasV12 drives robust liver tumorigenesis in transgenic zebrafish
Source: PubMed Central journal article supplement — Dis Model Mech. 2011 Jul 4;4(6):801–13. doi: 10.1242/dmm.007831 (PMC3209649; doi:10.1242/dmm.007831), 2011-07-04
Supplement: supp_007831_DMM007831TableS7.pdf [file supp_007831_DMM007831TableS7.pdf]

**Table S7. Lists of up-regulated HCC zebrafish enriched genes in human HCC data sets.**

The HCC up-regulated zebrafish enriched genes, comprising of carcinoma-specific and overlapping enriched genes in both stages, were significantly associated with human HCC (GSE6764) (FDR q-value  $\leq 0.05$  and FWER p-value  $\leq 0.05$ ). GSEA identified the genes from this gene list which contributed maximally to the GSEA score of human HCC transcriptomic profiles.

| <b>Zebrafish up-regulated HCC enriched genes in human hepatocellular carcinoma (GSE6764)</b> |             |                                                                                     |
|----------------------------------------------------------------------------------------------|-------------|-------------------------------------------------------------------------------------|
| No.                                                                                          | Gene Symbol | Gene Name                                                                           |
| 1                                                                                            | ABCC2       | ATP-binding cassette, sub-family C (CFTR/MRP), member 2                             |
| 2                                                                                            | ABI1        | Abl-interactor 1                                                                    |
| 3                                                                                            | ADAM10      | ADAM metalloproteinase domain 10                                                    |
| 4                                                                                            | AHR         | Aryl hydrocarbon receptor                                                           |
| 5                                                                                            | AIP         | Aryl hydrocarbon receptor interacting protein                                       |
| 6                                                                                            | ALCAM       | Activated leukocyte cell adhesion molecule                                          |
| 7                                                                                            | ANGPT1      | Angiopoietin 1                                                                      |
| 8                                                                                            | ANXA11      | Annexin A11                                                                         |
| 9                                                                                            | AP3B1       | Adaptor-related protein complex 3, beta 1 subunit                                   |
| 10                                                                                           | APOE        | Apolipoprotein E                                                                    |
| 11                                                                                           | APOM        | Apolipoprotein M                                                                    |
| 12                                                                                           | ARHGEF2     | Rho/Rac guanine nucleotide exchange factor (GEF) 2                                  |
| 13                                                                                           | ARPC2       | Actin related protein 2/3 complex, subunit 2, 34kDa                                 |
| 14                                                                                           | ARPC5       | Actin related protein 2/3 complex, subunit 5, 16kDa                                 |
| 15                                                                                           | ARRB2       | Arrestin, beta 2                                                                    |
| 16                                                                                           | ASNS        | Asparagine synthetase (glutamine-hydrolyzing)                                       |
| 17                                                                                           | BAG2        | BCL2-associated athanogene 2                                                        |
| 18                                                                                           | BCR         | Breakpoint cluster region                                                           |
| 19                                                                                           | BIRC5       | Baculoviral IAP repeat-containing 5                                                 |
| 20                                                                                           | BRD7        | Bromodomain containing 7                                                            |
| 21                                                                                           | BSG         | Basigin (Ok blood group)                                                            |
| 22                                                                                           | C1GALT1     | Core 1 synthase, glycoprotein-N-acetylgalactosamine 3-beta-galactosyltransferase, 1 |
| 23                                                                                           | CACNA1D     | Calcium channel, voltage-dependent, L type, alpha 1D subunit                        |
| 24                                                                                           | CANX        | Calnexin                                                                            |
| 25                                                                                           | CAV1        | Caveolin 1, caveolae protein, 22kDa                                                 |
| 26                                                                                           | CBL         | Cas-Br-M (murine) ecotropic retroviral transforming sequence                        |
| 27                                                                                           | CCL21       | Chemokine (C-C motif) ligand 21                                                     |
| 28                                                                                           | CCNA2       | Cyclin A2                                                                           |
| 29                                                                                           | CCNB1       | Cyclin B1                                                                           |
| 30                                                                                           | CCNB2       | Cyclin B2                                                                           |
| 31                                                                                           | CCNE1       | Cyclin E1                                                                           |

|    |          |                                                                           |
|----|----------|---------------------------------------------------------------------------|
| 32 | CCNG2    | Cyclin G2                                                                 |
| 33 | CCT4     | Chaperonin containing TCP1, subunit 4 (delta)                             |
| 34 | CCT6A    | Chaperonin containing TCP1, subunit 6A (zeta 1)                           |
| 35 | CCT7     | Chaperonin containing TCP1, subunit 7 (eta)                               |
| 36 | CD74     | CD74 molecule, major histocompatibility complex, class II invariant chain |
| 37 | CD9      | CD9 molecule                                                              |
| 38 | CDC2     | Cyclin-dependent kinase 1                                                 |
| 39 | CDC20    | Cell division cycle 20 homolog (S. cerevisiae)                            |
| 40 | CDC25A   | Cell division cycle 25 homolog A (S. pombe)                               |
| 41 | CDC27    | Cell division cycle 27 homolog (S. cerevisiae)                            |
| 42 | CDC42EP4 | CDC42 effector protein (Rho GTPase binding) 4                             |
| 43 | CDC45L   | Cell division cycle 45 homolog (S. cerevisiae)                            |
| 44 | CDIPT    | CDP-diacylglycerol--inositol 3-phosphatidyltransferase                    |
| 45 | CHKA     | Choline kinase alpha                                                      |
| 46 | COL1A2   | Collagen, type I, alpha 2                                                 |
| 47 | CORO1C   | Coronin, actin binding protein, 1C                                        |
| 48 | CPNE3    | Copine III                                                                |
| 49 | CSNK2A1  | Casein kinase 2, alpha 1 polypeptide                                      |
| 50 | CSNK2B   | Casein kinase 2, beta polypeptide                                         |
| 51 | CTNNB1   | Catenin (cadherin-associated protein), beta 1, 88kDa                      |
| 52 | CTSK     | Cathepsin K                                                               |
| 53 | CXCR4    | Chemokine (C-X-C motif) receptor 4                                        |
| 54 | DBN1     | Drebrin 1                                                                 |
| 55 | DERL1    | Der1-like domain family, member 1                                         |
| 56 | DLG1     | Discs, large homolog 1 (Drosophila)                                       |
| 57 | DNAJA1   | DnaJ (Hsp40) homolog, subfamily A, member 1                               |
| 58 | DUSP2    | Dual specificity phosphatase 2                                            |
| 59 | ECT2     | Epithelial cell transforming sequence 2 oncogene                          |
| 60 | EDNRA    | Endothelin receptor type A                                                |
| 61 | EIF4A2   | Eukaryotic translation initiation factor 4A2                              |
| 62 | ENPP2    | Ectonucleotide pyrophosphatase/phosphodiesterase 2                        |
| 63 | ERGIC3   | ERGIC and golgi 3                                                         |
| 64 | EXT1     | Exostosin 1                                                               |
| 65 | FBXO11   | F-box protein 11                                                          |
| 66 | FGFR4    | Fibroblast growth factor receptor 4                                       |
| 67 | FLNC     | Filamin C, gamma                                                          |
| 68 | FTH1     | Ferritin, heavy polypeptide 1                                             |
| 69 | GAD1     | Glutamate decarboxylase 1 (brain, 67kDa)                                  |
| 70 | GBF1     | Golgi brefeldin A resistant guanine nucleotide exchange factor 1          |
| 71 | GPR34    | G protein-coupled receptor 34                                             |
| 72 | GRB2     | Growth factor receptor-bound protein 2                                    |
| 73 | HS6ST1   | Heparan sulfate 6-O-sulfotransferase 1                                    |
| 74 | HSP90AA1 | Heat shock protein 90kDa alpha (cytosolic), class A member 1              |
| 75 | HSPD1    | Heat shock 60kDa protein 1 (chaperonin)                                   |
| 76 | IL15     | Interleukin 15                                                            |
| 77 | KITLG    | KIT ligand                                                                |
| 78 | KRT18    | Keratin 18                                                                |
| 79 | LAMB1    | Laminin, beta 1                                                           |
| 80 | LPL      | Lipoprotein lipase                                                        |
| 81 | MAPK1    | Mitogen-activated protein kinase 1                                        |

|     |          |                                                                                         |
|-----|----------|-----------------------------------------------------------------------------------------|
| 82  | MAPK3    | Mitogen-activated protein kinase 3                                                      |
| 83  | MAPKAPK2 | Mitogen-activated protein kinase-activated protein kinase 2                             |
| 84  | MAPRE1   | Microtubule-associated protein, RP/EB family, member 1                                  |
| 85  | MCM2     | Minichromosome maintenance complex component 2                                          |
| 86  | MCM3     | Minichromosome maintenance complex component 3                                          |
| 87  | MCM4     | Minichromosome maintenance complex component 4                                          |
| 88  | MCM5     | Minichromosome maintenance complex component 5                                          |
| 89  | MCM6     | Minichromosome maintenance complex component 6                                          |
| 90  | MCM7     | Minichromosome maintenance complex component 7                                          |
| 91  | MDM2     | Mdm2 p53 binding protein homolog (mouse)                                                |
| 92  | MDM4     | Mdm4 p53 binding protein homolog (mouse)                                                |
| 93  | MET      | Met proto-oncogene (hepatocyte growth factor receptor)                                  |
| 94  | MMP14    | Matrix metalloproteinase 14 (membrane-inserted)                                         |
| 95  | MOBK1A   | MOB1, Mps One Binder kinase activator-like 1A (yeast)                                   |
| 96  | MR1      | Major histocompatibility complex, class I-related                                       |
| 97  | NBN      | Nibrin                                                                                  |
| 98  | NCKIPSD  | NCK interacting protein with SH3 domain                                                 |
| 99  | NLK      | Nemo-like kinase                                                                        |
| 100 | NPM1     | Nucleophosmin (nucleolar phosphoprotein B23, numatrin)                                  |
| 101 | NUP107   | Nucleoporin 107kDa                                                                      |
| 102 | PA2G4    | Proliferation-associated 2G4, 38kDa                                                     |
| 103 | PARVB    | Parvin, beta                                                                            |
| 104 | PIK3CA   | Phosphoinositide-3-kinase, catalytic, alpha polypeptide                                 |
| 105 | PLTP     | Phospholipid transfer protein                                                           |
| 106 | POLE2    | Polymerase (DNA directed), epsilon 2 (p59 subunit)                                      |
| 107 | POP4     | Processing of precursor 4, ribonuclease P/MRP subunit ( <i>S. cerevisiae</i> )          |
| 108 | PPP1CB   | Protein phosphatase 1, catalytic subunit, beta isozyme                                  |
| 109 | PRKCB1   | Protein kinase C, beta                                                                  |
| 110 | RAB3GAP2 | RAB3 GTPase activating protein subunit 2 (non-catalytic)                                |
| 111 | RABIF    | RAB interacting factor                                                                  |
| 112 | RAC1     | Ras-related C3 botulinum toxin substrate 1 (rho family, small GTP binding protein Rac1) |
| 113 | RAC3     | Ras-related C3 botulinum toxin substrate 3 (rho family, small GTP binding protein Rac3) |
| 114 | RACGAP1  | Rac GTPase activating protein 1                                                         |
| 115 | RCC1     | Regulator of chromosome condensation 1                                                  |
| 116 | RELA     | v-Rel reticuloendotheliosis viral oncogene homolog A (avian)                            |
| 117 | RHOA     | Ras homolog gene family, member A                                                       |
| 118 | RHOT1    | Ras homolog gene family, member T1                                                      |
| 119 | ROCK2    | Rho-associated, coiled-coil containing protein kinase 2                                 |
| 120 | RPL10A   | Ribosomal protein L10a                                                                  |
| 121 | RPL13    | Ribosomal protein L13                                                                   |
| 122 | RPL18    | Ribosomal protein L18                                                                   |
| 123 | RPL19    | Ribosomal protein L19                                                                   |
| 124 | RPL23A   | Ribosomal protein L23a                                                                  |
| 125 | RPL28    | Ribosomal protein L28                                                                   |
| 126 | RPL30    | Ribosomal protein L30                                                                   |
| 127 | RPL35    | Ribosomal protein L35                                                                   |
| 128 | RPL4     | Ribosomal protein L4                                                                    |
| 129 | RPL5     | Ribosomal protein L5                                                                    |
| 130 | RPL7     | Ribosomal protein L7                                                                    |

|     |         |                                                                                          |
|-----|---------|------------------------------------------------------------------------------------------|
| 131 | RPL7A   | Ribosomal protein L7a                                                                    |
| 132 | RPL8    | Ribosomal protein L8                                                                     |
| 133 | RPL9    | Ribosomal protein L9                                                                     |
| 134 | RPS10   | Ribosomal protein S10                                                                    |
| 135 | RPS18   | Ribosomal protein S18                                                                    |
| 136 | RPS2    | Ribosomal protein S2                                                                     |
| 137 | RPS21   | Ribosomal protein S21                                                                    |
| 138 | RPS3    | Ribosomal protein S3                                                                     |
| 139 | RPS5    | Ribosomal protein S5                                                                     |
| 140 | RPS7    | Ribosomal protein S7                                                                     |
| 141 | RPS8    | Ribosomal protein S8                                                                     |
| 142 | RRM1    | Ribonucleotide reductase M1                                                              |
| 143 | RRM2    | Ribonucleotide reductase M2                                                              |
| 144 | RUNX1   | Runt-related transcription factor 1                                                      |
| 145 | RUVBL2  | RuvB-like 2 (E. coli)                                                                    |
| 146 | S100A4  | S100 calcium binding protein A4                                                          |
| 147 | SCIN    | Scinderin                                                                                |
| 148 | SLC25A3 | Solute carrier family 25 (mitochondrial carrier; phosphate carrier), member 3            |
| 149 | SP1     | Sp1 transcription factor                                                                 |
| 150 | SRC     | v-Src sarcoma (Schmidt-Ruppin A-2) viral oncogene homolog (avian)                        |
| 151 | SSR2    | Signal sequence receptor, beta (translocon-associated protein beta)                      |
| 152 | STAT5B  | Signal transducer and activator of transcription 5B                                      |
| 153 | STMN1   | Stathmin 1                                                                               |
| 154 | TBX2    | T-box 2                                                                                  |
| 155 | TCF7    | Transcription factor 7 (T-cell specific, HMG-box)                                        |
| 156 | TGFB2   | Transforming growth factor, beta 2                                                       |
| 157 | THY1    | Thy-1 cell surface antigen                                                               |
| 158 | TIAL1   | TGFB1-induced anti-apoptotic factor 1                                                    |
| 159 | TK1     | Thymidine kinase 1, soluble                                                              |
| 160 | TLN1    | Talin 1                                                                                  |
| 161 | TOM1    | Target of myb1 (chicken)                                                                 |
| 162 | TPR     | Translocated promoter region (to activated MET oncogene)                                 |
| 163 | TRAM1   | Translocation associated membrane protein 1                                              |
| 164 | TRPA1   | Transient receptor potential cation channel, subfamily A, member 1                       |
| 165 | TTN     | Titin                                                                                    |
| 166 | TXNDC5  | Thioredoxin domain containing 5 (endoplasmic reticulum)                                  |
| 167 | UBE2D2  | Ubiquitin-conjugating enzyme E2D 2 (UBC4/5 homolog, yeast)                               |
| 168 | UBE2H   | Ubiquitin-conjugating enzyme E2H (UBC8 homolog, yeast)                                   |
| 169 | VANGL1  | Vang-like 1 (van gogh, Drosophila)                                                       |
| 170 | VAPA    | VAMP (vesicle-associated membrane protein)-associated protein A, 33kDa                   |
| 171 | VAV3    | Vav 3 guanine nucleotide exchange factor                                                 |
| 172 | VEGFC   | Vascular endothelial growth factor C                                                     |
| 173 | WNT4    | Wingless-type MMTV integration site family, member 4                                     |
| 174 | YWHAB   | Tyrosine 3-monooxygenase/tryptophan 5-monooxygenase activation protein, beta polypeptide |
