# Supplementary material for: A high level of liver-specific expression of oncogenic KrasV12 drives robust liver tumorigenesis in transgenic zebrafish
Source: PubMed Central journal article supplement — Dis Model Mech. 2011 Jul 4;4(6):801–13. doi: 10.1242/dmm.007831 (PMC3209649; doi:10.1242/dmm.007831), 2011-07-04
Supplement: supp_007831_DMM007831TableS8.pdf [file supp_007831_DMM007831TableS8.pdf]

**Table S8. Liver cancer progression-associated gene signature.** Identification of 20 genes from the zebrafish up-regulated enriched genes in both hyperplasia and carcinoma stages which remained up-regulated throughout human HCC progression from dysplasia (supplementary material Table S6) to carcinoma (supplementary material Table S7). These genes represent potential biological markers associated with liver cancer progression.

| No. | Gene Symbol | Gene Name                                                                                |
|-----|-------------|------------------------------------------------------------------------------------------|
| 1   | APOE        | Apolipoprotein E                                                                         |
| 2   | CCNB1       | Cyclin B1                                                                                |
| 3   | CDC25A      | Cell division cycle 25 homolog A (S. pombe)                                              |
| 4   | DERL1       | Der1-like domain family, member 1                                                        |
| 5   | MAPK1       | Mitogen-activated protein kinase 1                                                       |
| 6   | MAPK3       | Mitogen-activated protein kinase 3                                                       |
| 7   | MAPKAPK2    | Mitogen-activated protein kinase-activated protein kinase 2                              |
| 8   | MCM5        | Minichromosome maintenance complex component 5                                           |
| 9   | MDM2        | Mdm2 p53 binding protein homolog (mouse)                                                 |
| 10  | MMP14       | Matrix metalloproteinase 14 (membrane-inserted)                                          |
| 11  | NBN         | Nibrin                                                                                   |
| 12  | NLK         | Nemo-like kinase                                                                         |
| 13  | PIK3CA      | Phosphoinositide-3-kinase, catalytic, alpha polypeptide                                  |
| 14  | PRKCB1      | Protein kinase C, beta                                                                   |
| 15  | RRM2        | Ribonucleotide reductase M2                                                              |
| 16  | RUVBL2      | RuvB-like 2 (E. coli)                                                                    |
| 17  | SRC         | v-Src sarcoma (Schmidt-Ruppin A-2) viral oncogene homolog (avian)                        |
| 18  | THY1        | Thy-1 cell surface antigen                                                               |
| 19  | TK1         | Thymidine kinase 1, soluble                                                              |
| 20  | YWHAB       | Tyrosine 3-monooxygenase/tryptophan 5-monooxygenase activation protein, beta polypeptide |
