# Supplementary material for: A high level of liver-specific expression of oncogenic KrasV12 drives robust liver tumorigenesis in transgenic zebrafish
Source: PubMed Central journal article supplement — Dis Model Mech. 2011 Jul 4;4(6):801–13. doi: 10.1242/dmm.007831 (PMC3209649; doi:10.1242/dmm.007831), 2011-07-04
Supplement: supp_007831_DMM007831TableS9.pdf [file supp_007831_DMM007831TableS9.pdf]

**Table S9: Validation of differential gene expression by quantitative real-time PCR.**

Individual lesions from each liver tumorigenesis stage (hyperplastic liver, HL; hepatocellular carcinoma, HCC) were examined for the expression level of the selected genes. The log<sub>2</sub> fold change obtained from microarray data and RT-PCR for the genes validated are as shown in the table.

| No. | Gene symbol       |               | Gene name                                             | Log <sub>2</sub> fold change |       |                            |       |       |       |       |       |
|-----|-------------------|---------------|-------------------------------------------------------|------------------------------|-------|----------------------------|-------|-------|-------|-------|-------|
|     | Zebrafish         | Human         |                                                       | Microarray                   |       | Quantitative real-time PCR |       |       |       |       |       |
|     |                   |               |                                                       | HL                           | HCC   | HL1                        | HL2   | HL3   | HCC1  | HCC2  | HCC3  |
| 1   | <i>akt2l</i>      | <i>AKT2</i>   | V-akt murine thymoma viral oncogene homolog 2, like   | 1.06                         | 2.91  | 3.54                       | 2.95  | 2.78  | 6.75  | 5.46  | 6.03  |
| 2   | <i>angpt1</i>     | <i>ANGPT1</i> | Angiopoietin 1                                        | 0.12                         | 2.54  | 0.26                       | 0.73  | 0.23  | 1.58  | 2.34  | 1.87  |
| 3   | <i>ccnb1</i>      | <i>CCNB1</i>  | Cyclin B1                                             | 5.48                         | 7.85  | 5.11                       | 4.12  | 4.09  | 9.67  | 9.46  | 8.23  |
| 4   | <i>mapk1</i>      | <i>MAPK1</i>  | Mitogen-activated protein kinase 1                    | 2.13                         | 2.18  | 3.28                       | 2.54  | 4.45  | 5.79  | 6.78  | 6.92  |
| 5   | <i>mapk3</i>      | <i>MAPK3</i>  | Mitogen-activated protein kinase 3                    | 2.31                         | 2.64  | 2.73                       | 1.12  | 3.67  | 3.92  | 4.65  | 3.75  |
| 6   | <i>mapk8</i>      | <i>MAPK8</i>  | Mitogen-activated protein kinase 8                    | 2.09                         | 3.91  | 2.58                       | 2.56  | 2.91  | 4.71  | 3.56  | 4.42  |
| 7   | <i>mdm2</i>       | <i>MDM2</i>   | Transformed 3T3 cell double minute 2 homolog          | 5.66                         | 3.07  | 2.91                       | 3.40  | 3.66  | 3.64  | 4.07  | 4.54  |
| 8   | <i>nfya</i>       | <i>NFYA</i>   | Nuclear transcription factor Y, alpha                 | 6.56                         | 1.74  | 4.83                       | 5.13  | 5.76  | 0.47  | 0.56  | 0.91  |
| 9   | <i>nlk1</i>       | <i>NLK</i>    | Nemo like kinase b                                    | 2.16                         | 2.35  | 1.02                       | 2.34  | 2.61  | 1.64  | 1.07  | 1.13  |
| 10  | <i>rpl19</i>      | <i>RPL19</i>  | Ribosomal protein 19                                  | 1.20                         | 2.81  | 2.98                       | 1.45  | 2.76  | 4.78  | 4.75  | 4.12  |
| 11  | <i>stat3</i>      | <i>STAT3</i>  | Signal transduction and activation of transcription 3 | -1.06                        | 2.53  | -0.67                      | -1.05 | 0.12  | 3.76  | 3.21  | 2.65  |
| 12  | <i>stmn1a</i>     | <i>STMN1</i>  | Stathmin 1a                                           | -1.30                        | 3.93  | -0.59                      | -0.33 | -0.67 | 4.76  | 4.12  | 5.23  |
| 13  | <i>tgfb1</i>      | <i>TGFB1</i>  | Transforming growth factor, beta 1                    | 0.41                         | 1.88  | 0.79                       | 0.04  | -0.32 | 3.40  | 2.11  | 2.18  |
| 14  | <i>tp53</i>       | <i>TP53</i>   | Tumor protein p53                                     | 2.47                         | -3.54 | 3.55                       | 2.76  | 4.29  | -0.18 | -1.12 | -1.56 |
| 15  | <i>zgc:194152</i> | <i>NBN</i>    | Nibrin                                                | 2.15                         | 2.05  | 1.54                       | 2.25  | 2.71  | 3.76  | 1.10  | 1.75  |
